# Supplementary material
Source: PubMed Central journal article supplement (PMC2998982)

# Chromatography of P10 Column

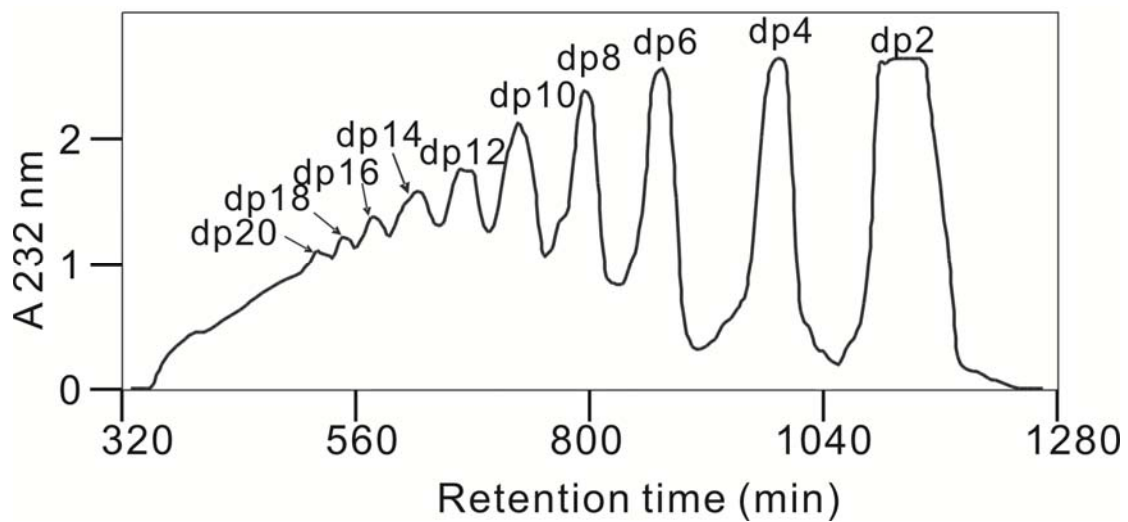

## Purification by Strong-ion-exchange HPLC Chromatography

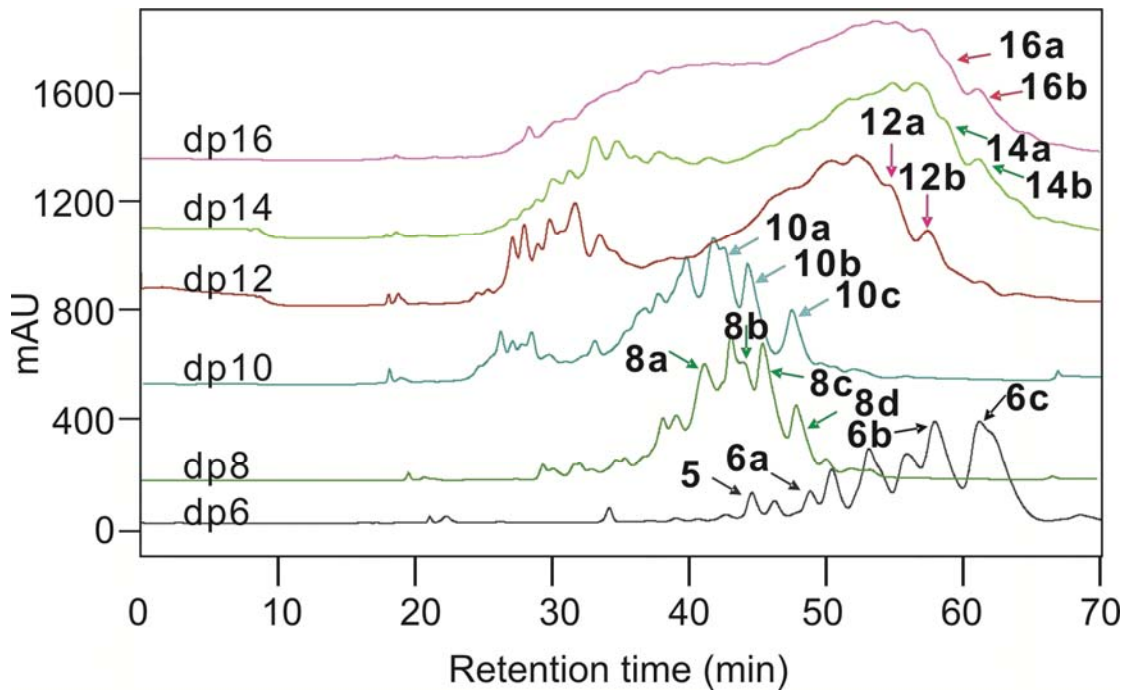

## Chemical Structures of Heparin-derived Oligosaccharides

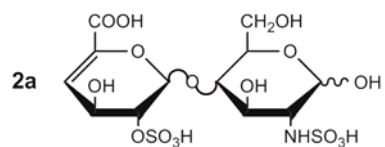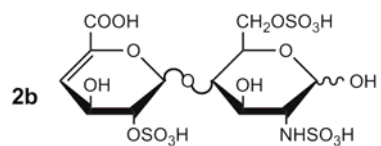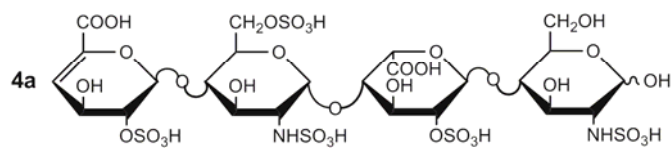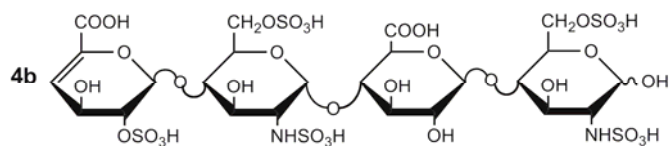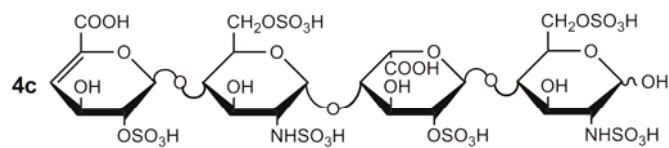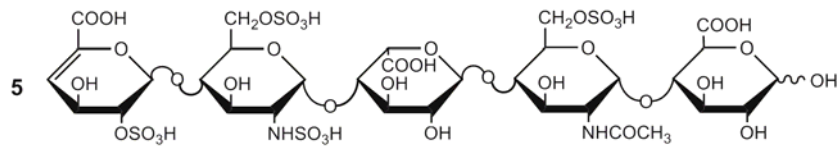

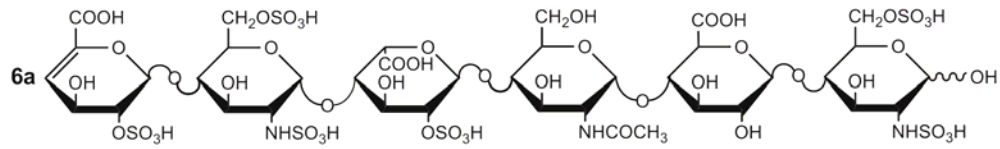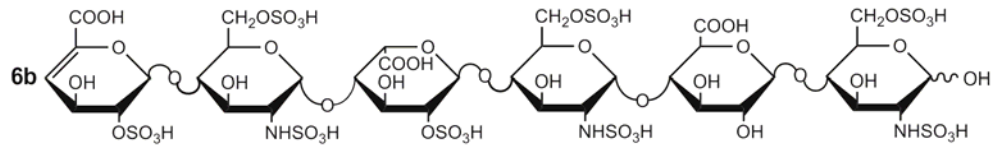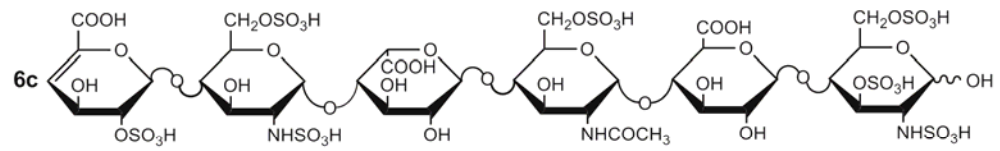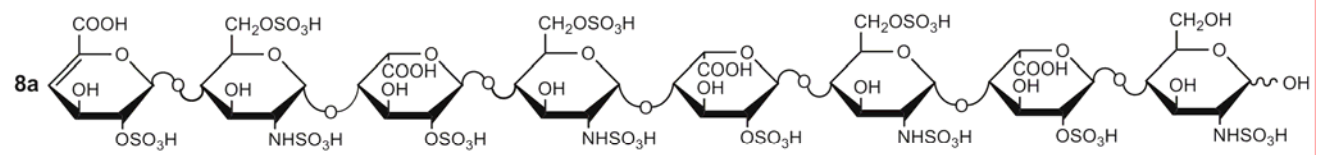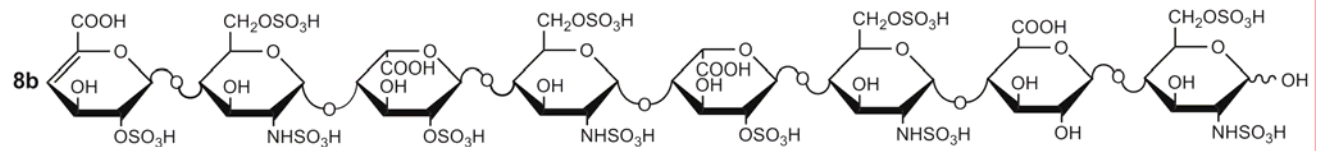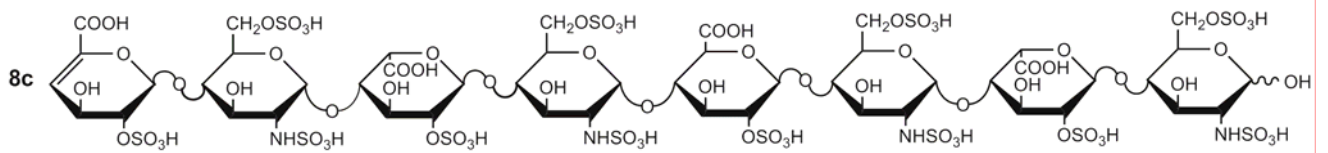

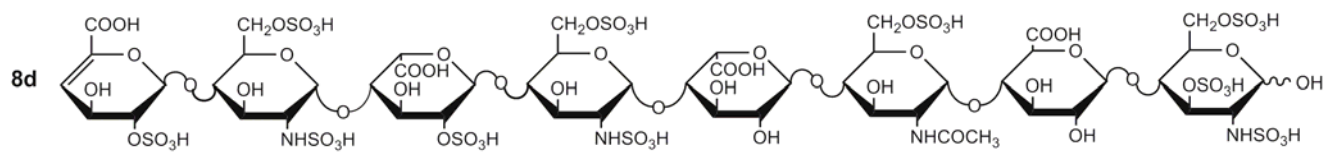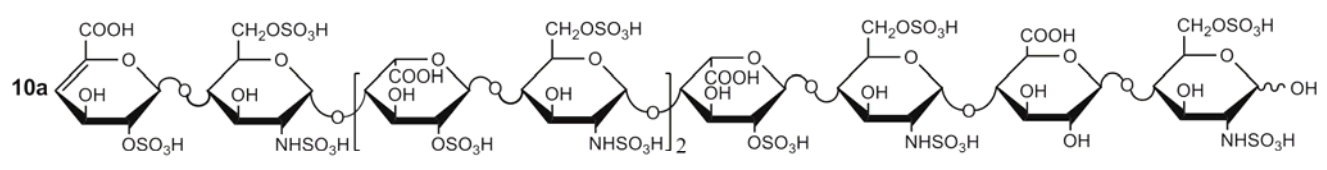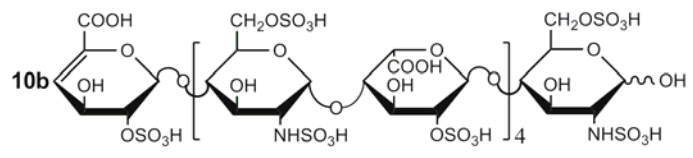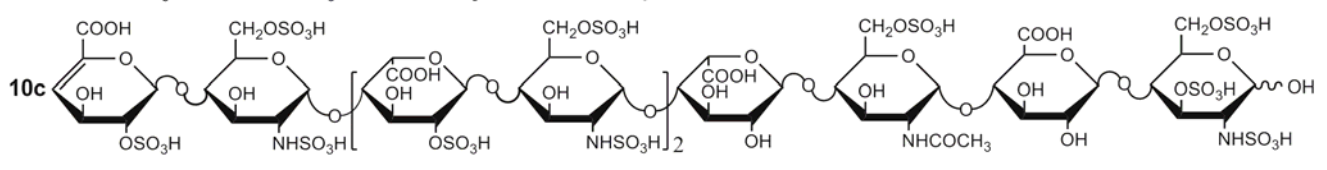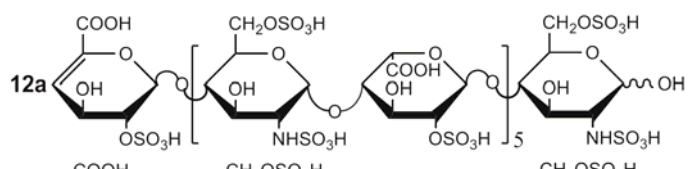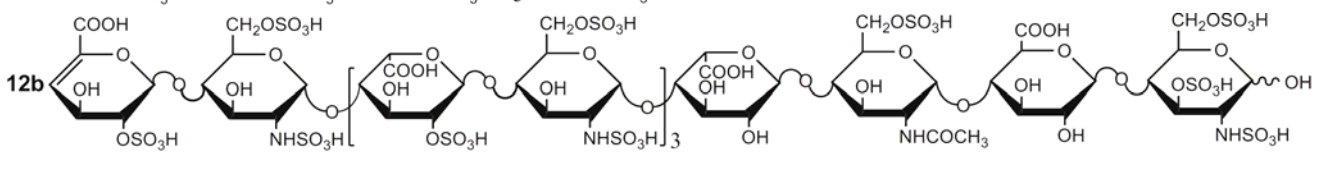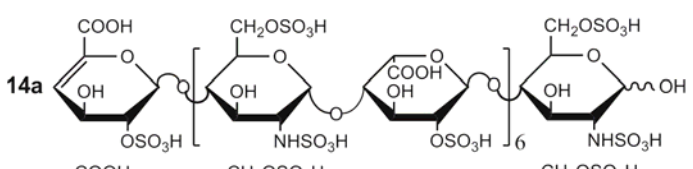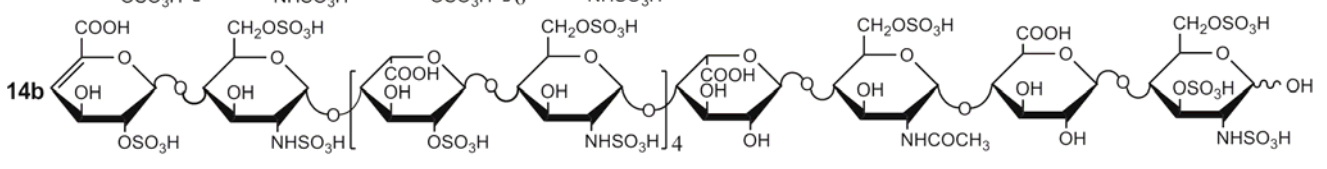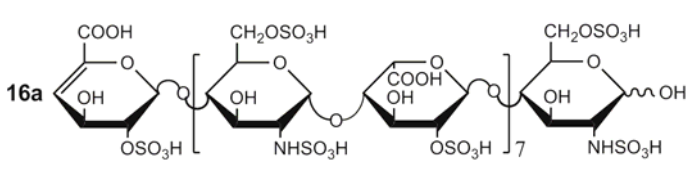

# Mass Spectra

2a

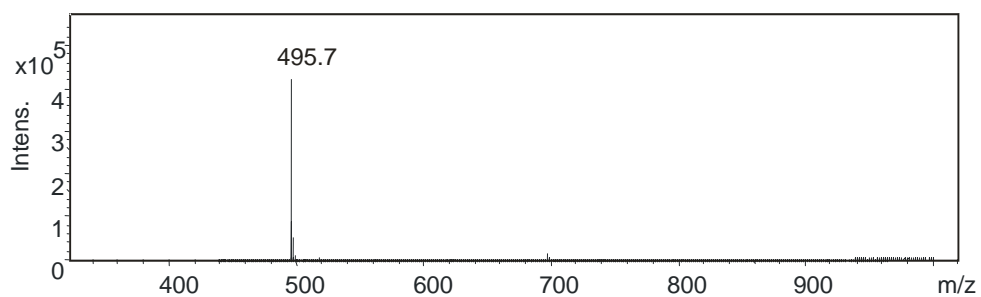

2b

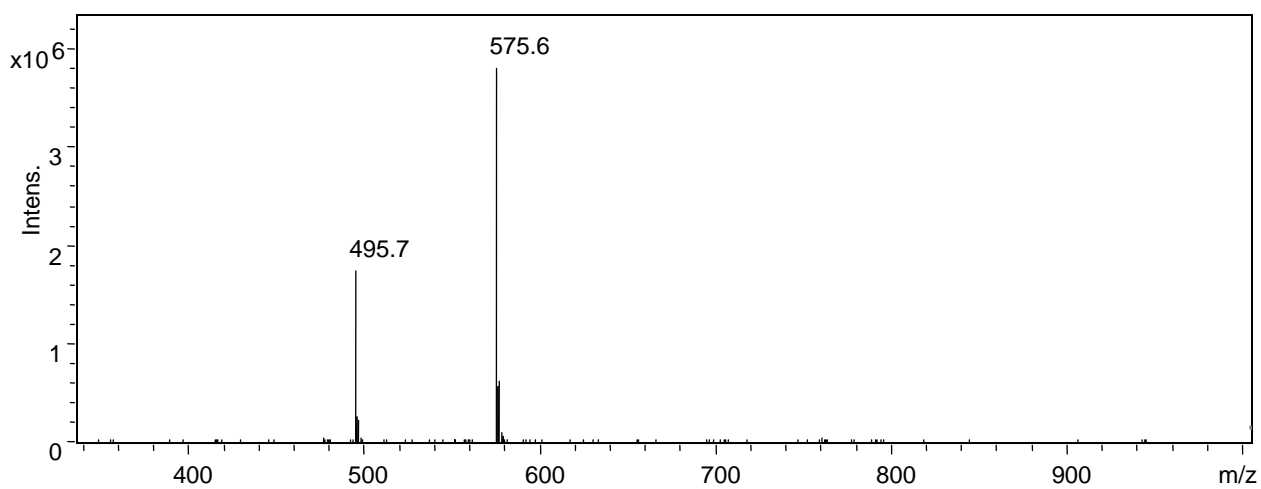

4a

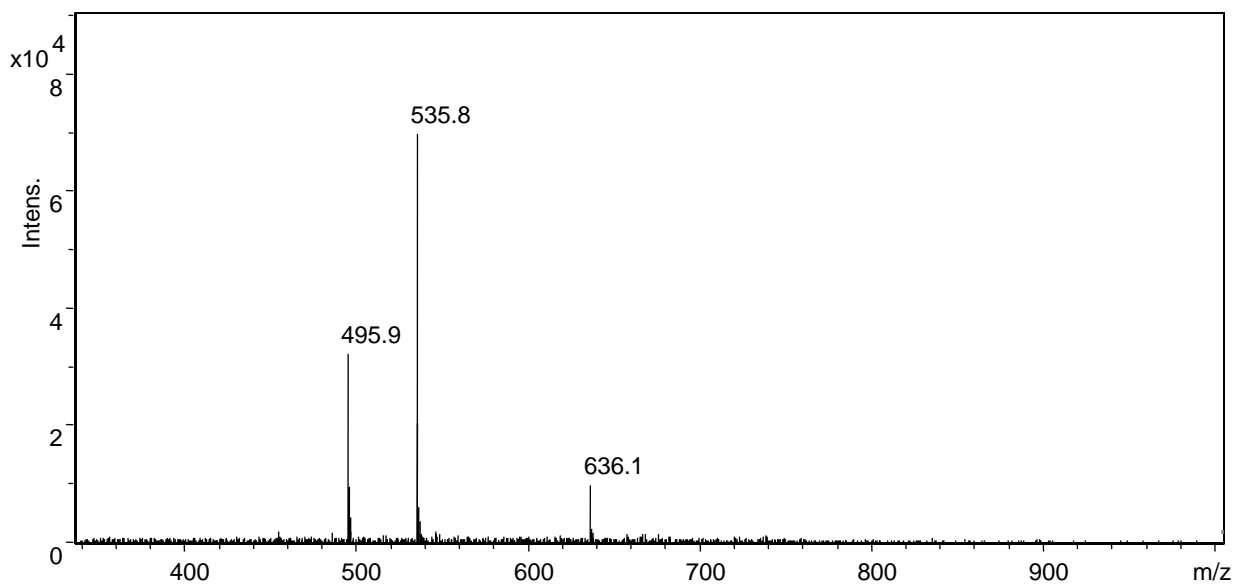

**4b**

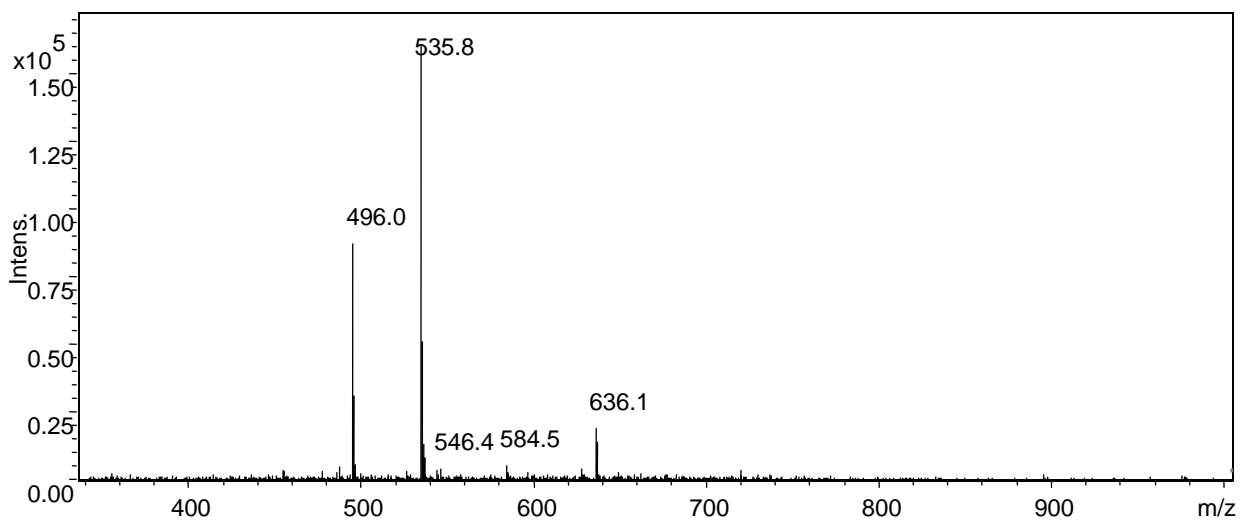

**4c**

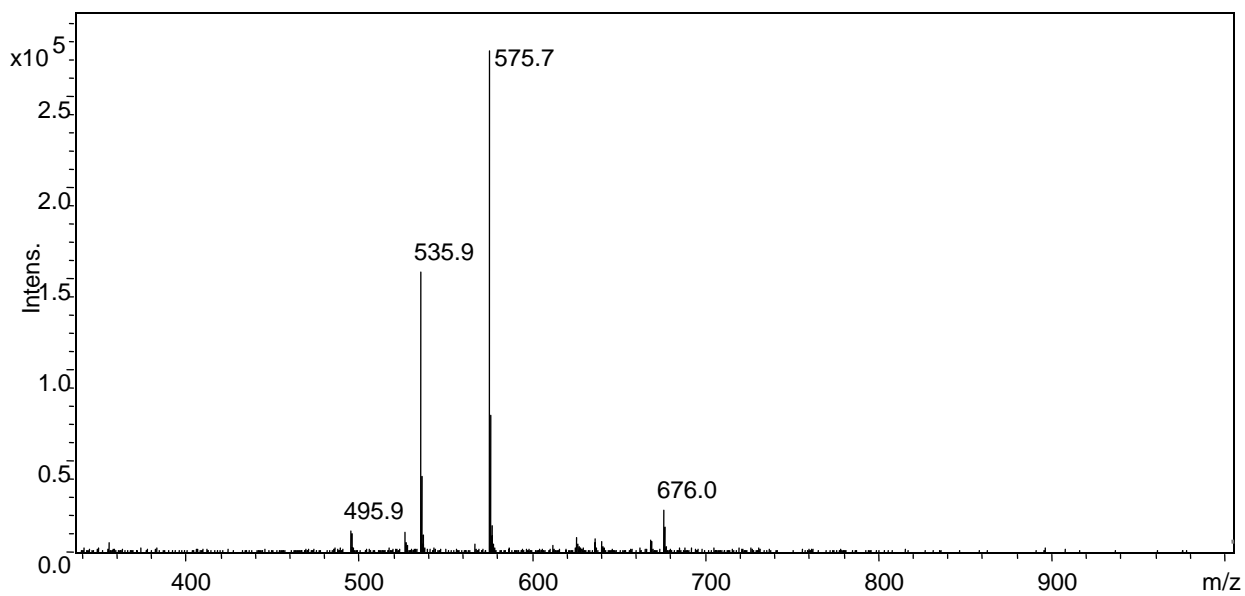

**5**

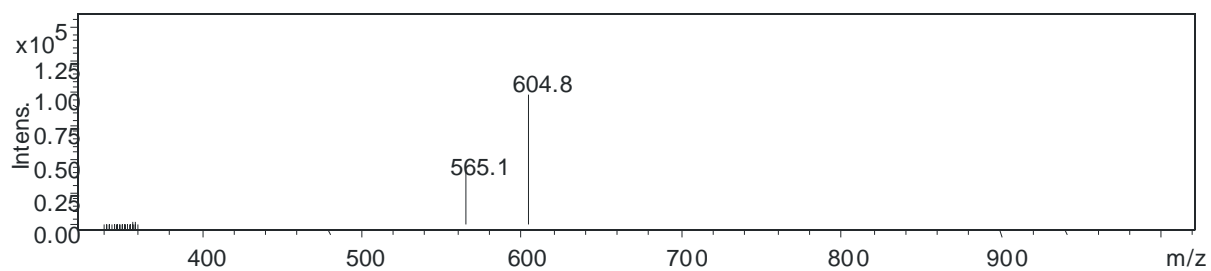

**6a**

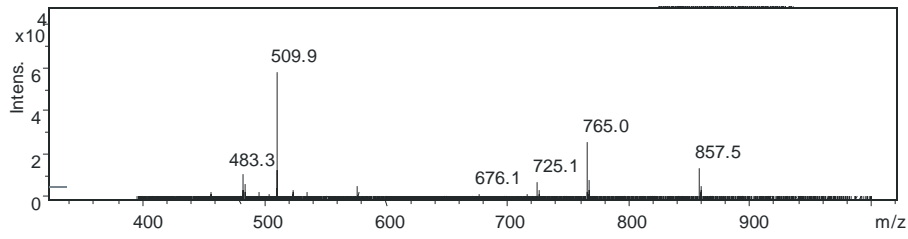

**6c**

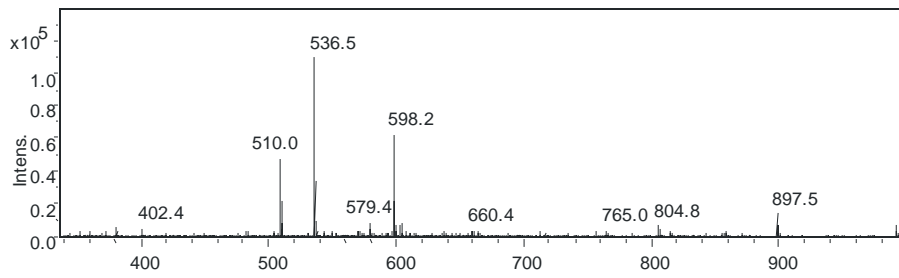

**8a**

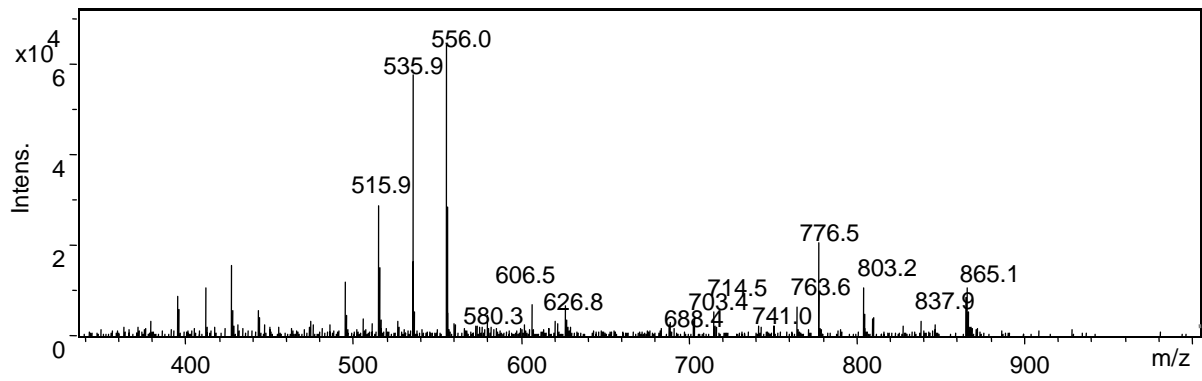

**8b**

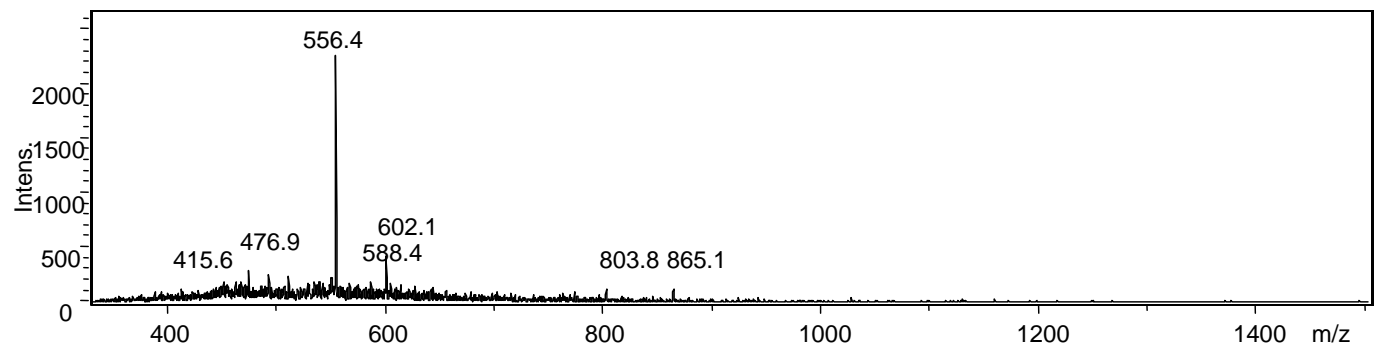



8c

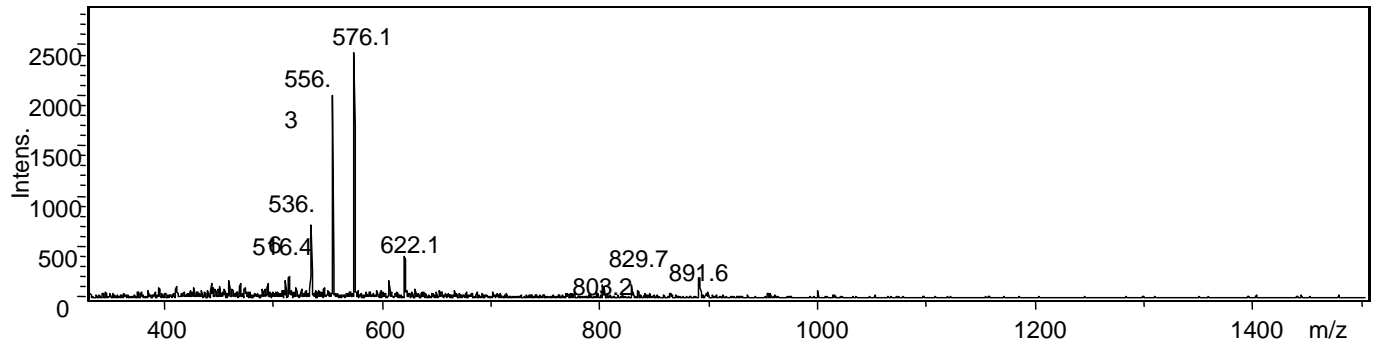

8d

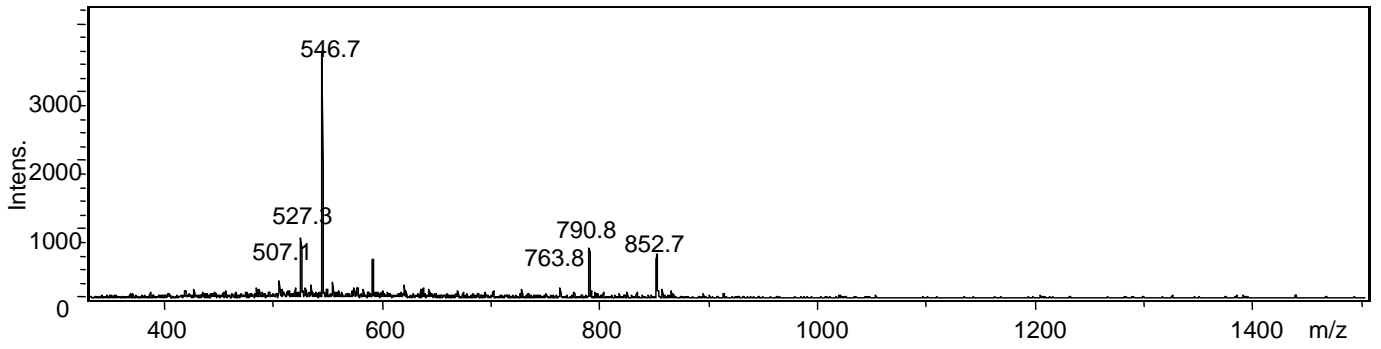

10a

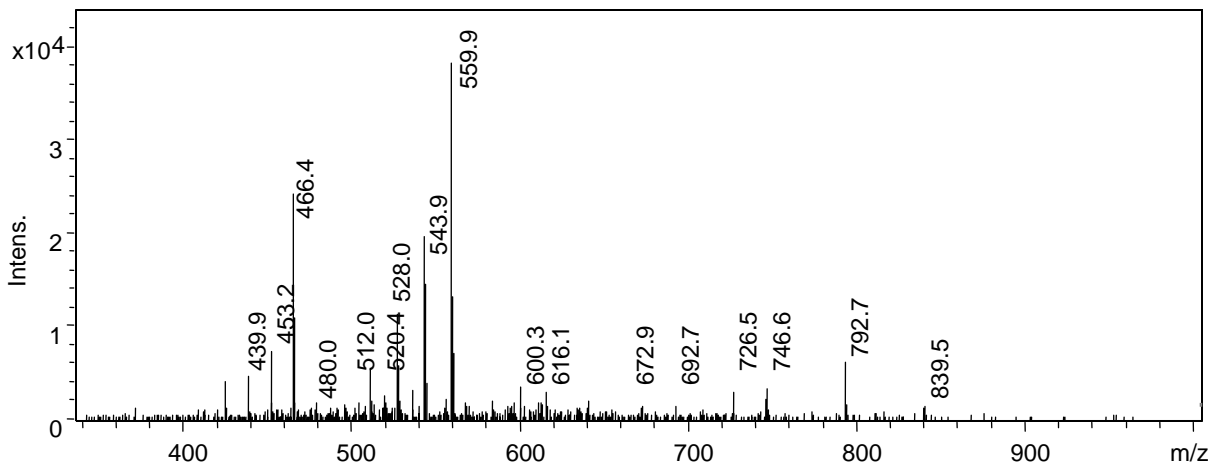

10b

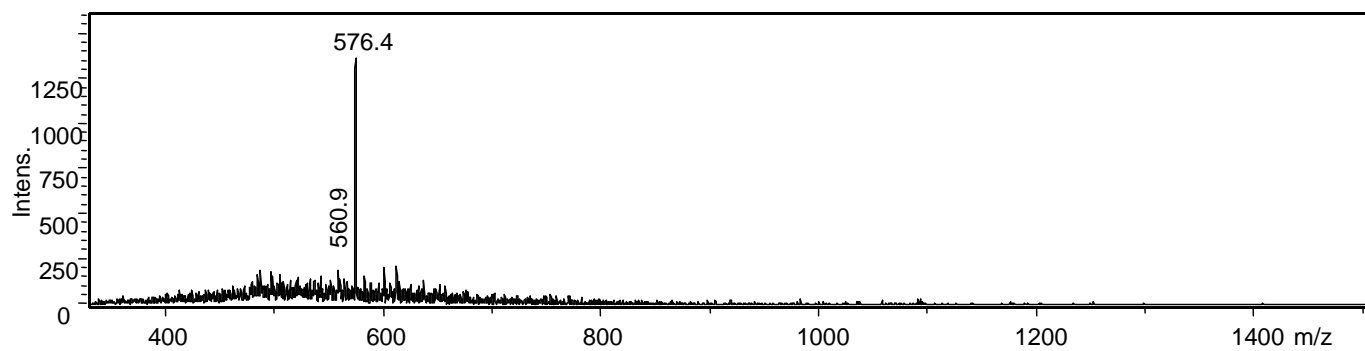

10c

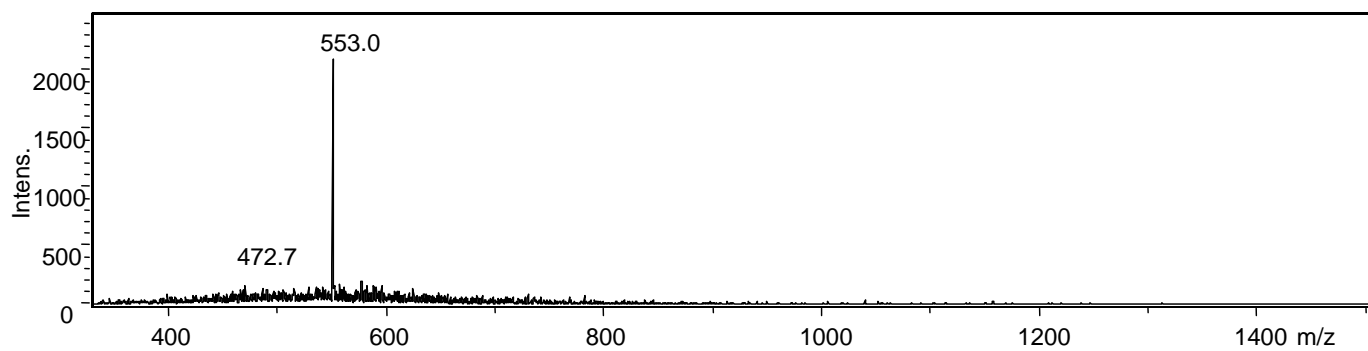

12a

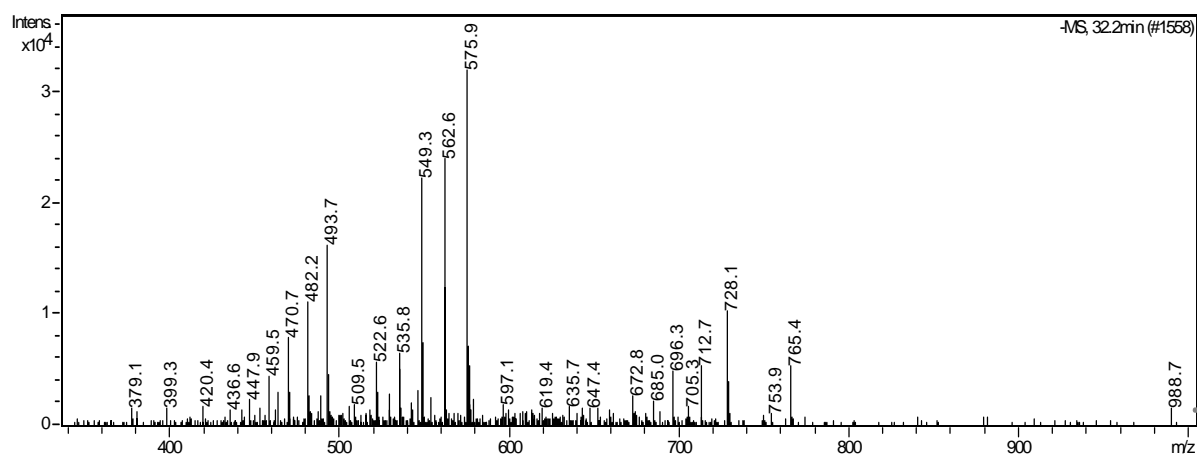

### 12b

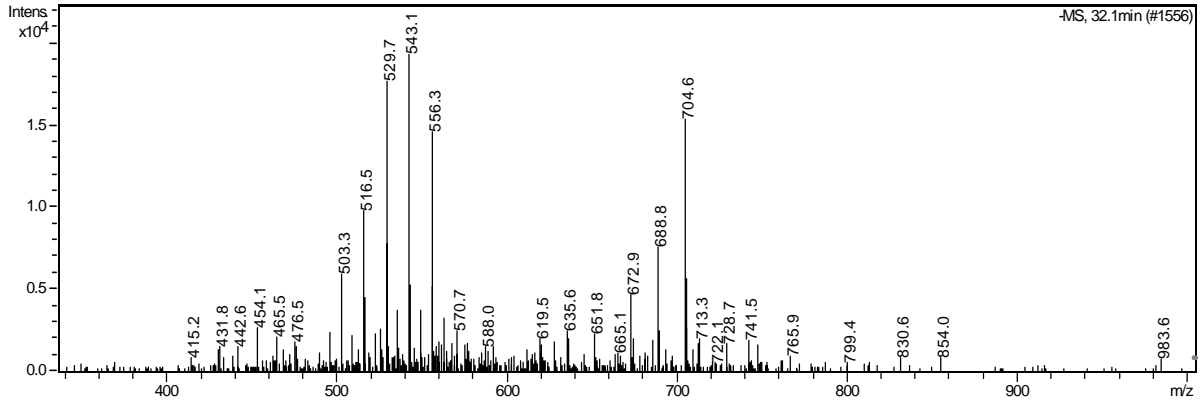

### 14a

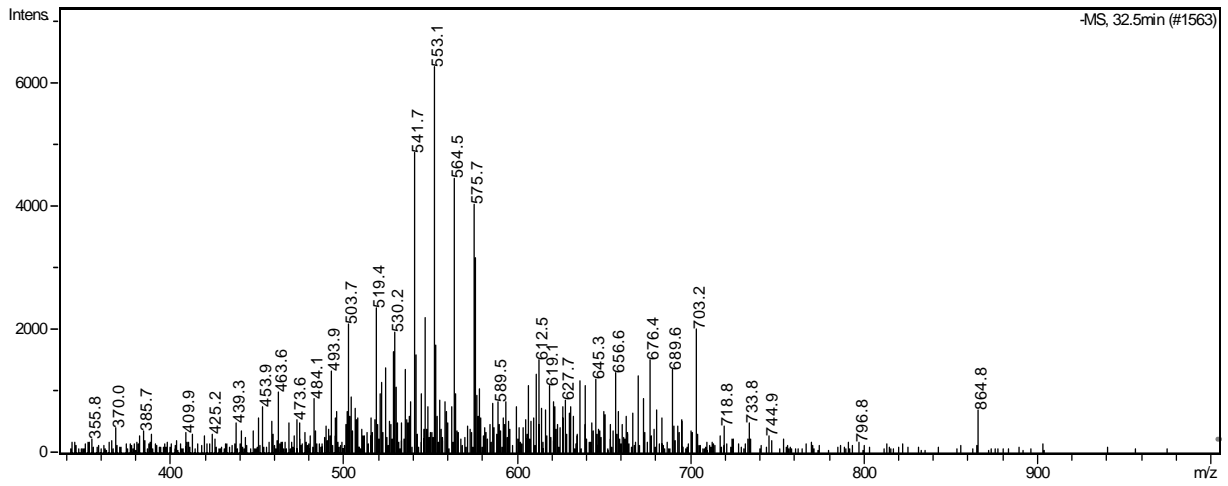

### 14b

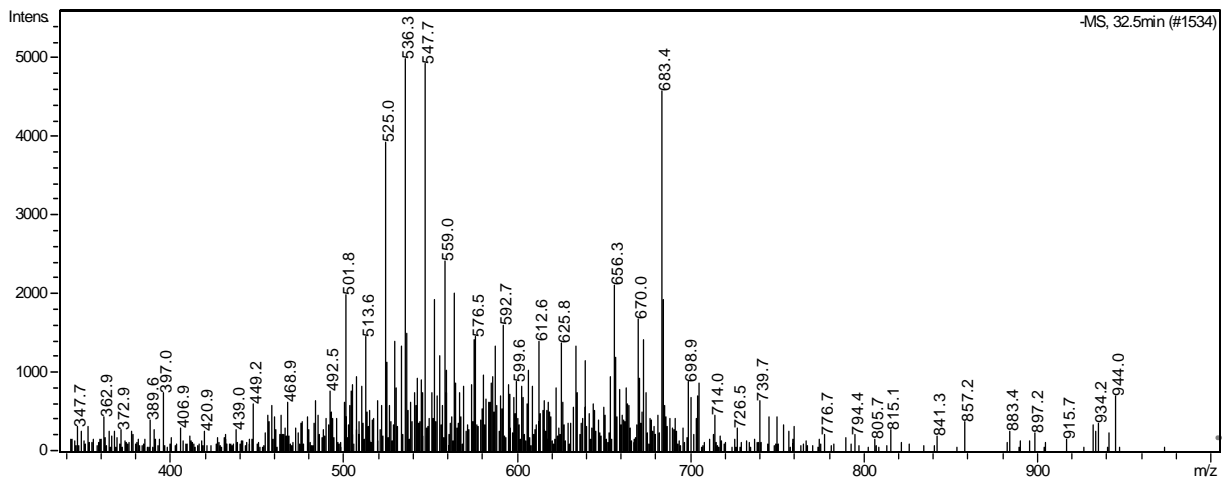

# 16a

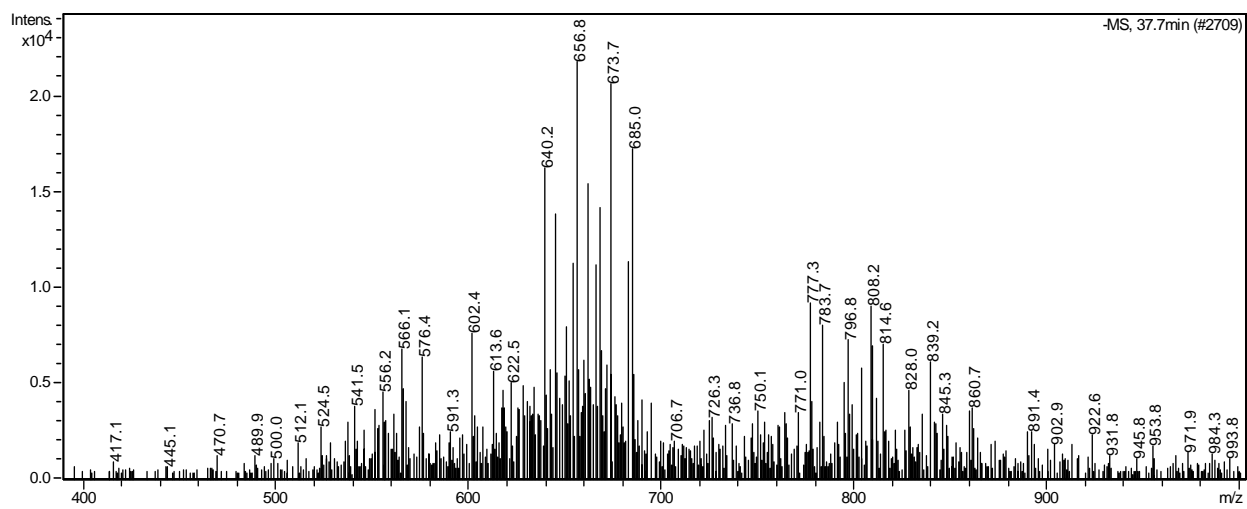

# 1D and 2D NMR Spectra

4a

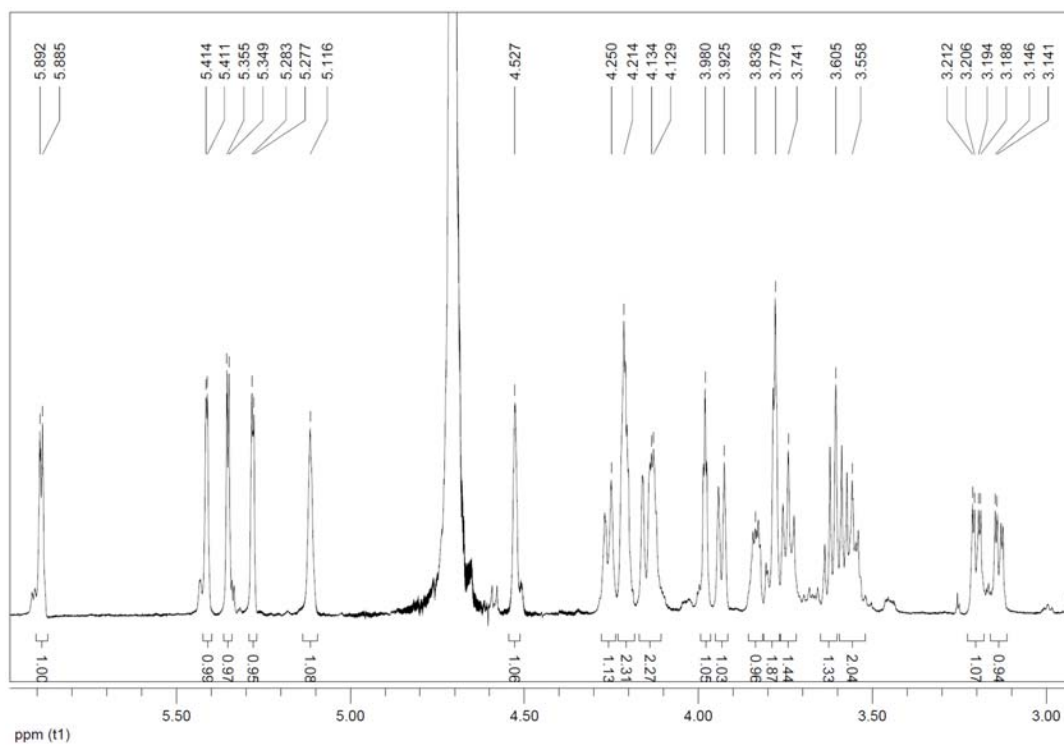

4a <sup>1</sup>H-NMR

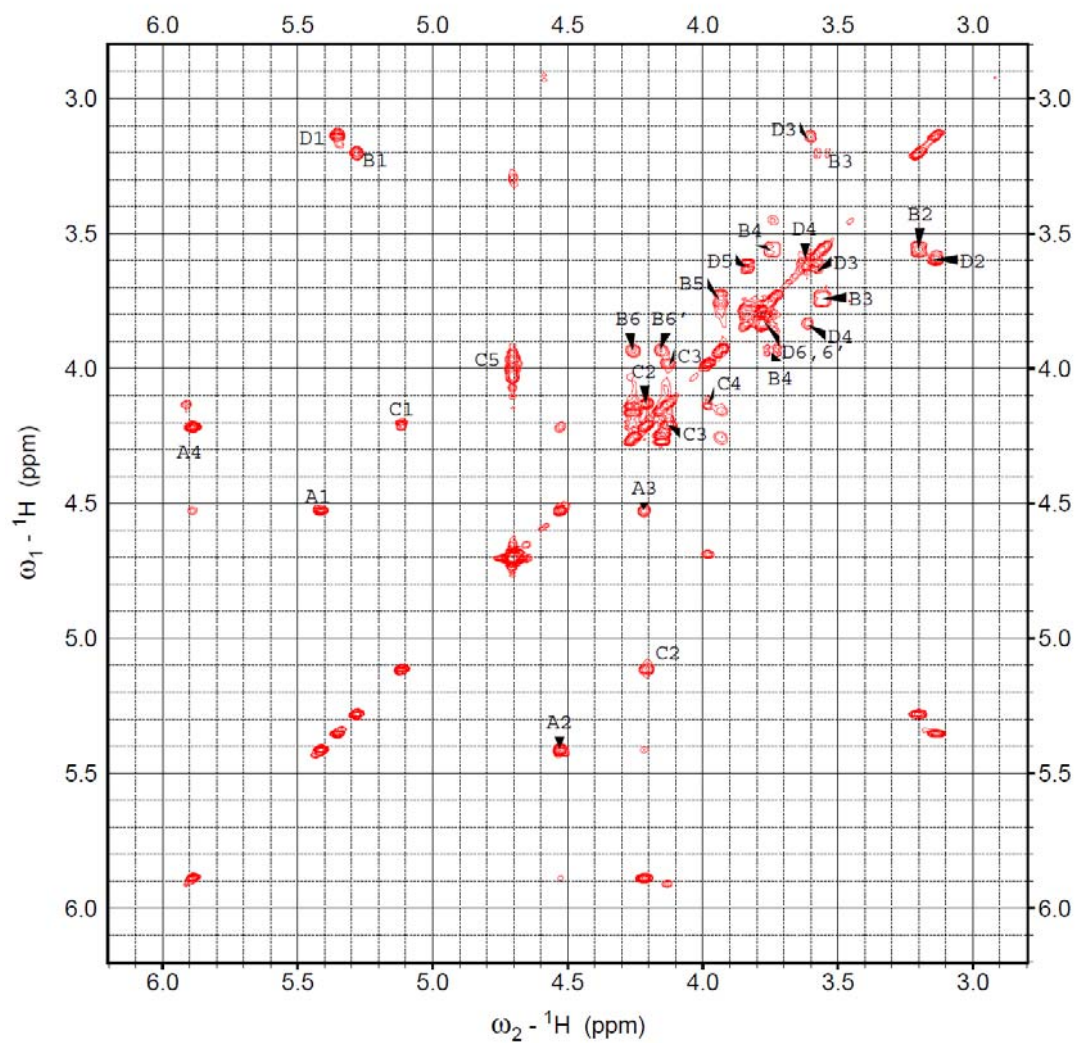

**4a**  ${}^1\text{H}$ - ${}^1\text{H}$  COSY

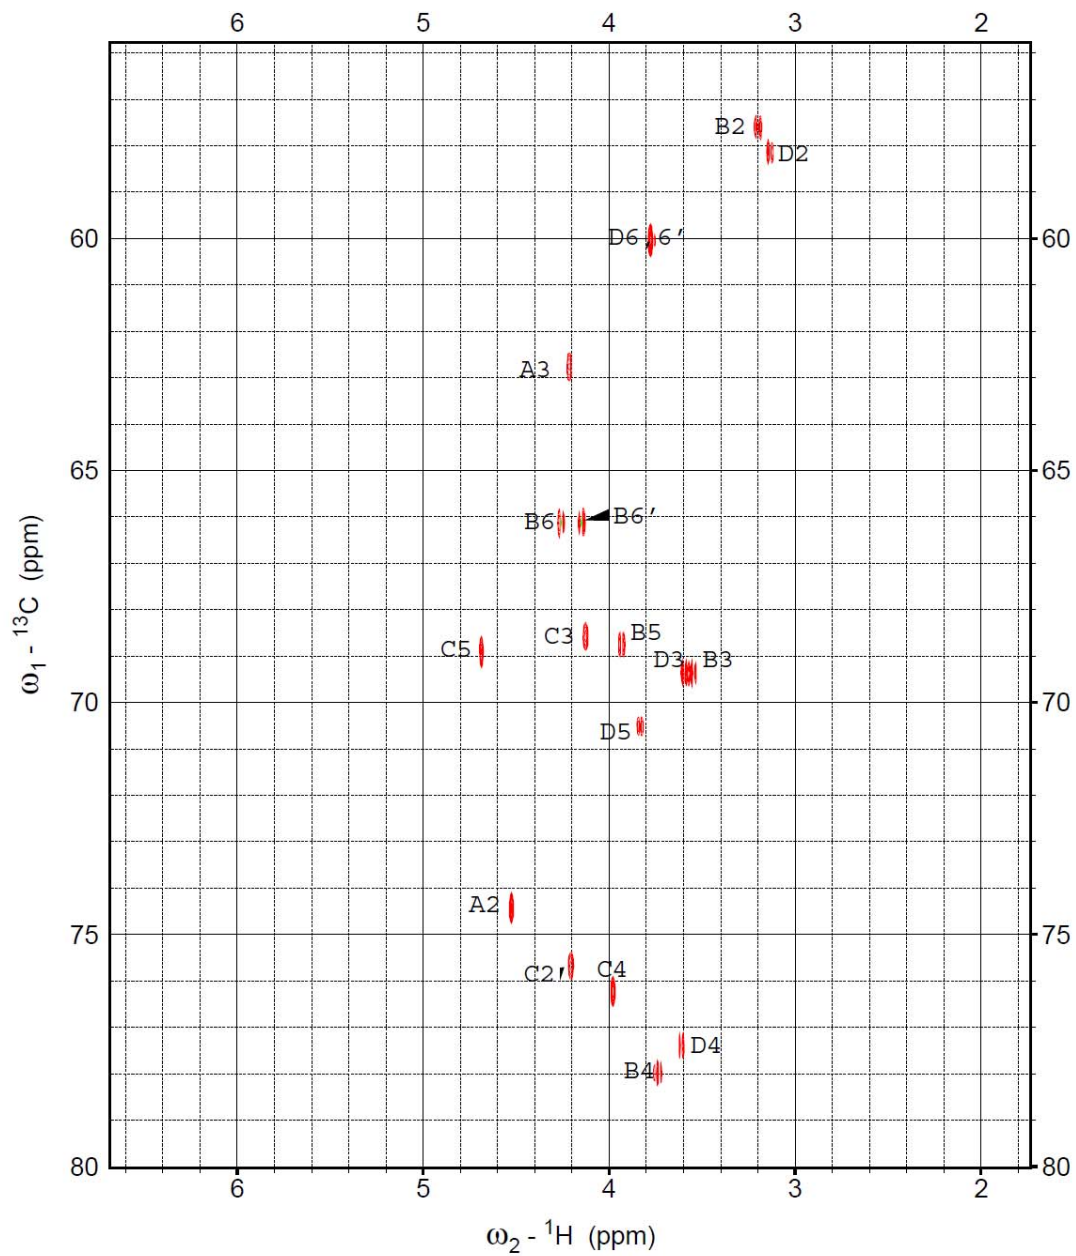

**4a HMQC**

4b

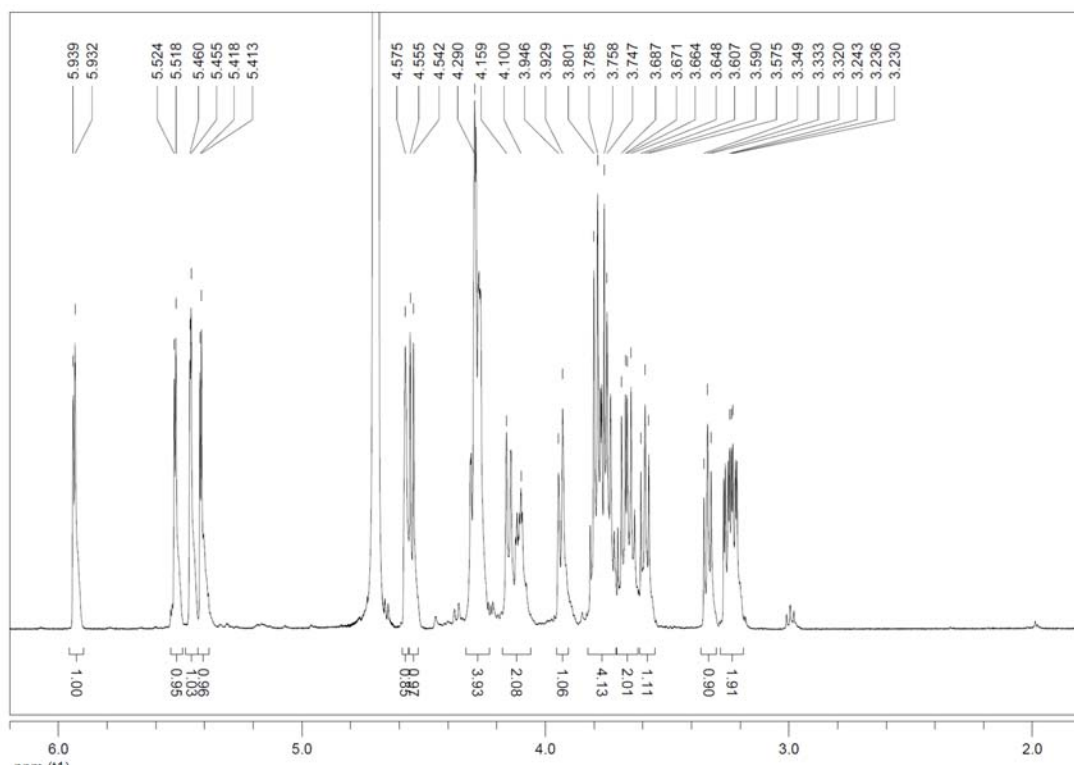

4b  $^1\text{H-NMR}$



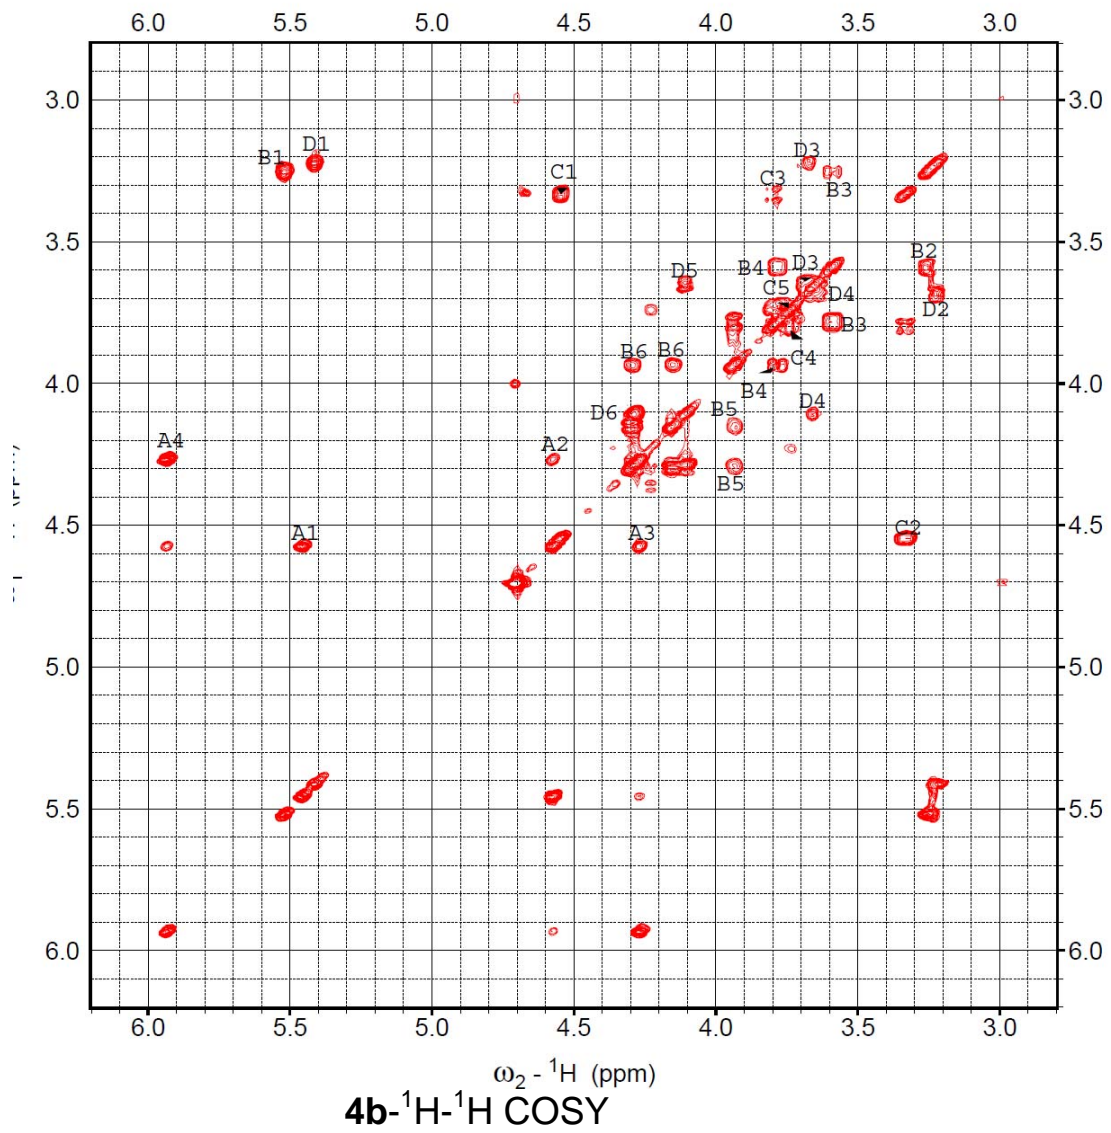

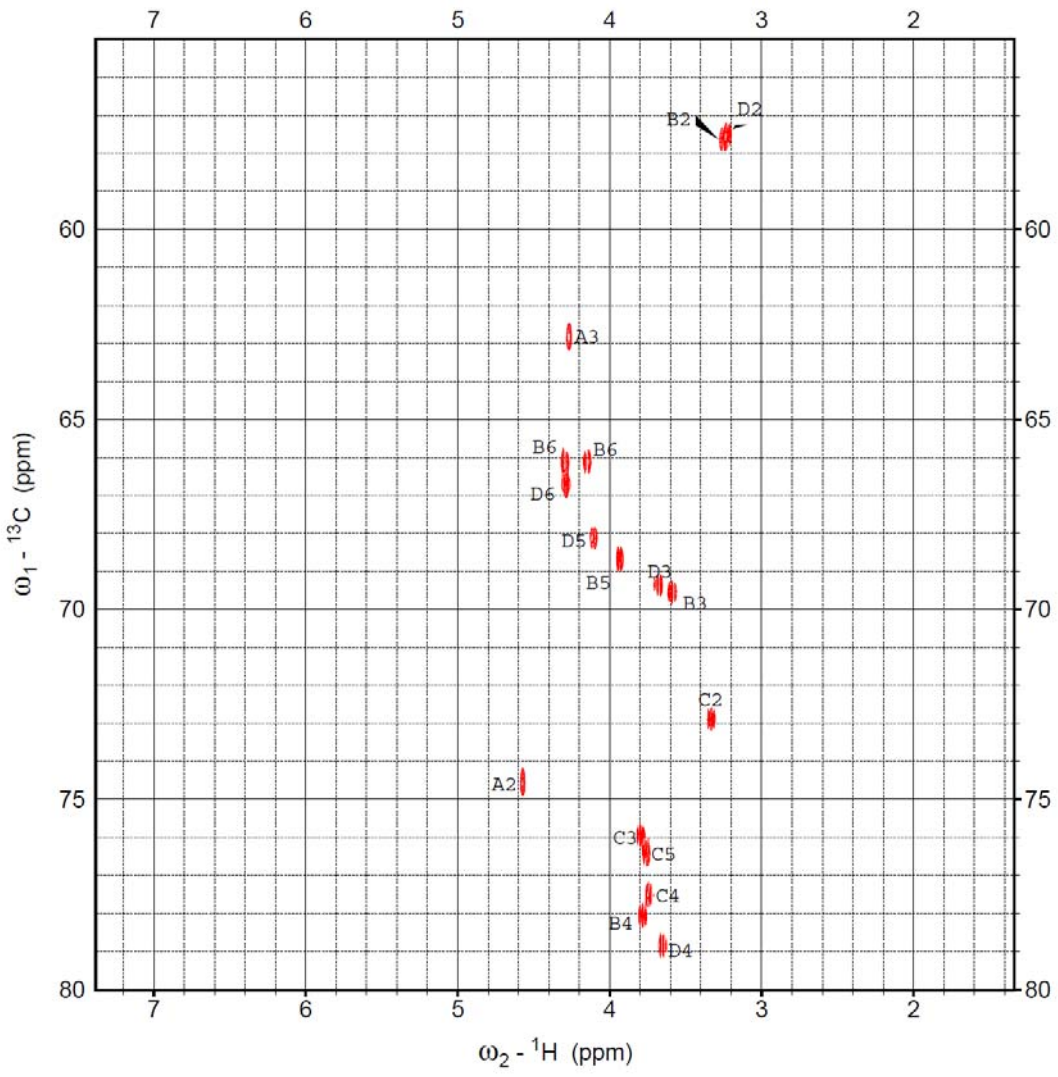

**4b** HMQC

4c

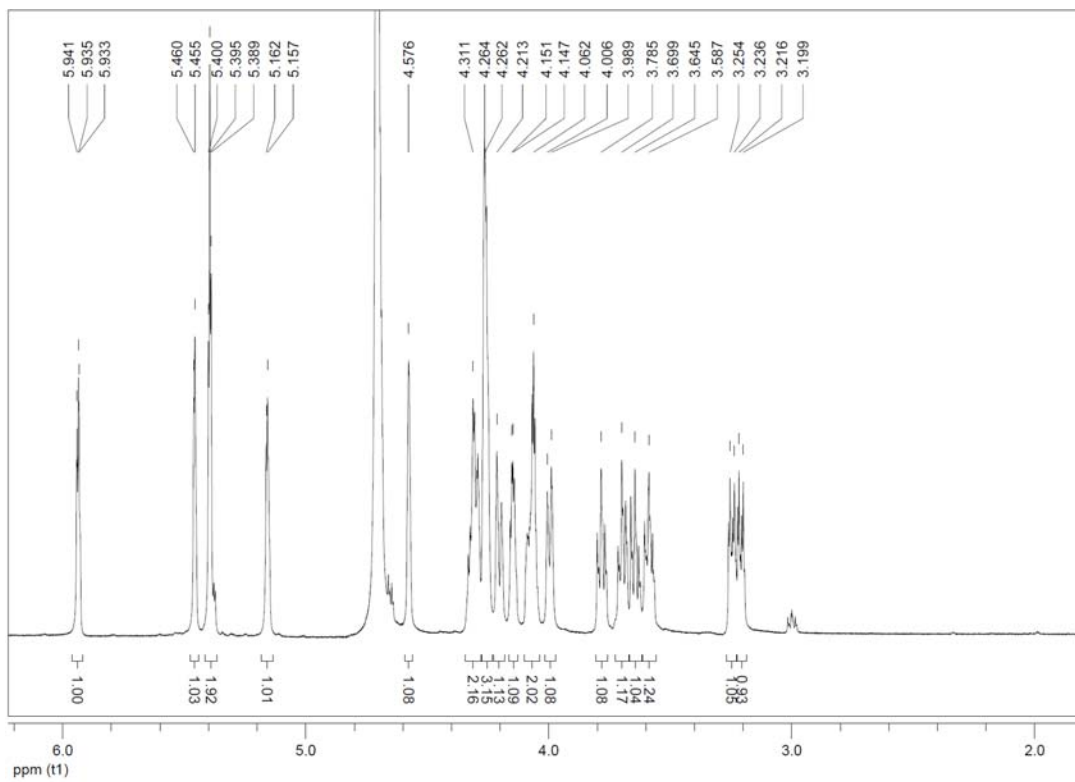

4c <sup>1</sup>H-NMR

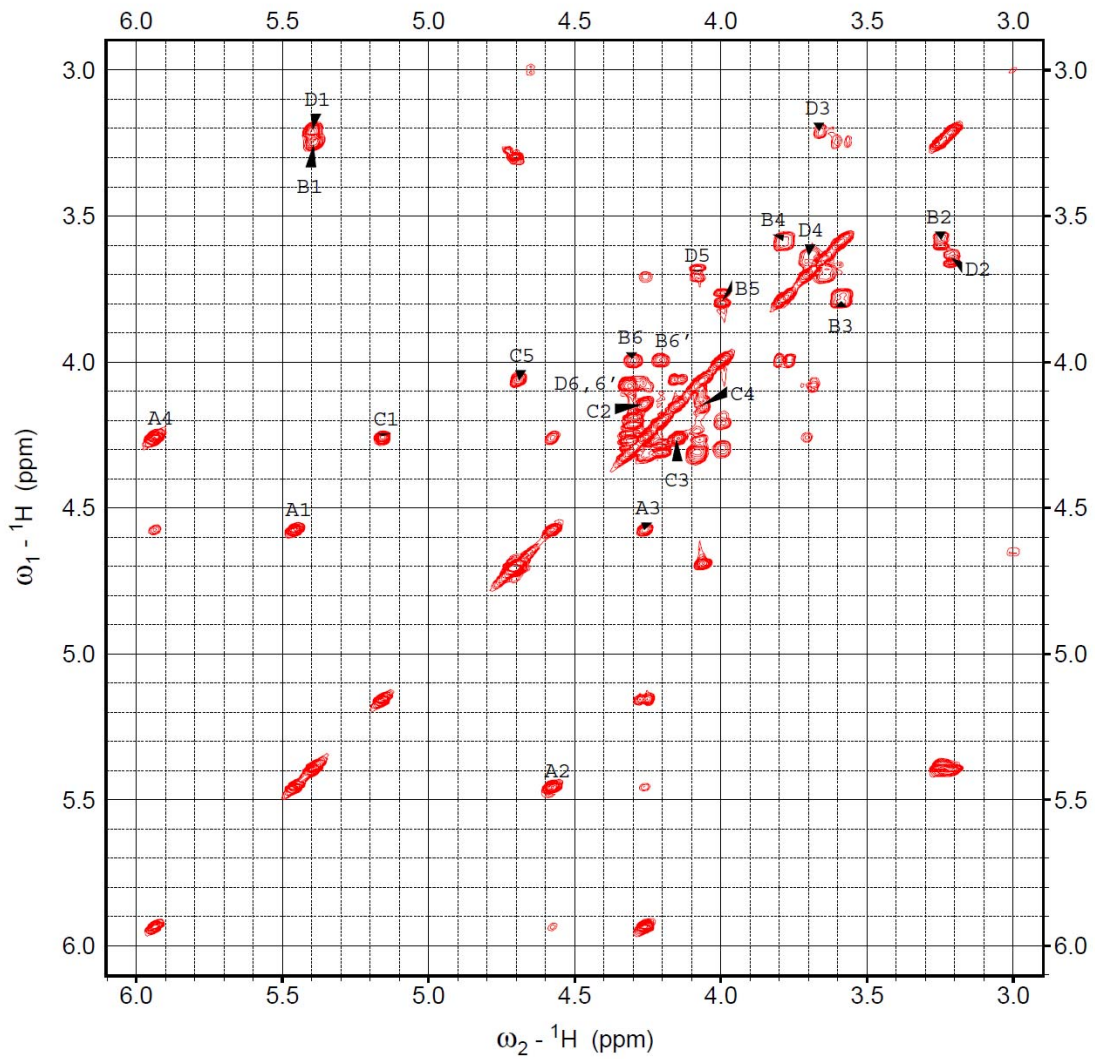

**4c-<sup>1</sup>H-<sup>1</sup>H COSY**

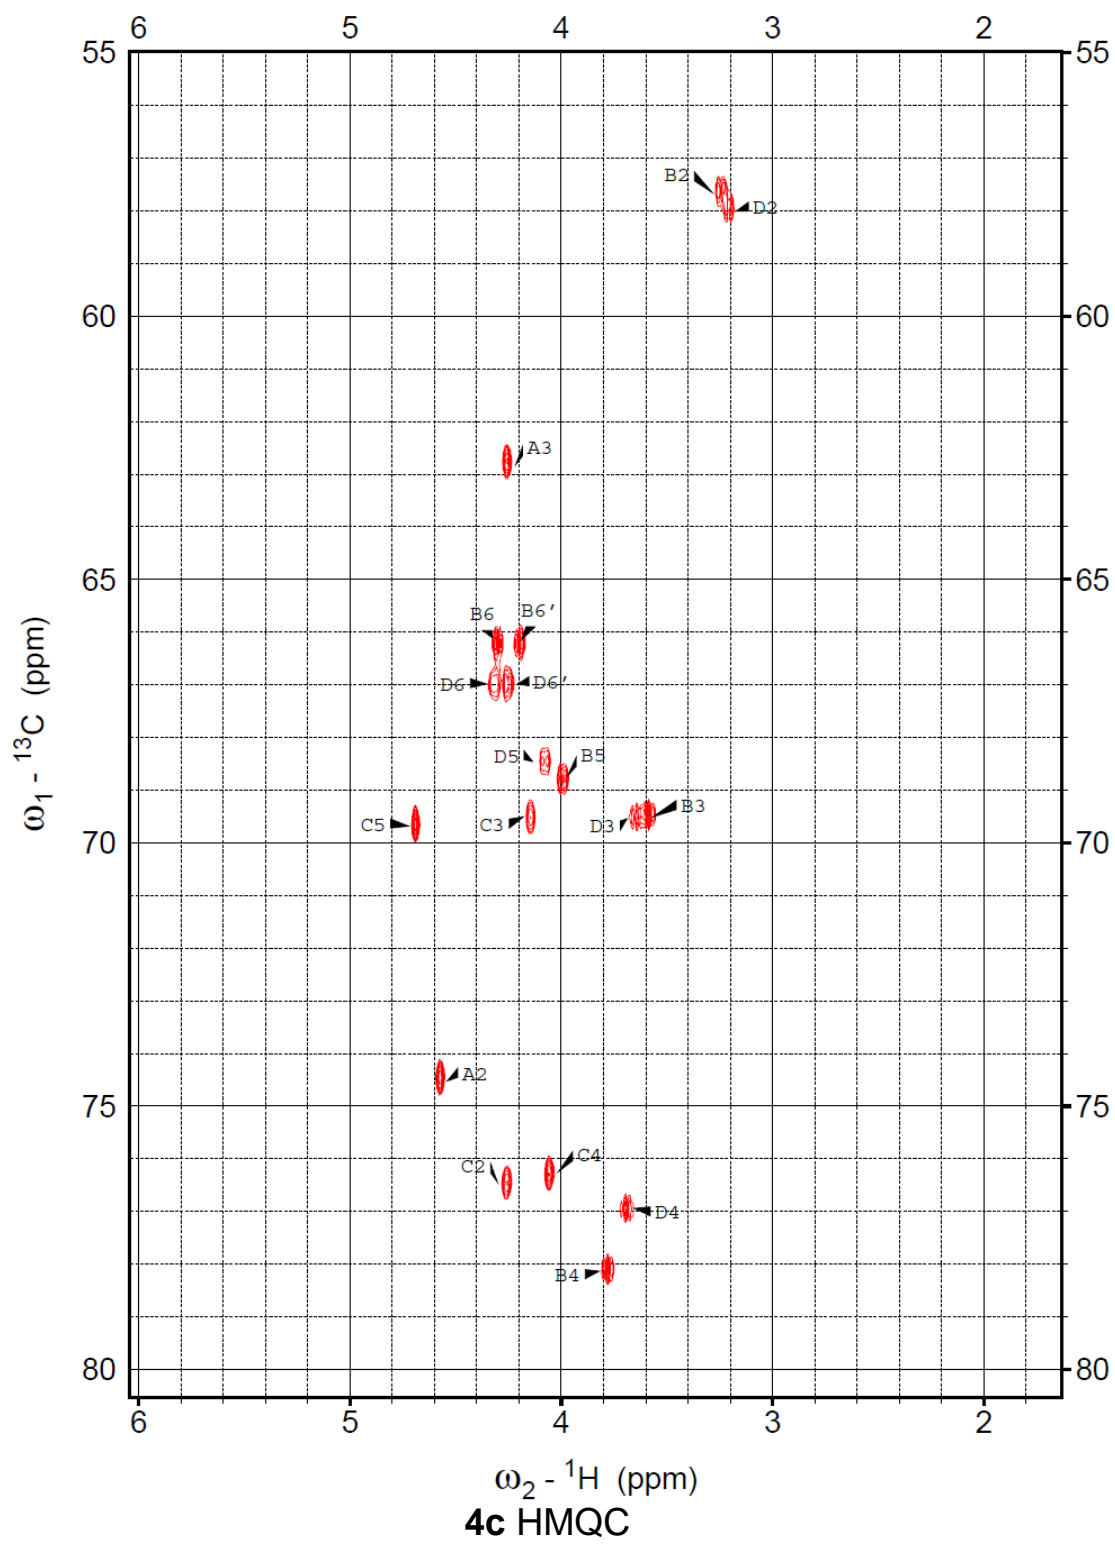

5

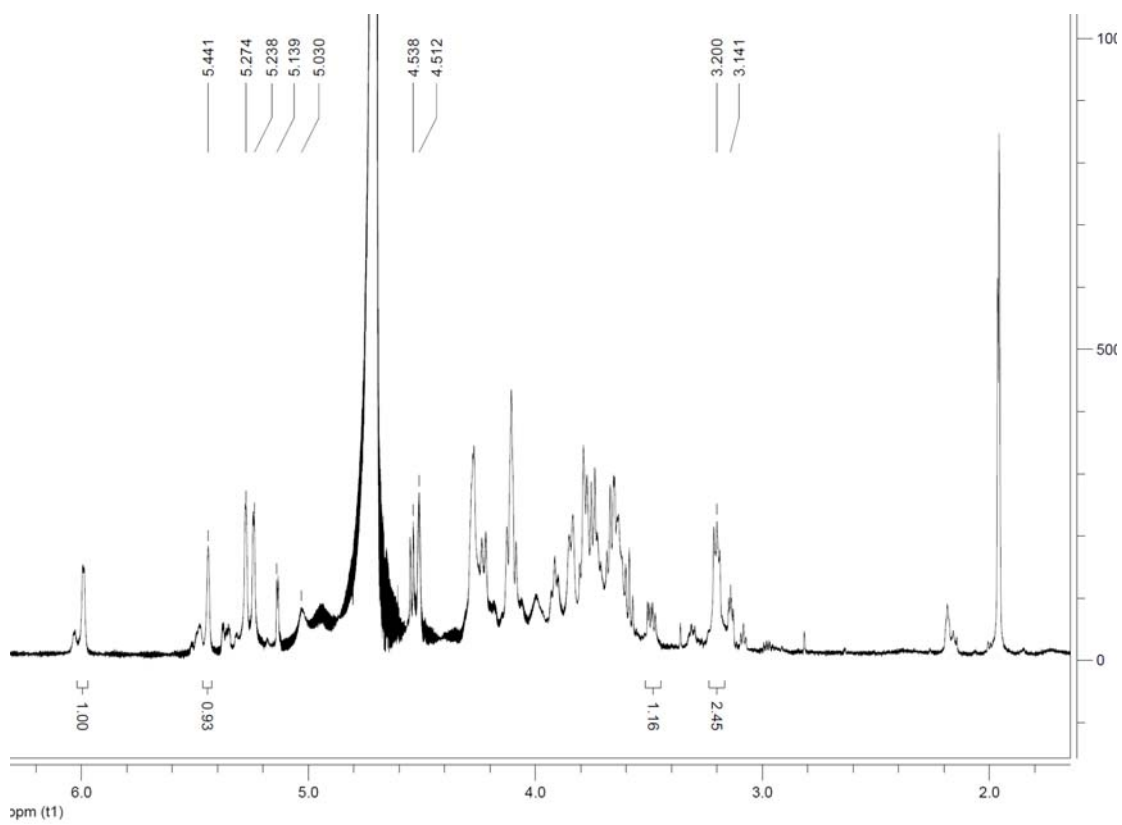

5 <sup>1</sup>H-NMR

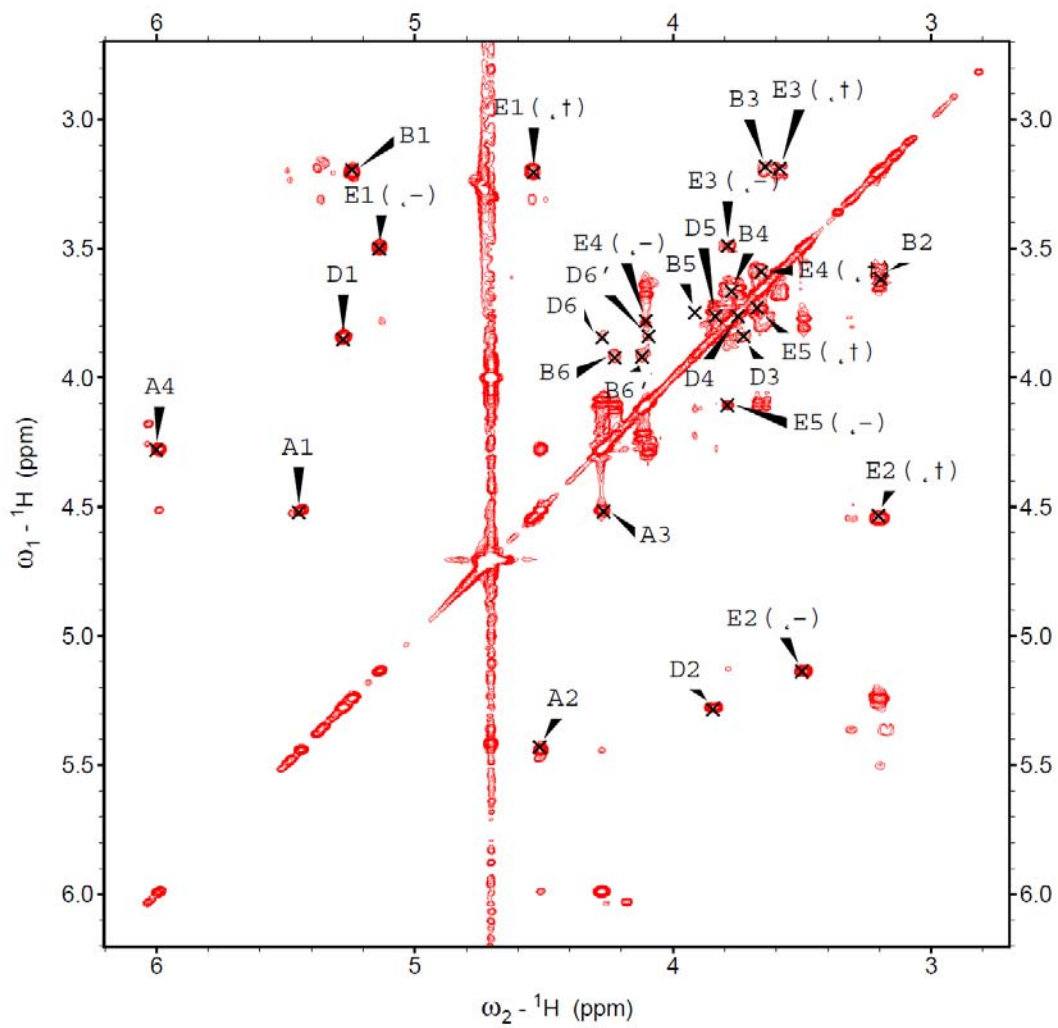

5 <sup>1</sup>H-<sup>1</sup>H COSY

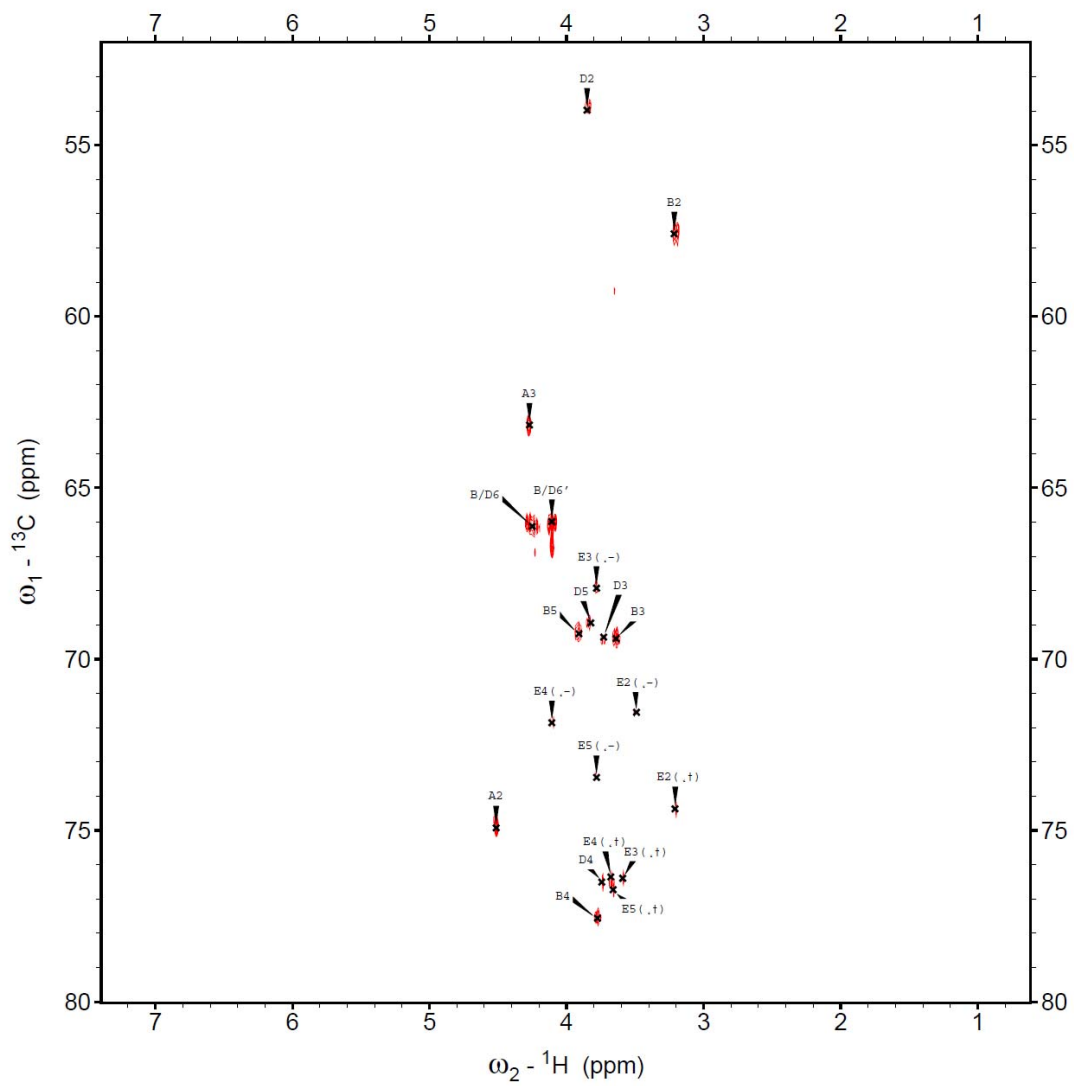

**5 HMQC**



6a

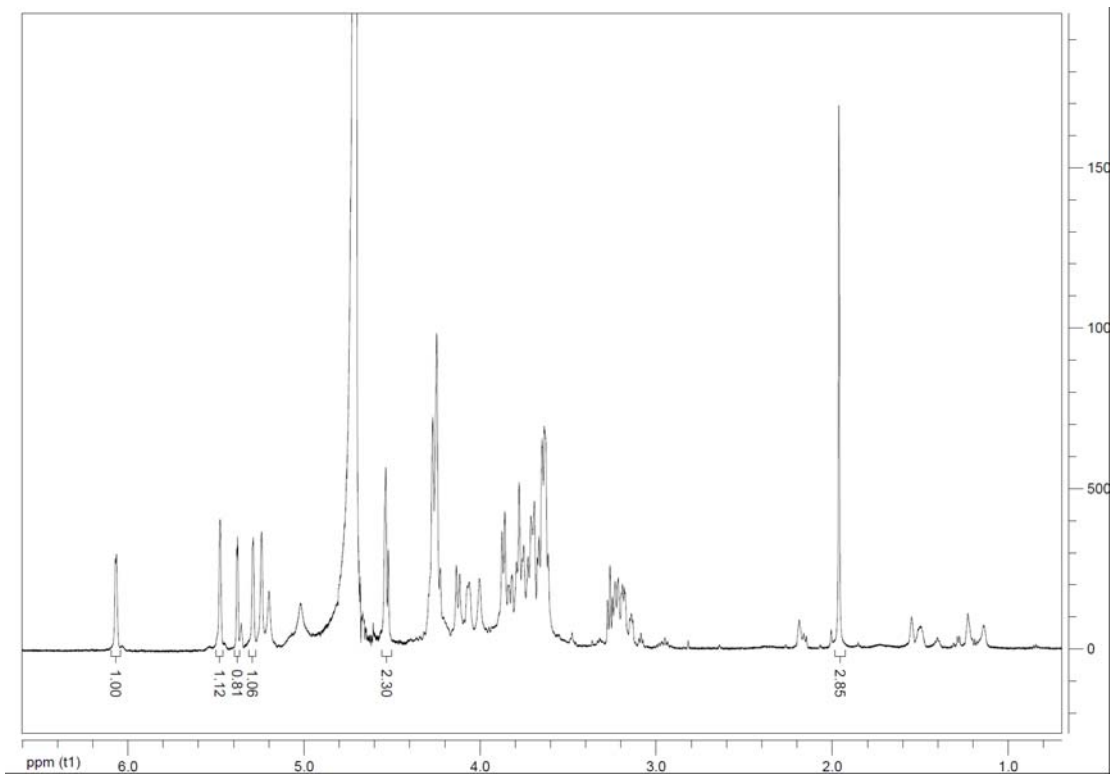

6a  $^1\text{H-NMR}$

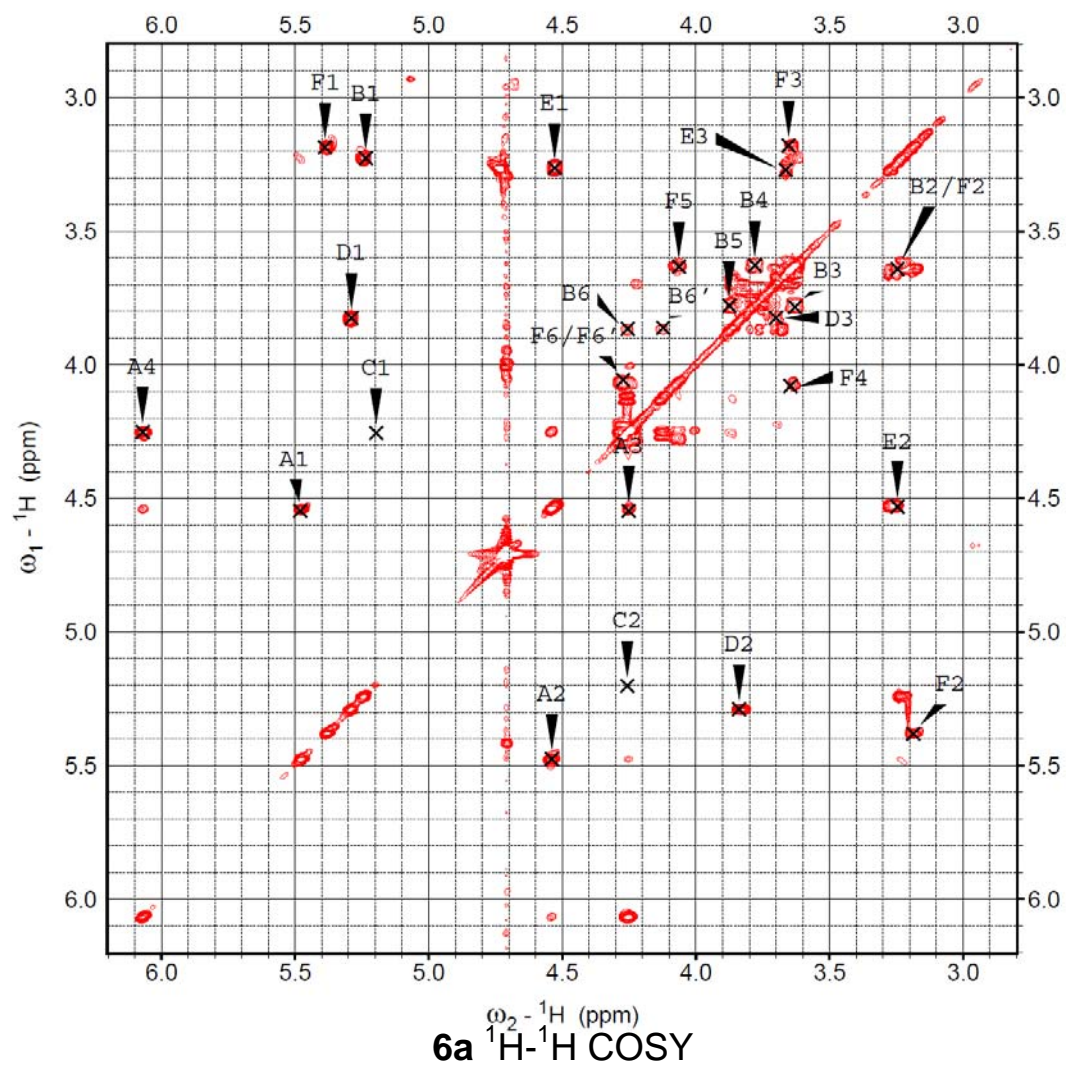

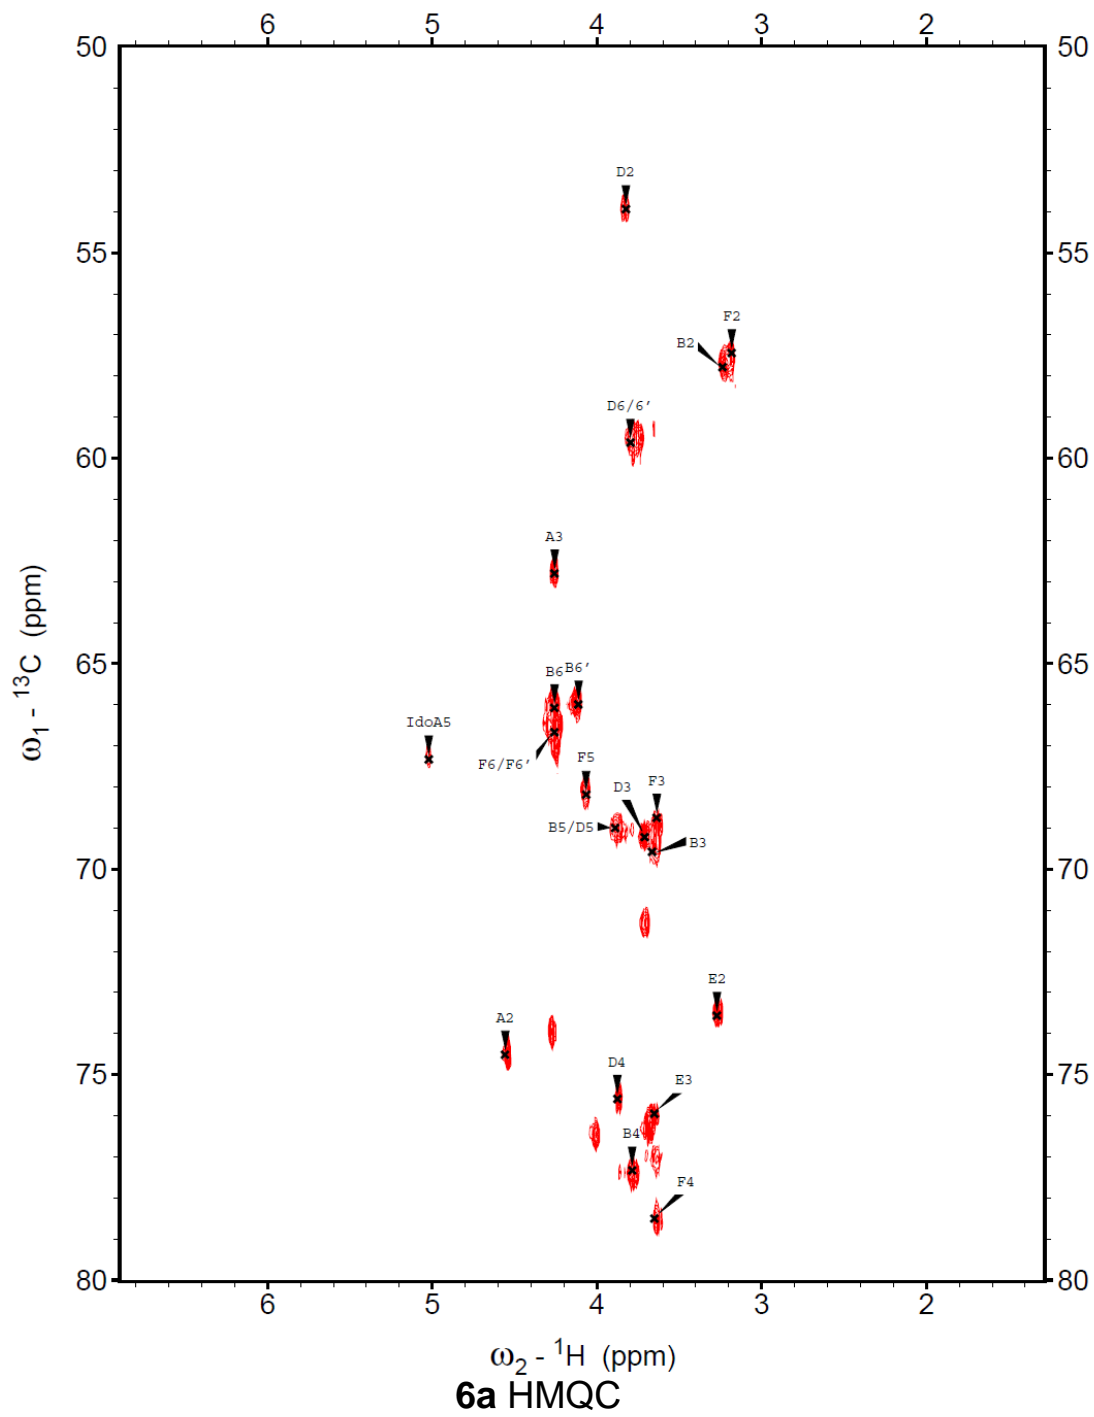

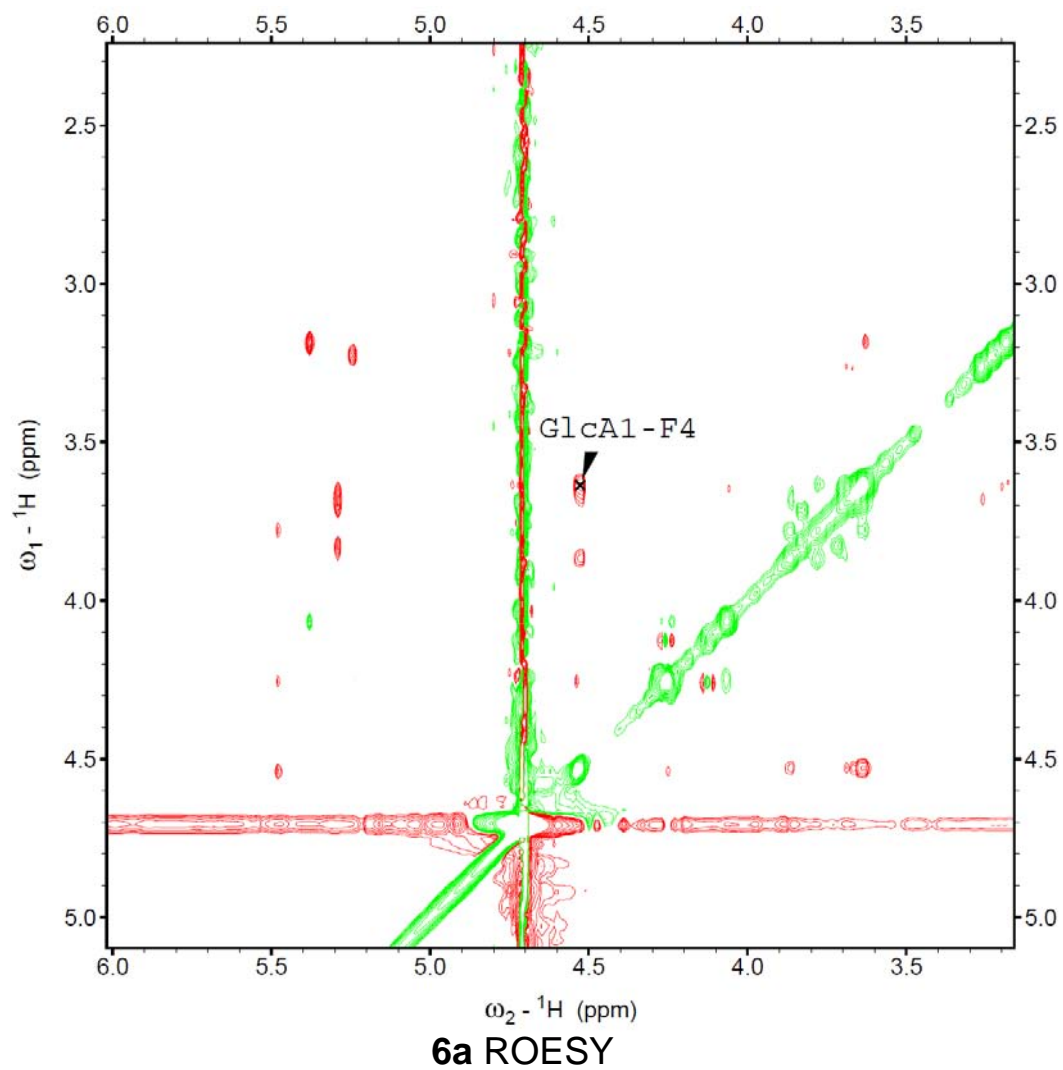

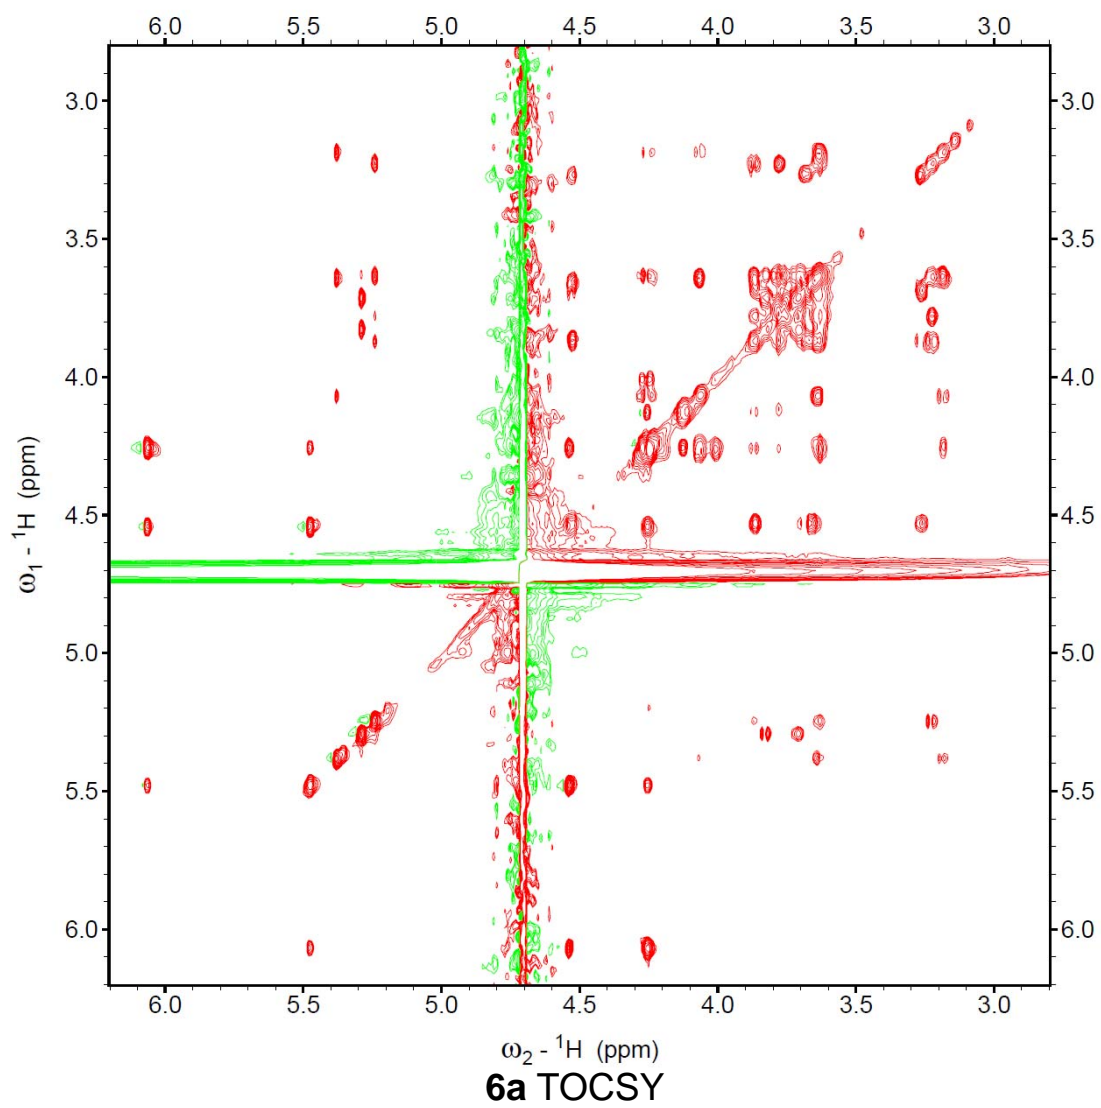

6b

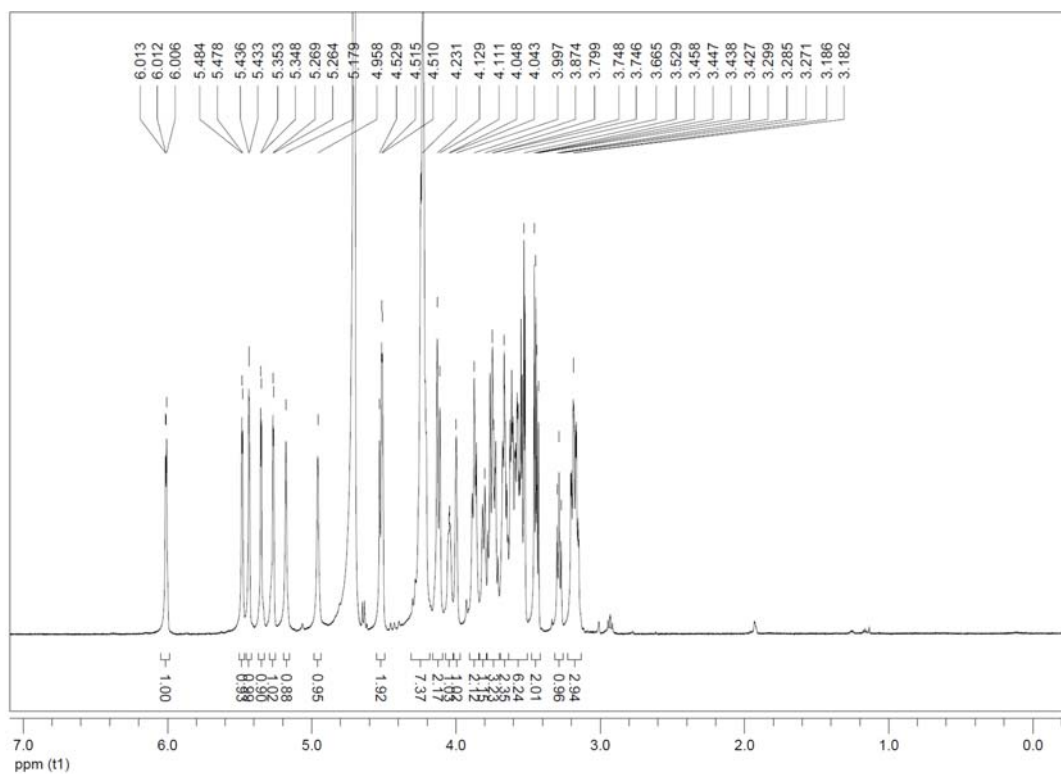

6b <sup>1</sup>H-NMR

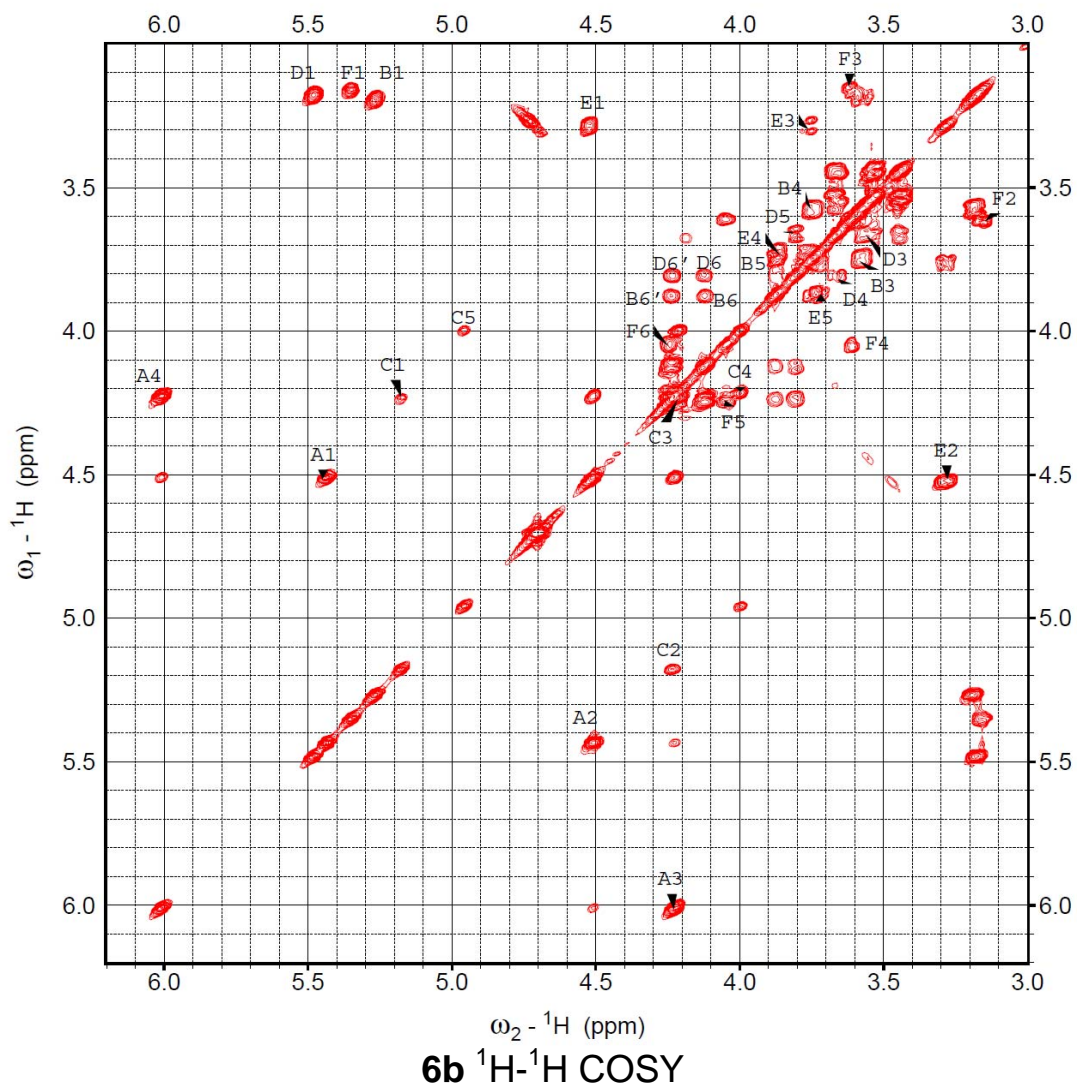

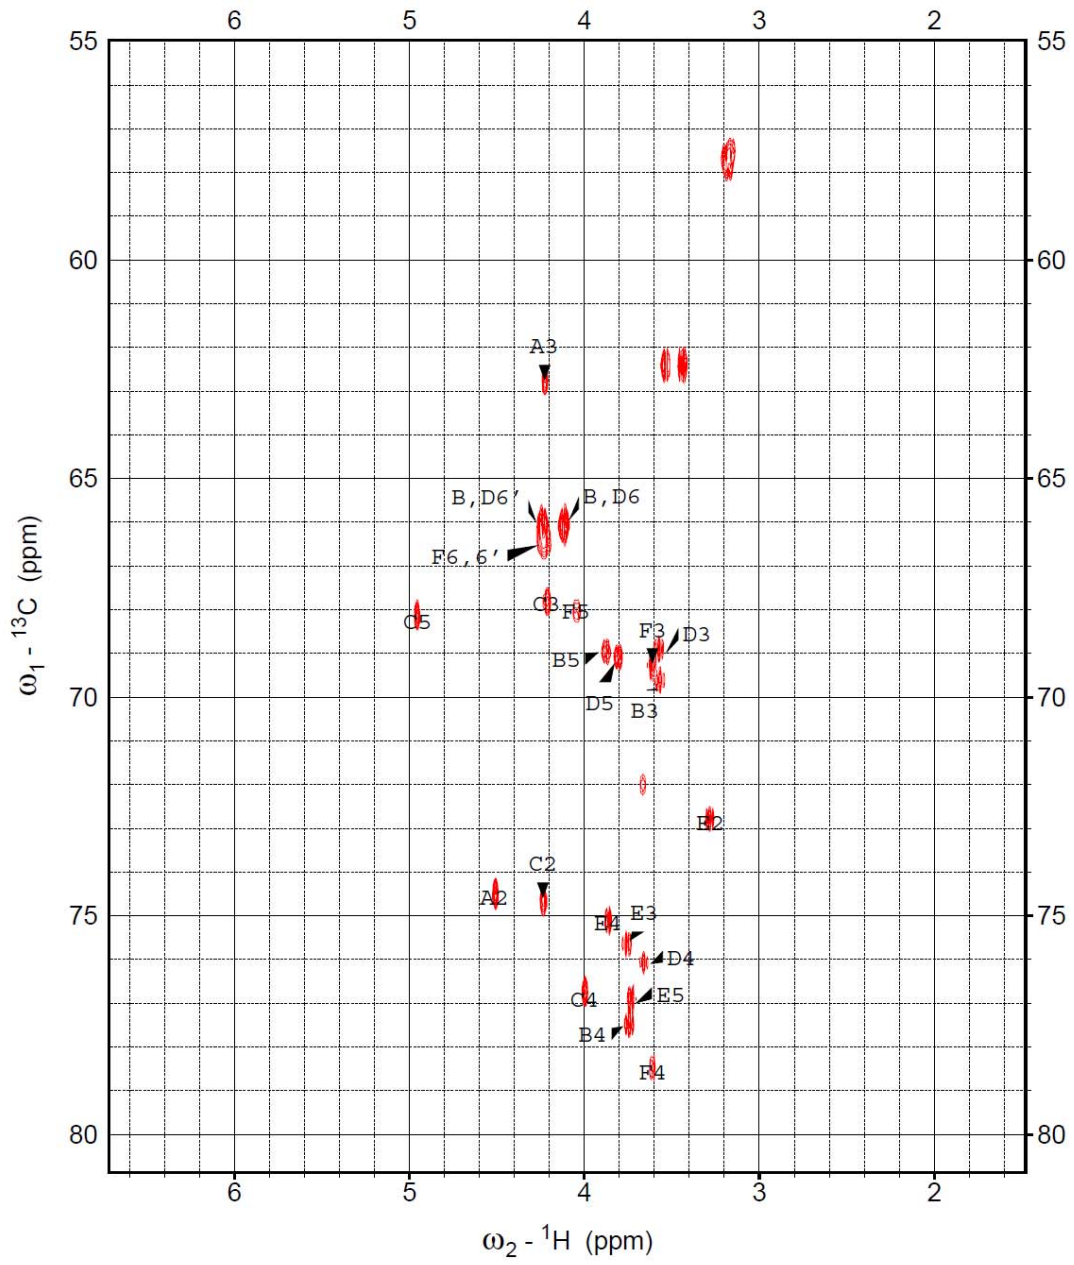

**6b** HMQC



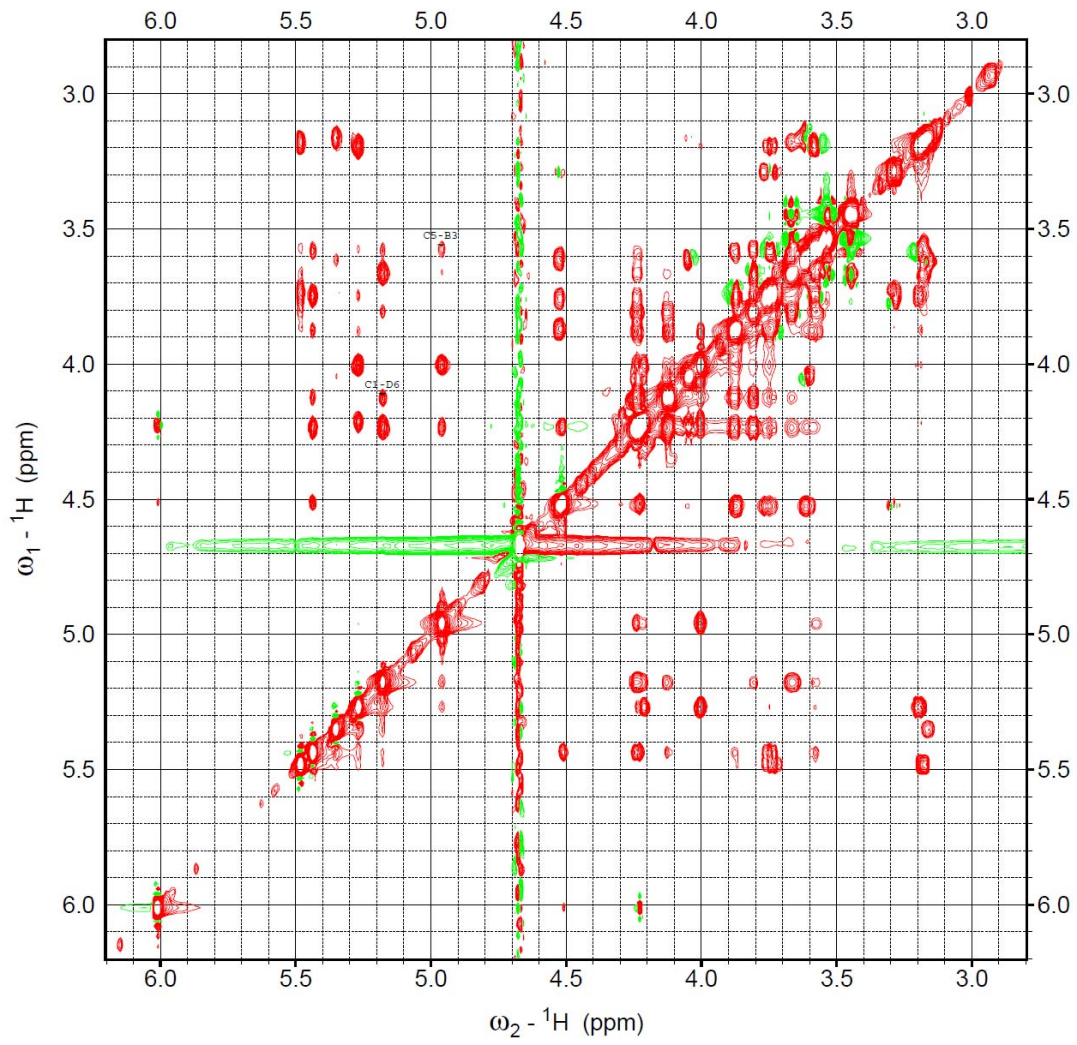

**6b** NOESY

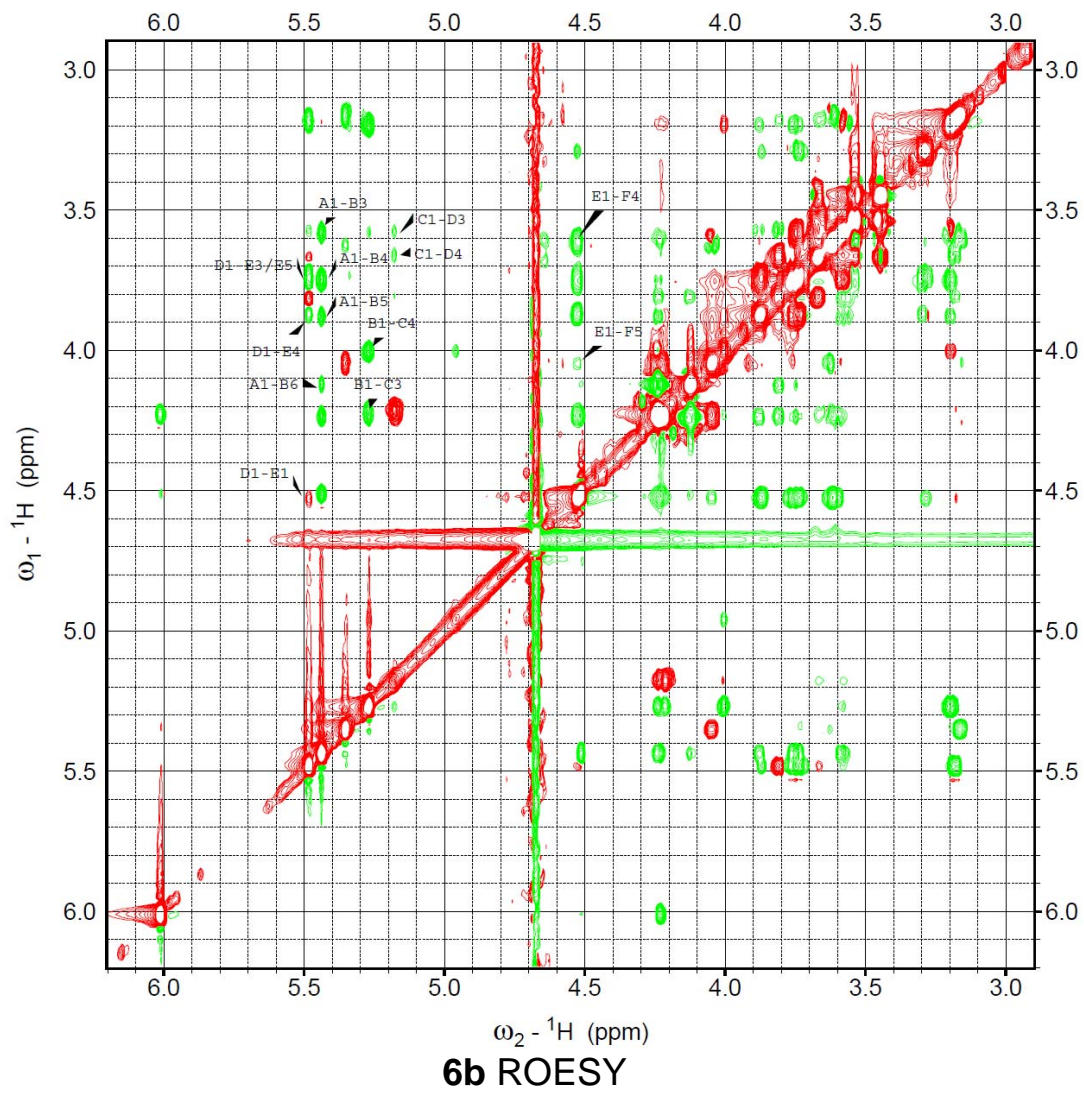

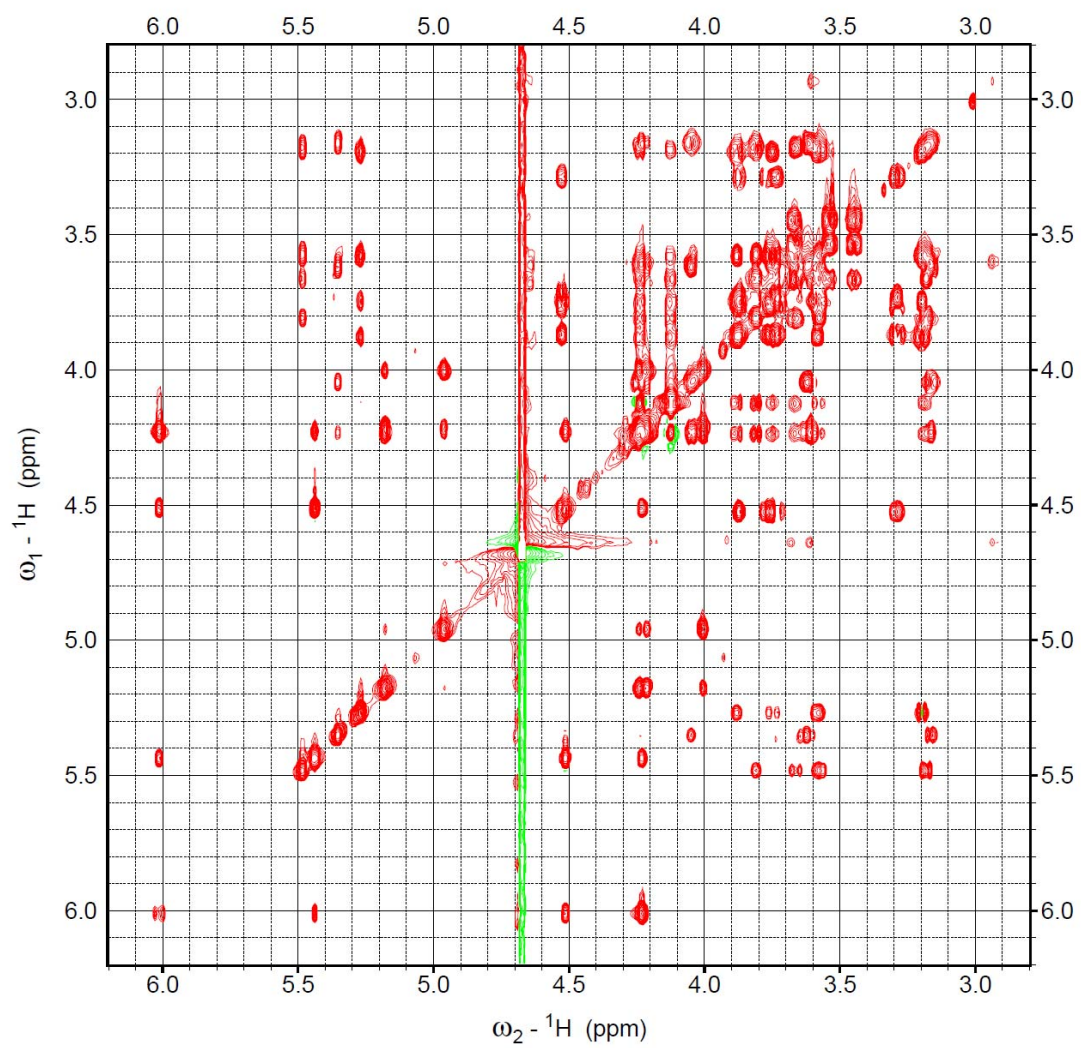

**6b** TOCSY

6c

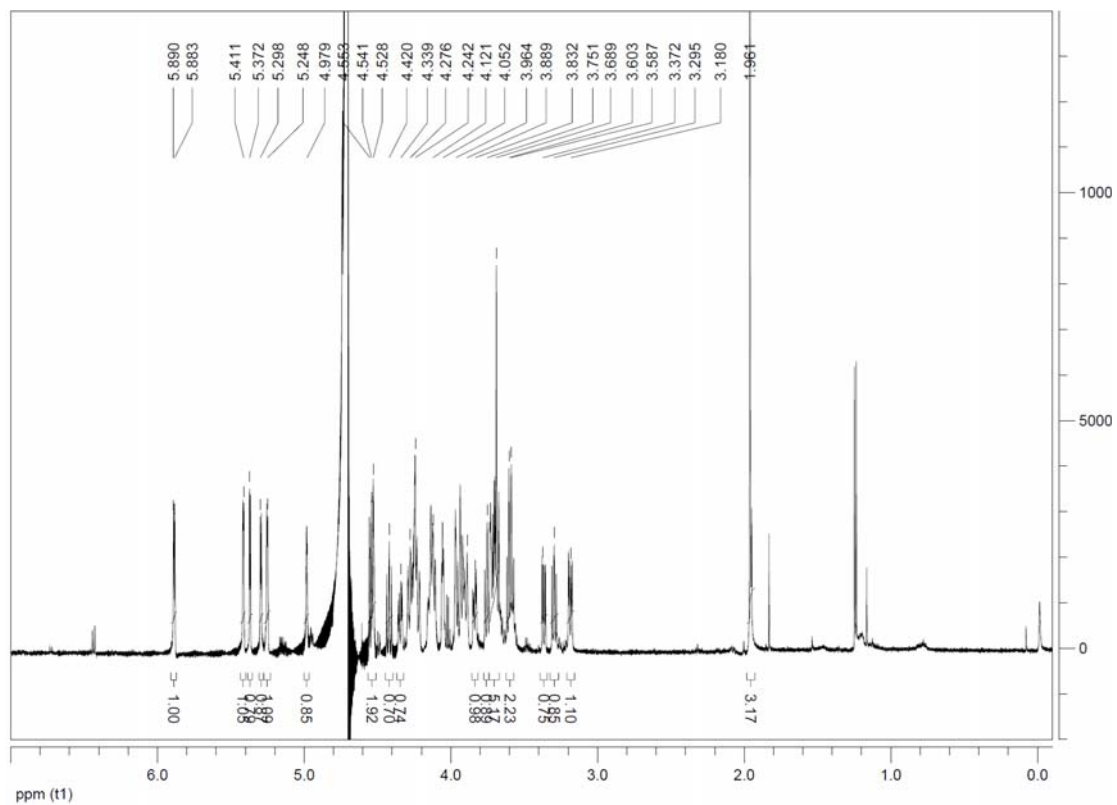

6c <sup>1</sup>H-NMR

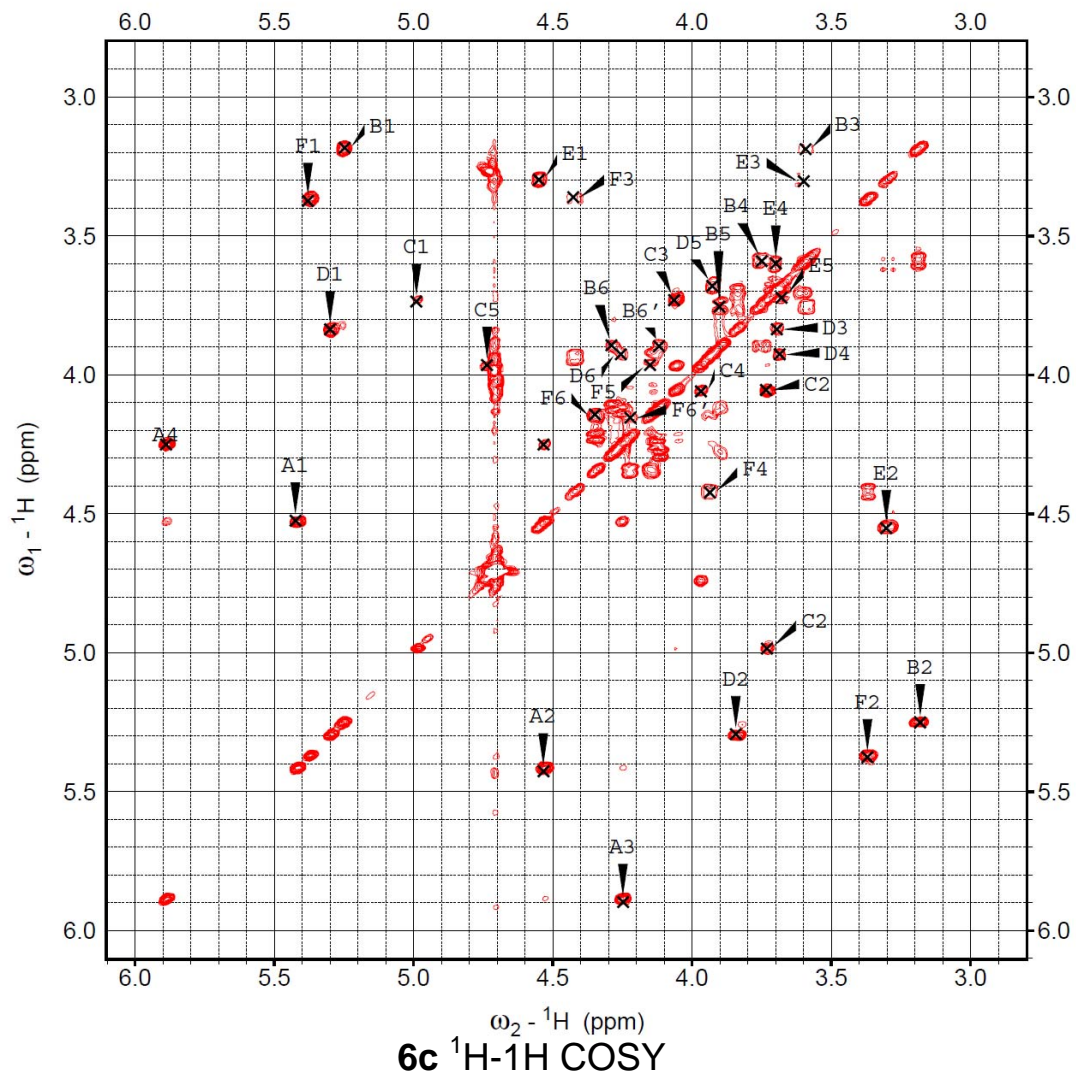

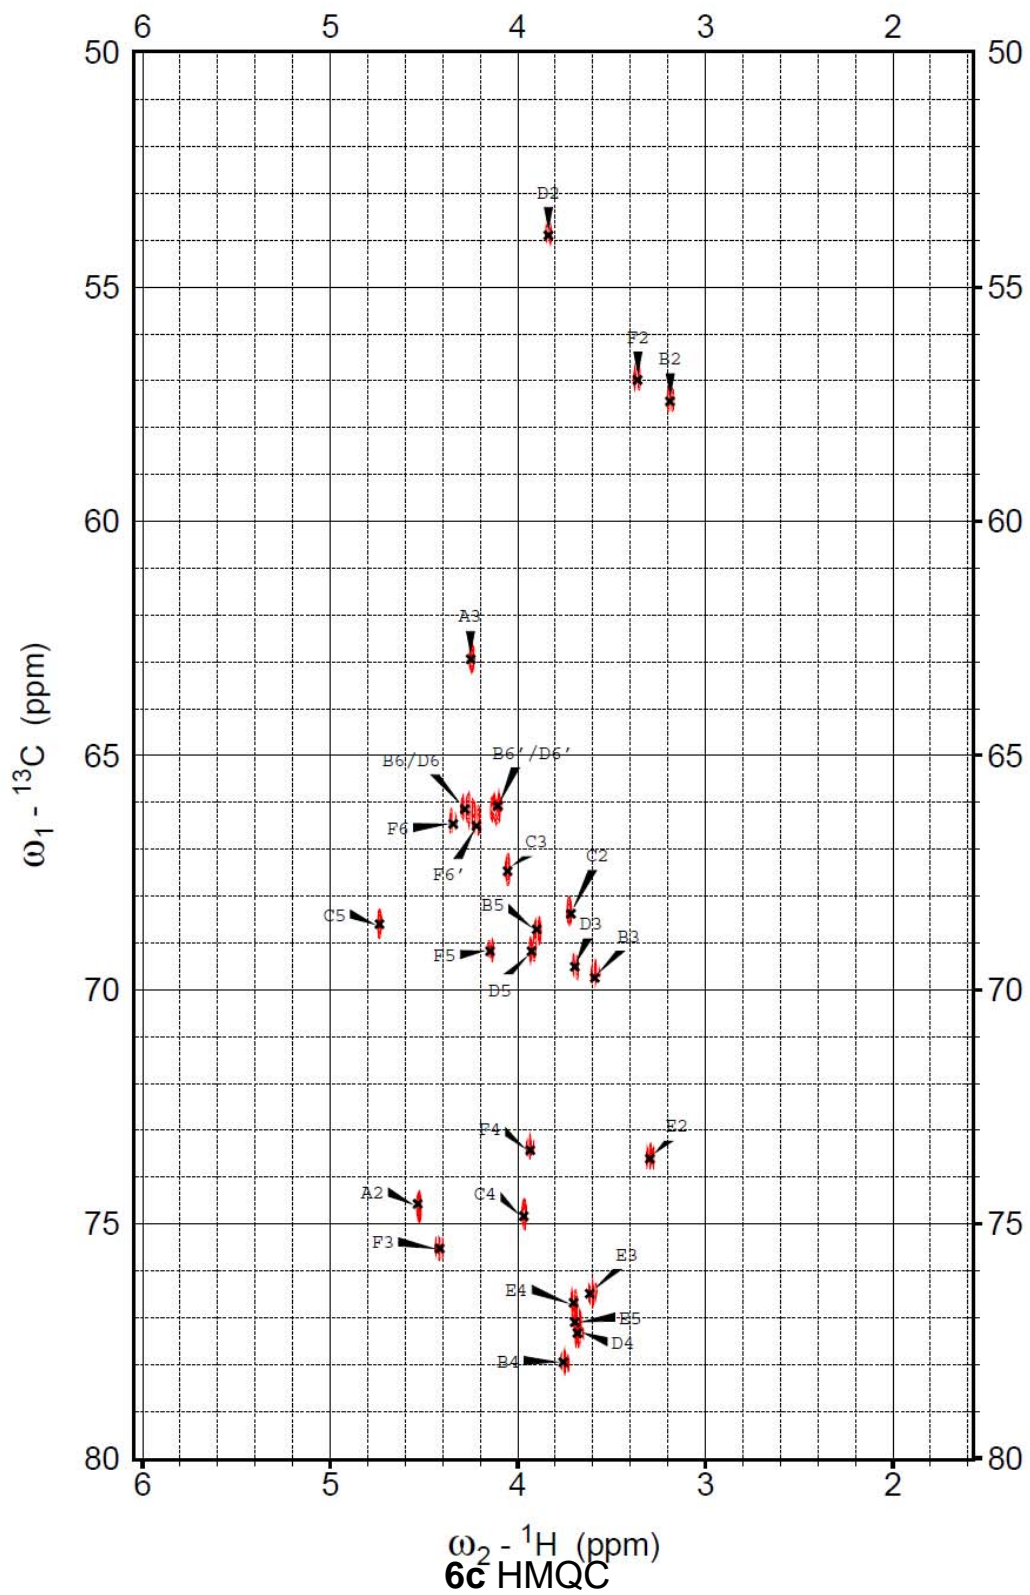

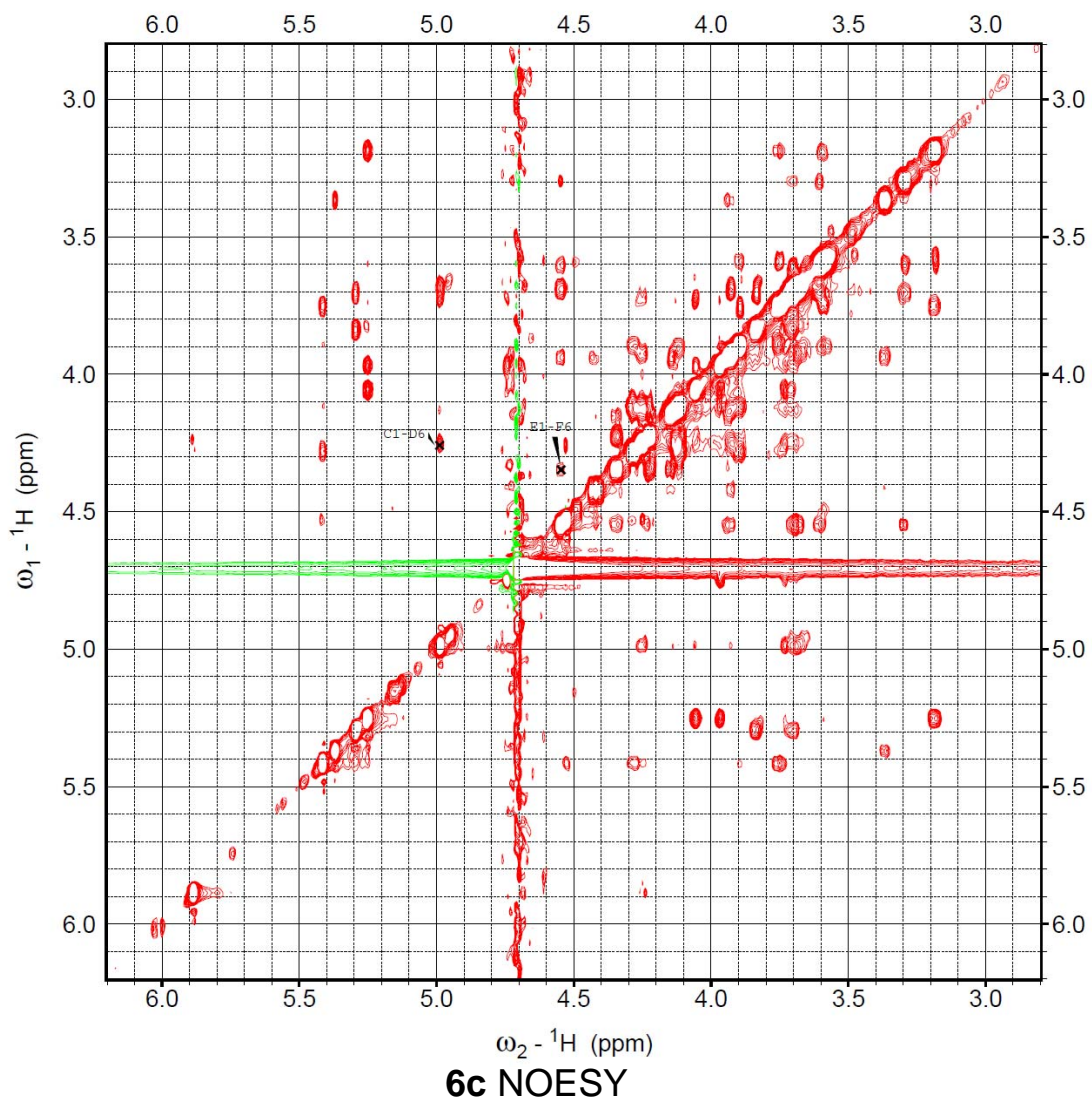

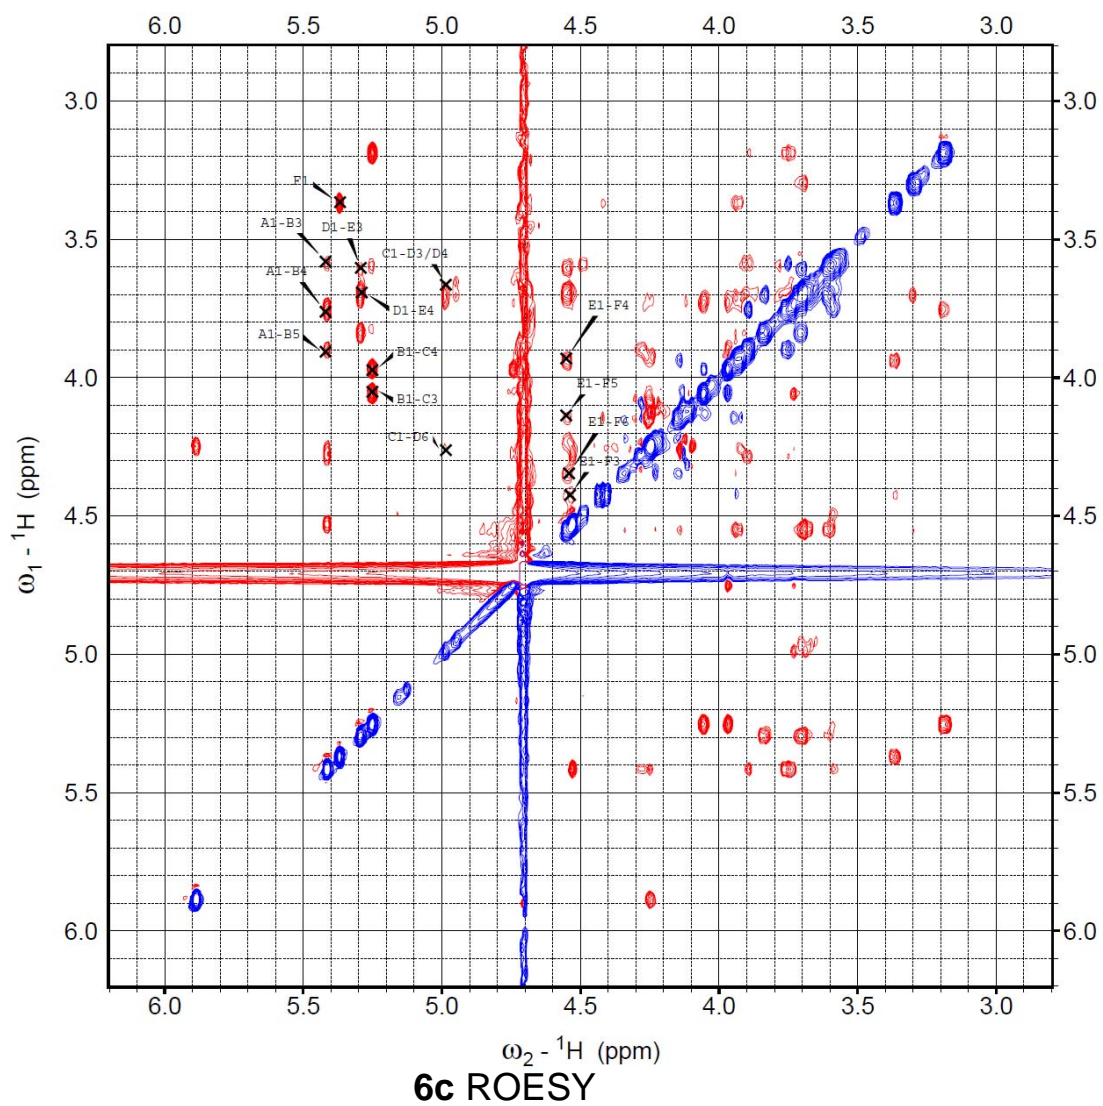



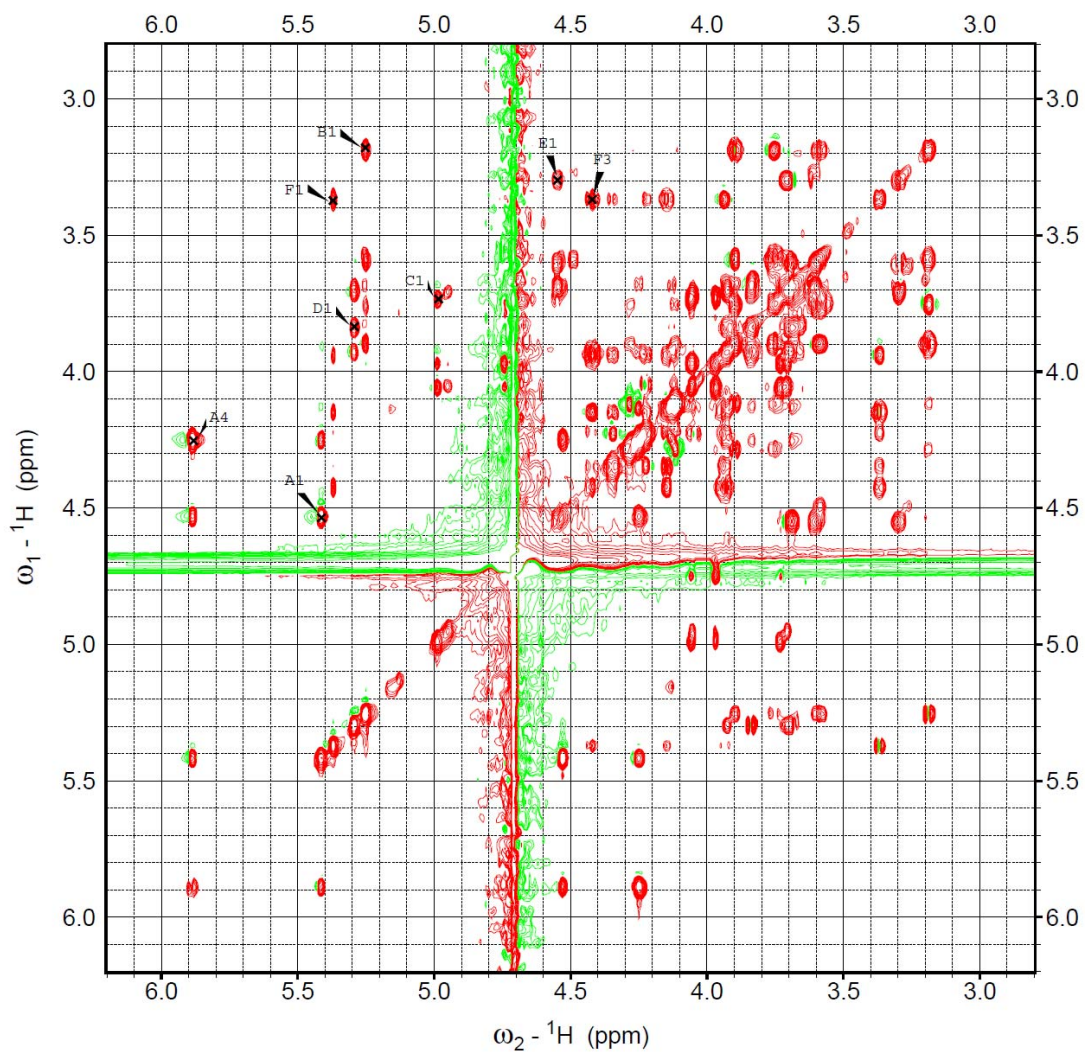

**6c** TOCSY

8a

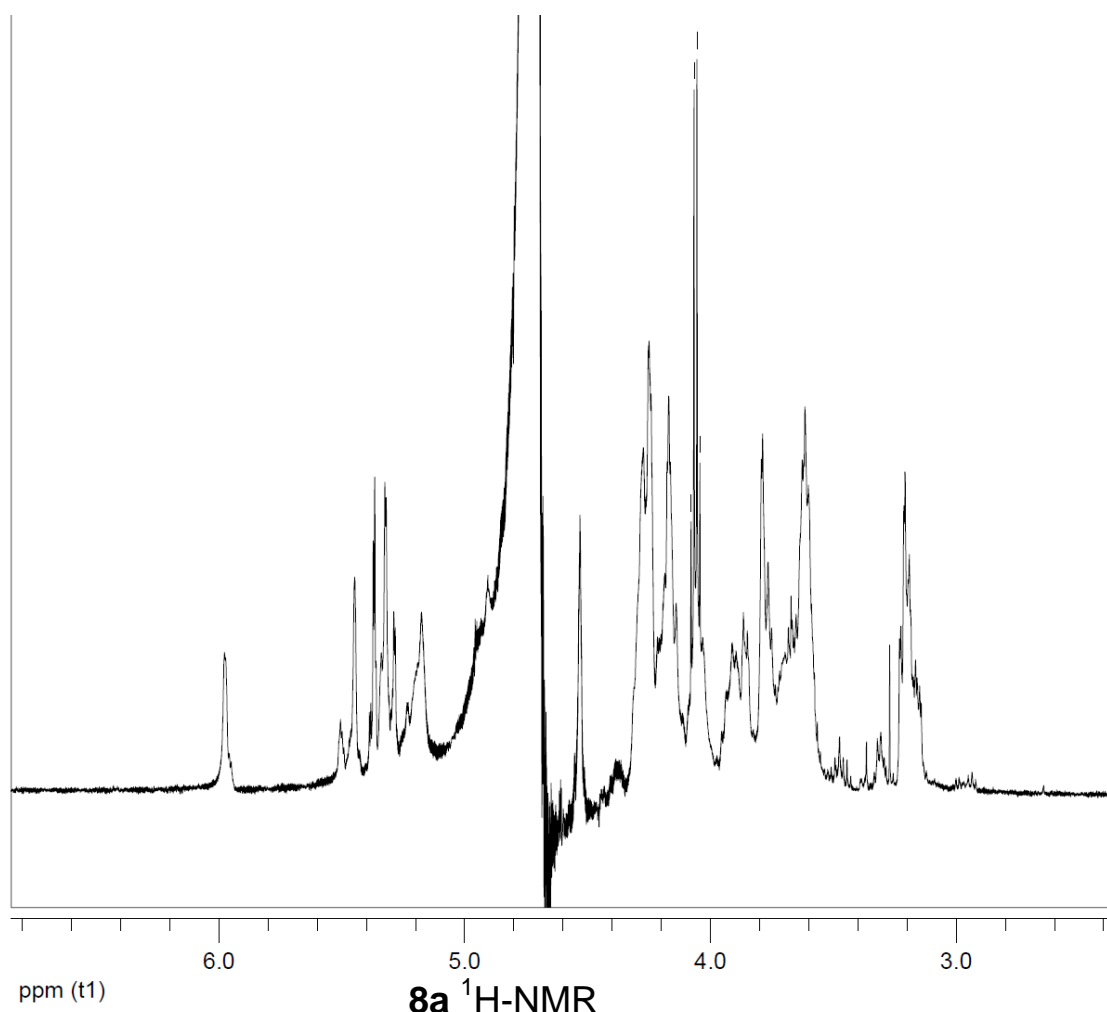

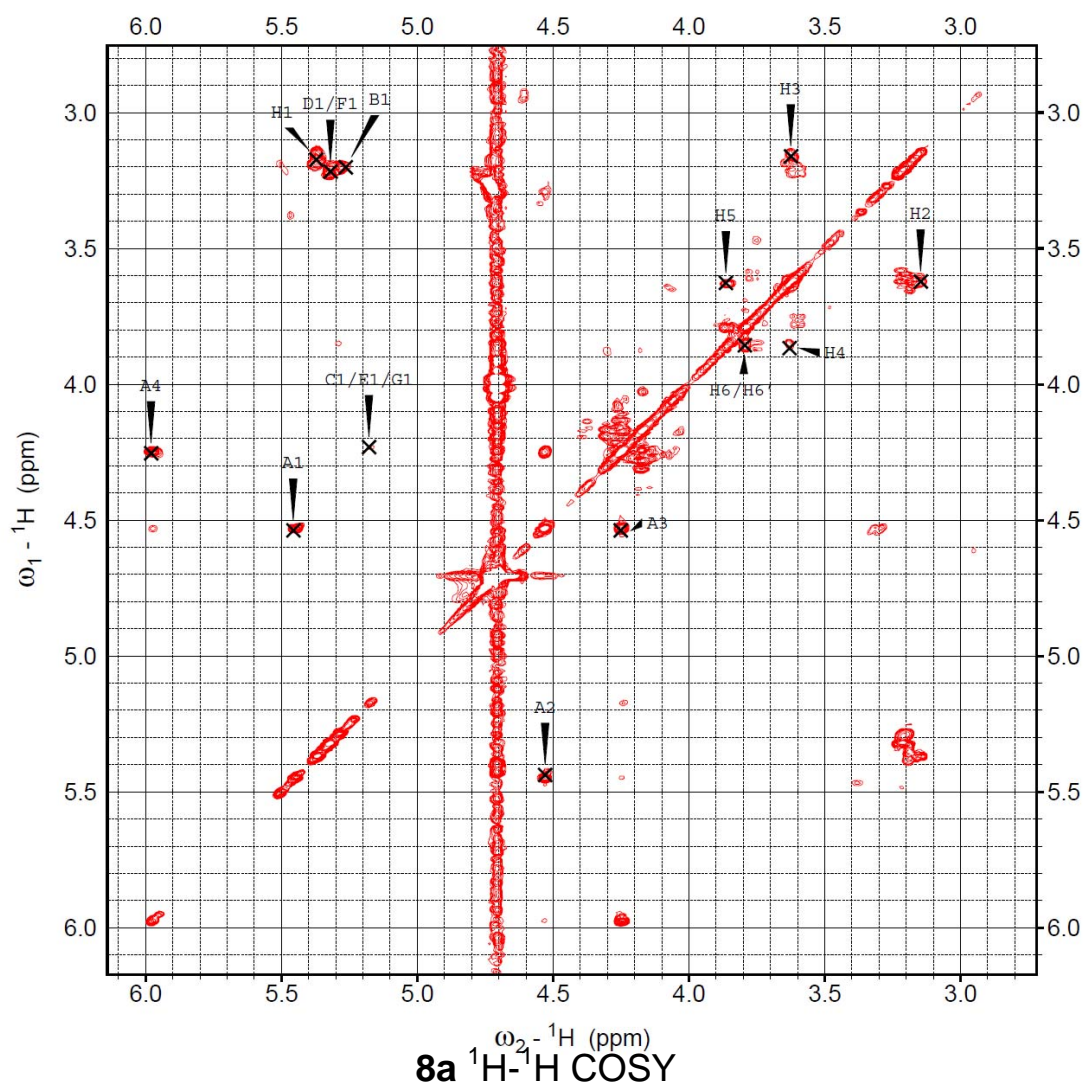

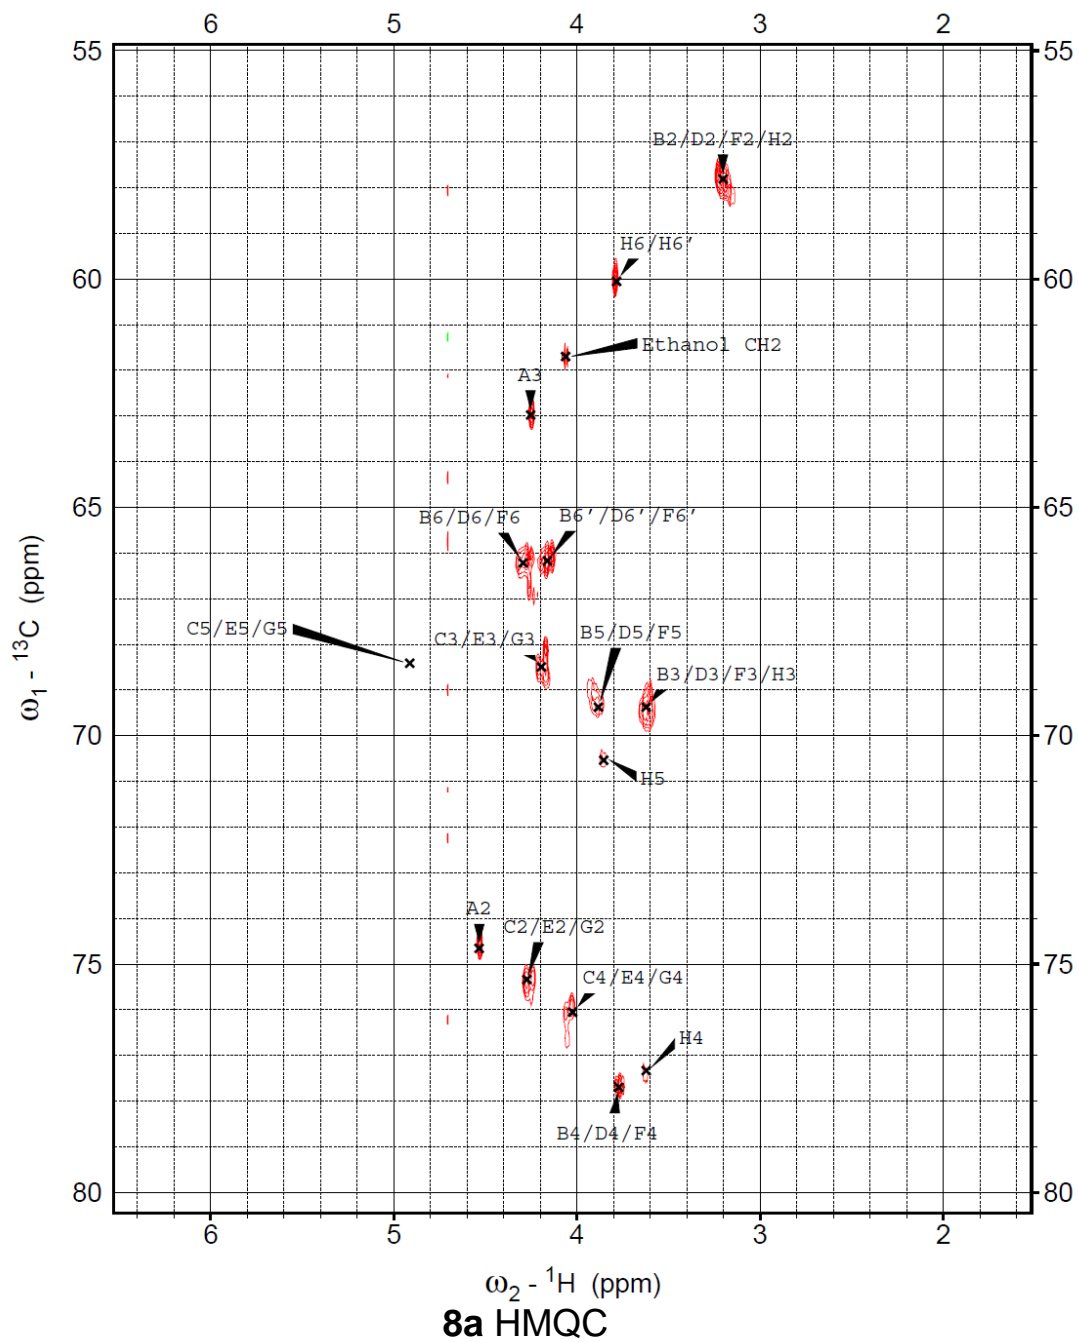

8b

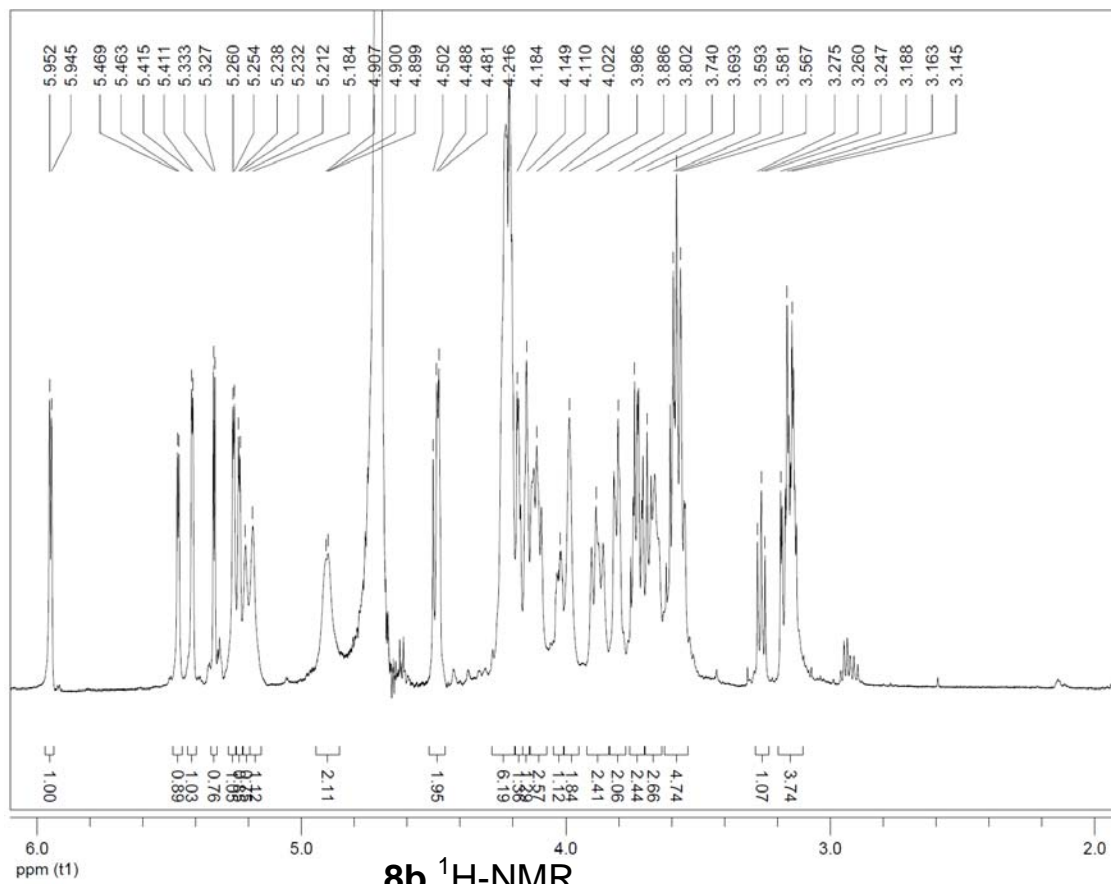

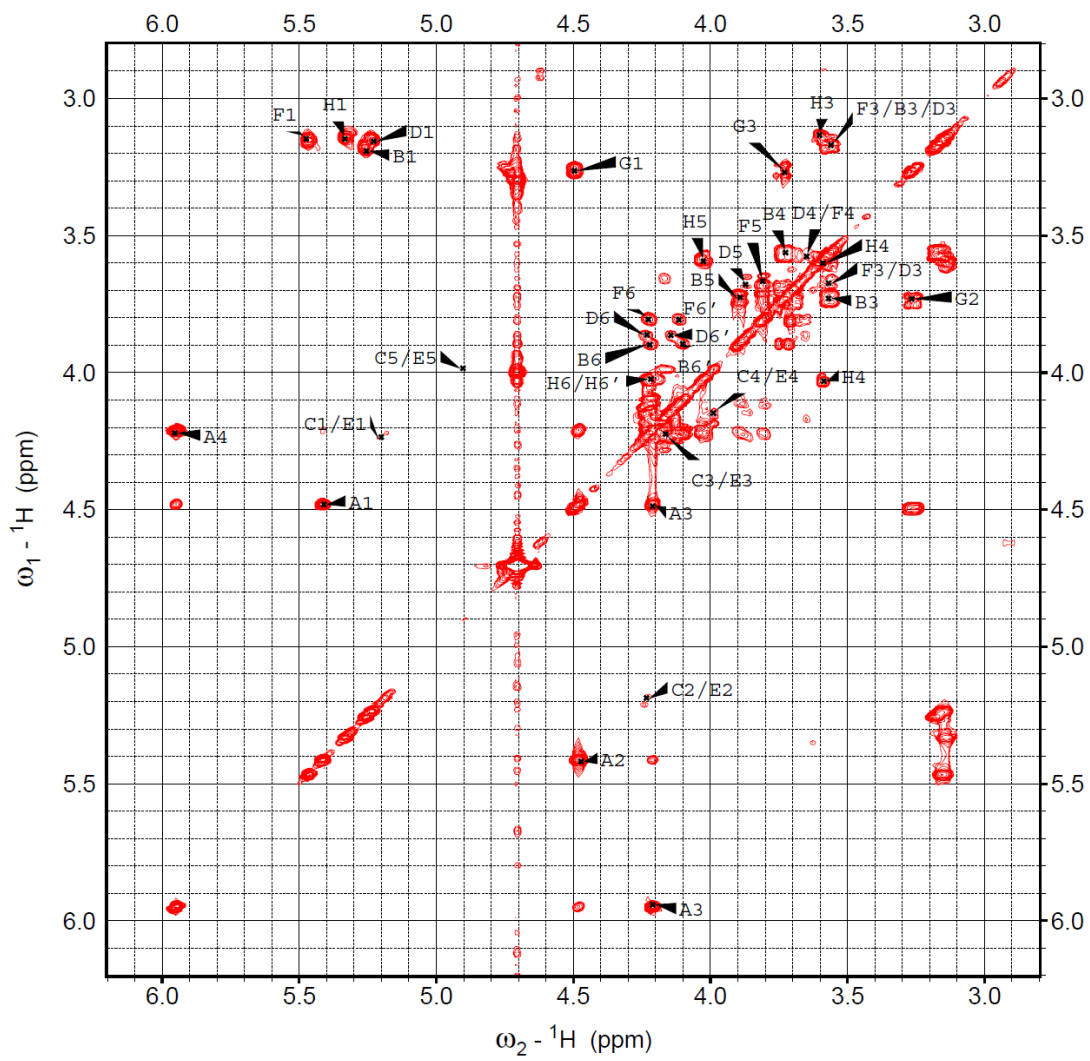

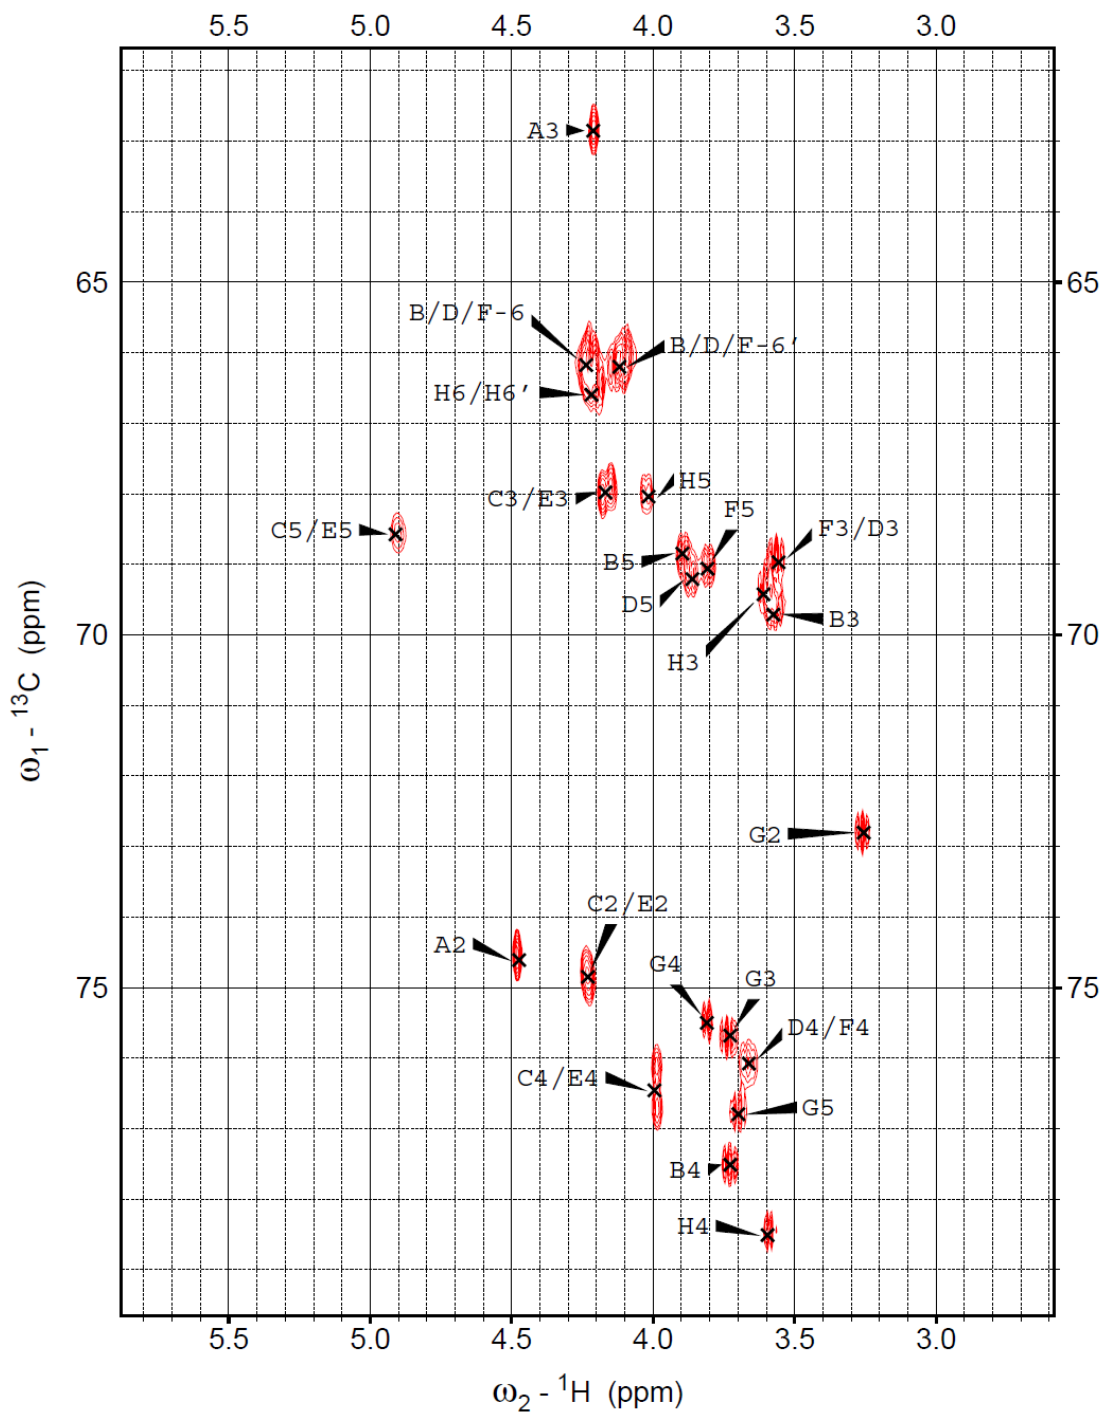

**8b HMQC**

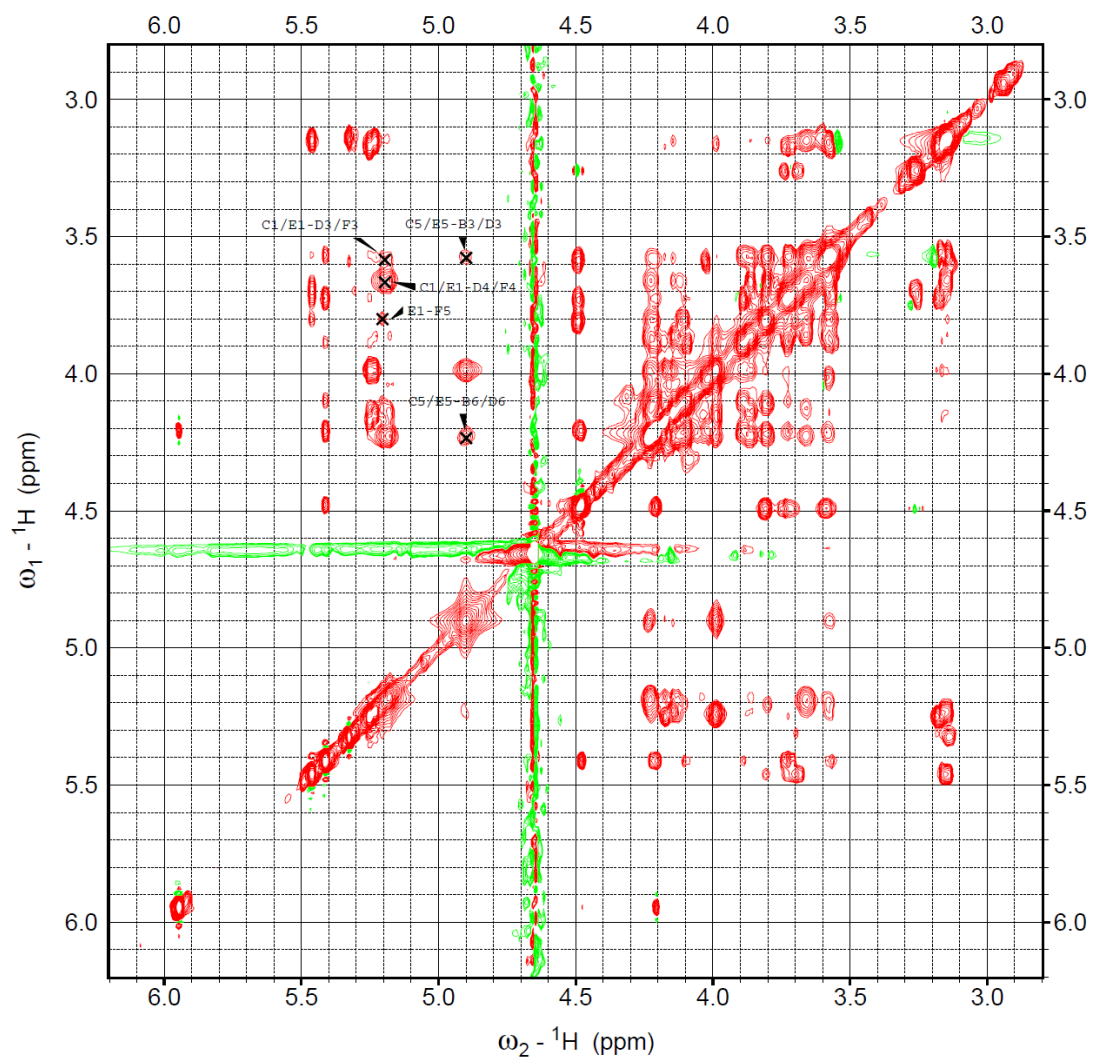

**8b** NOESY



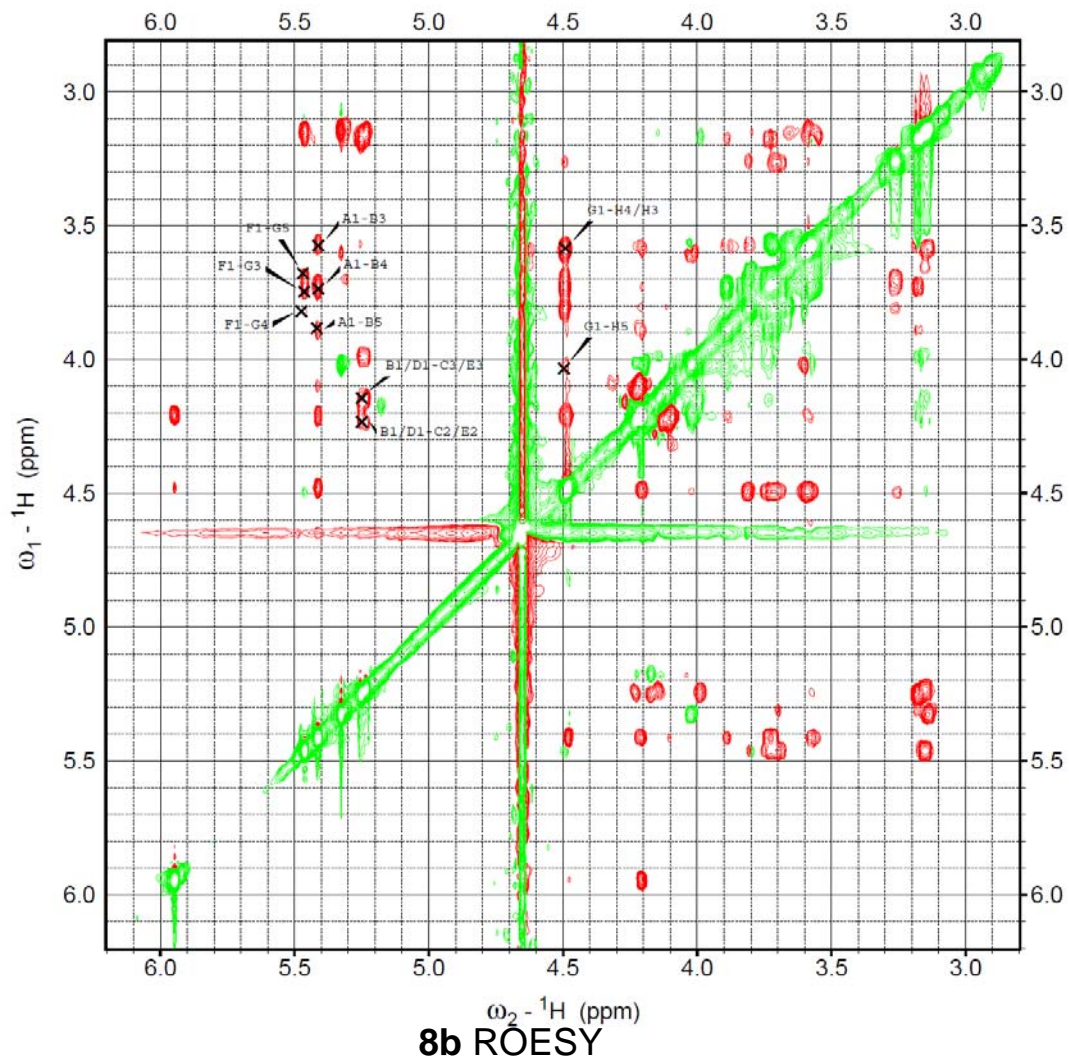

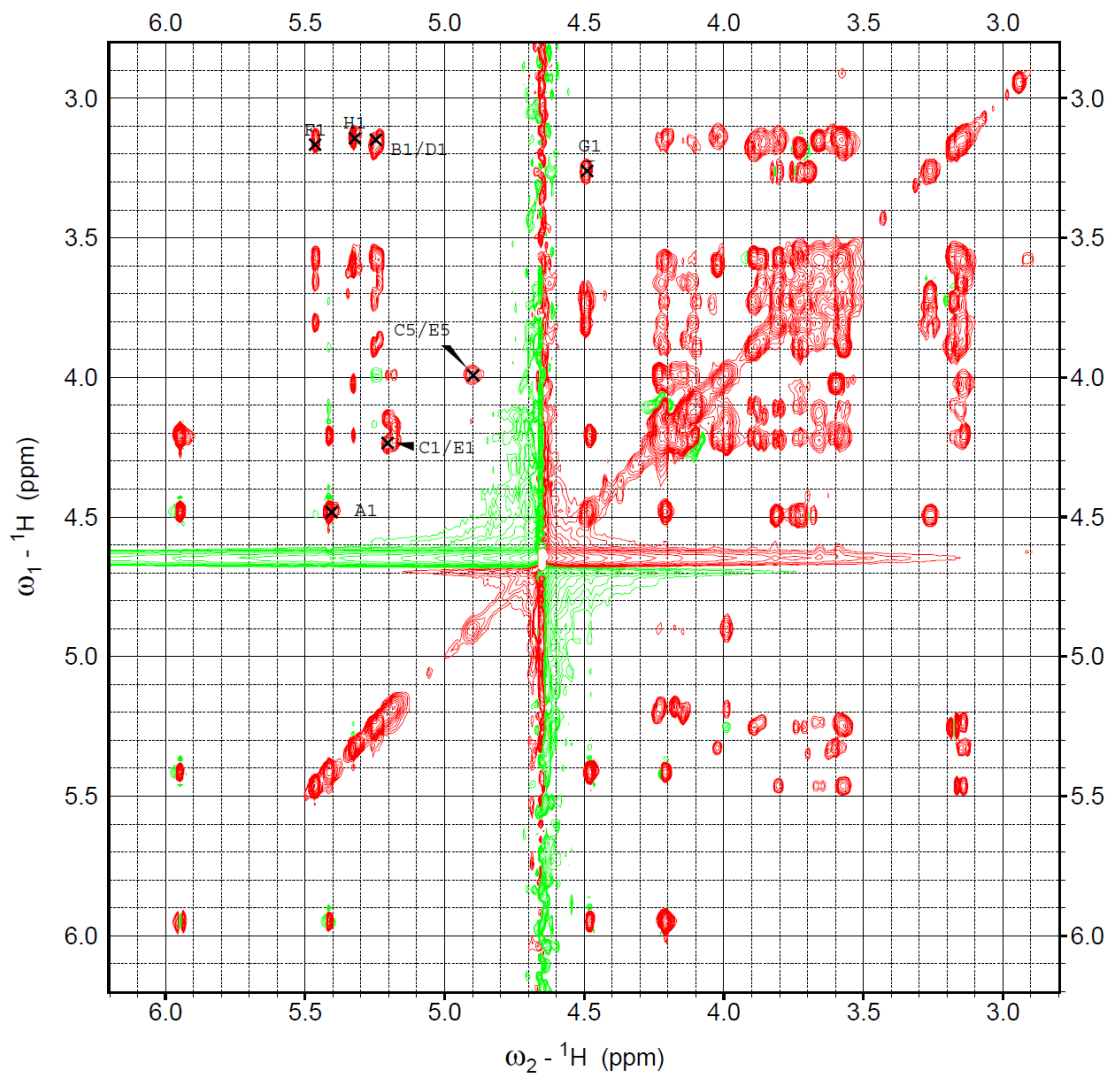

**8b TOCSY**

8c

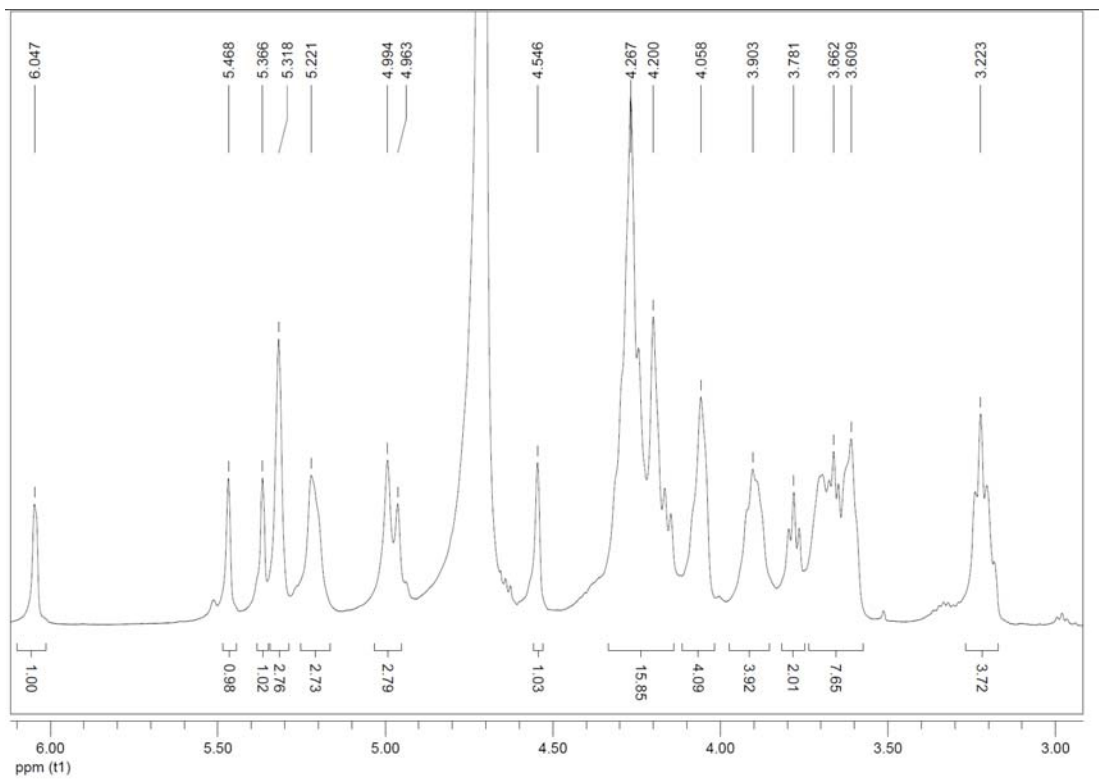

8c <sup>1</sup>H-NMR

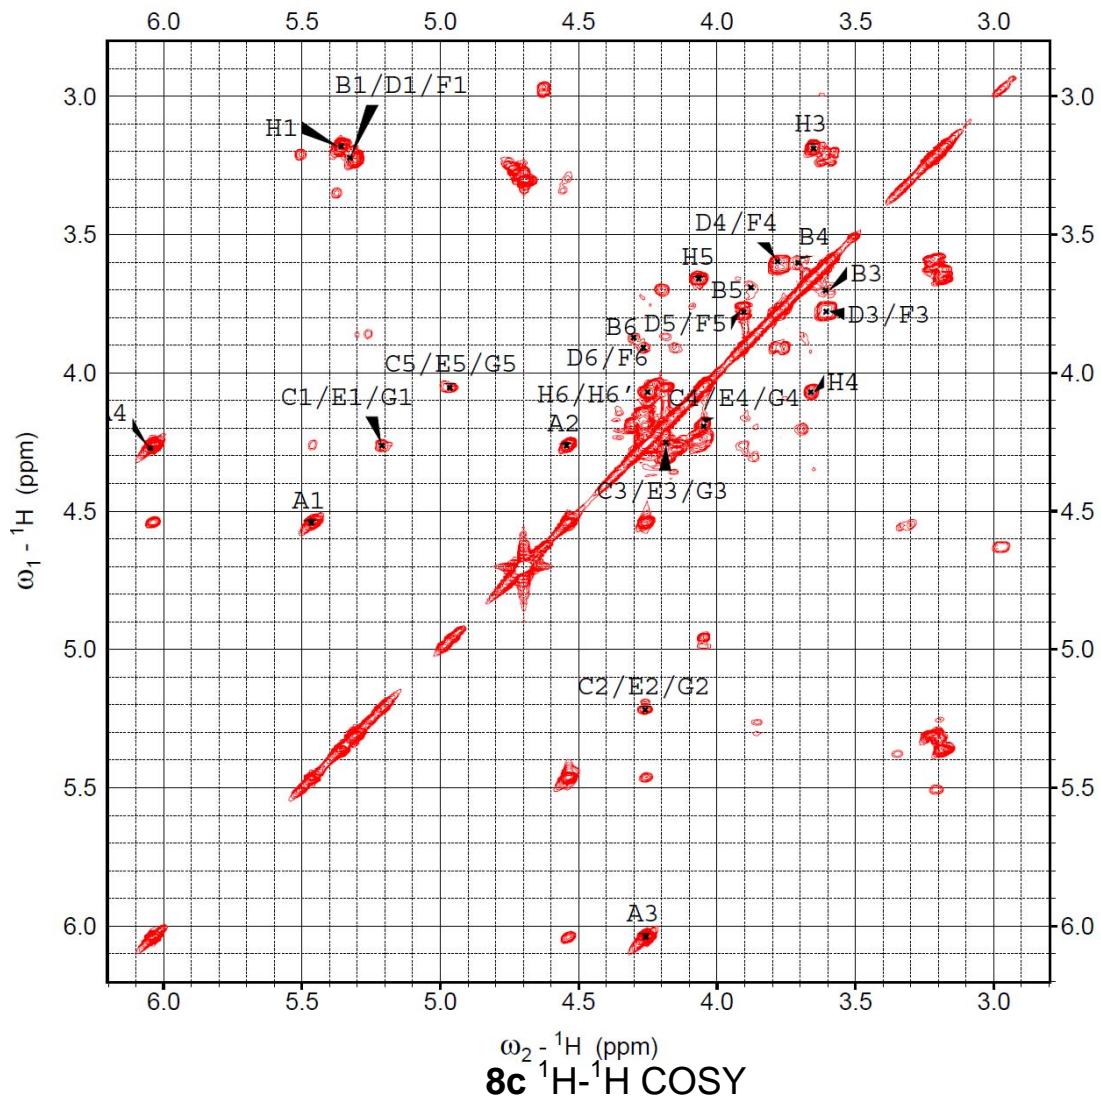

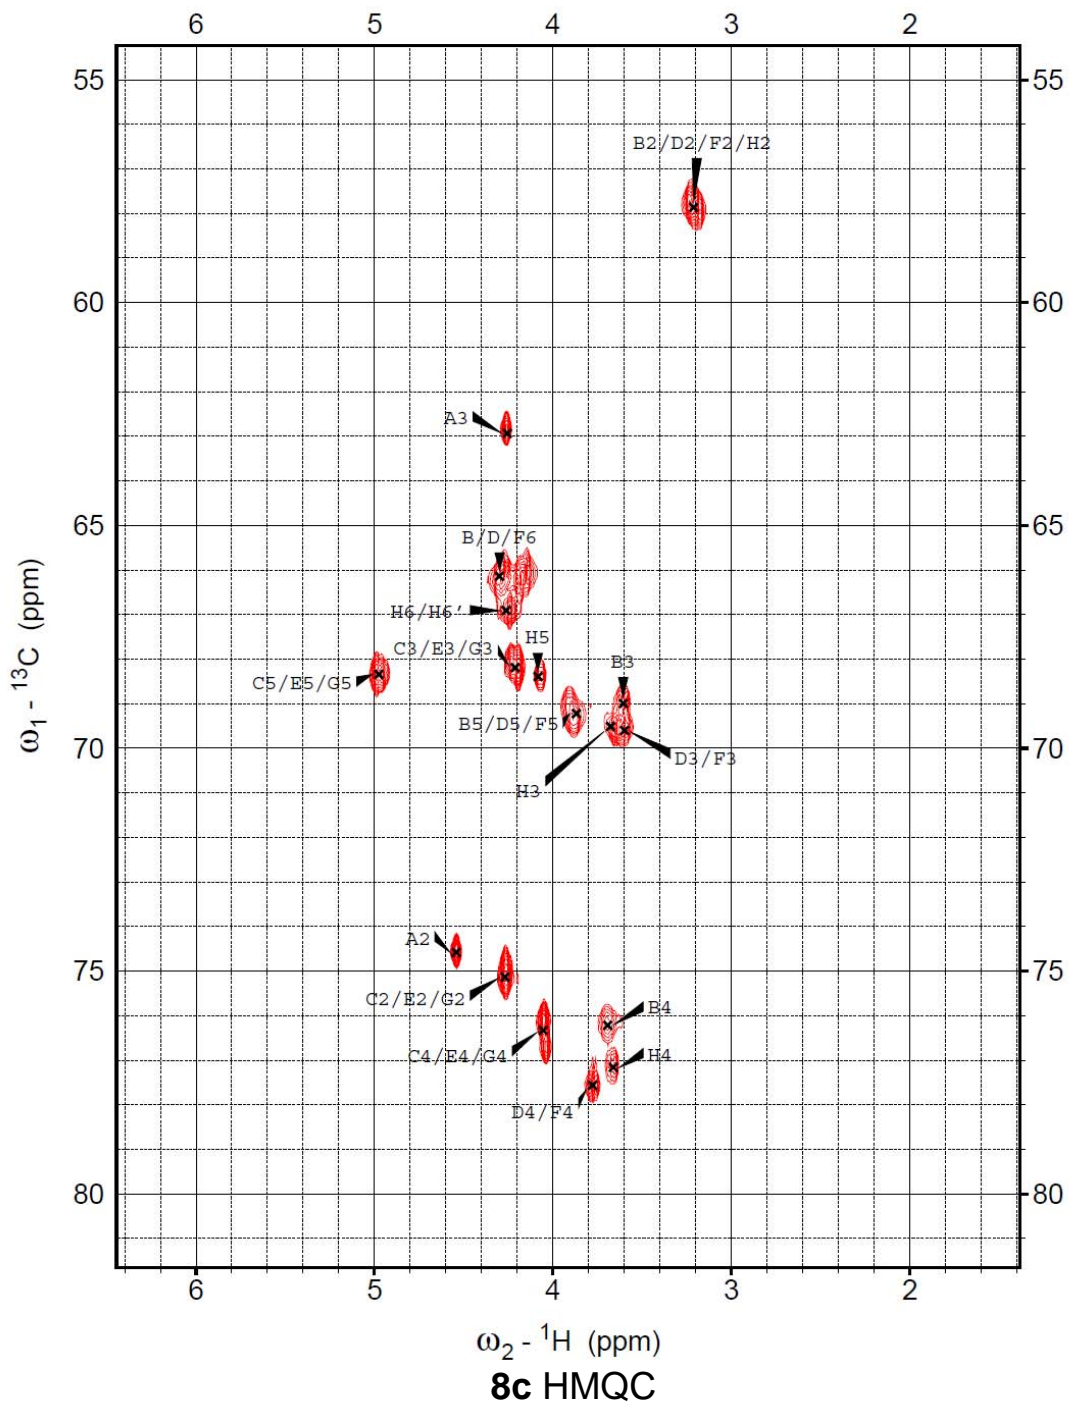

8d

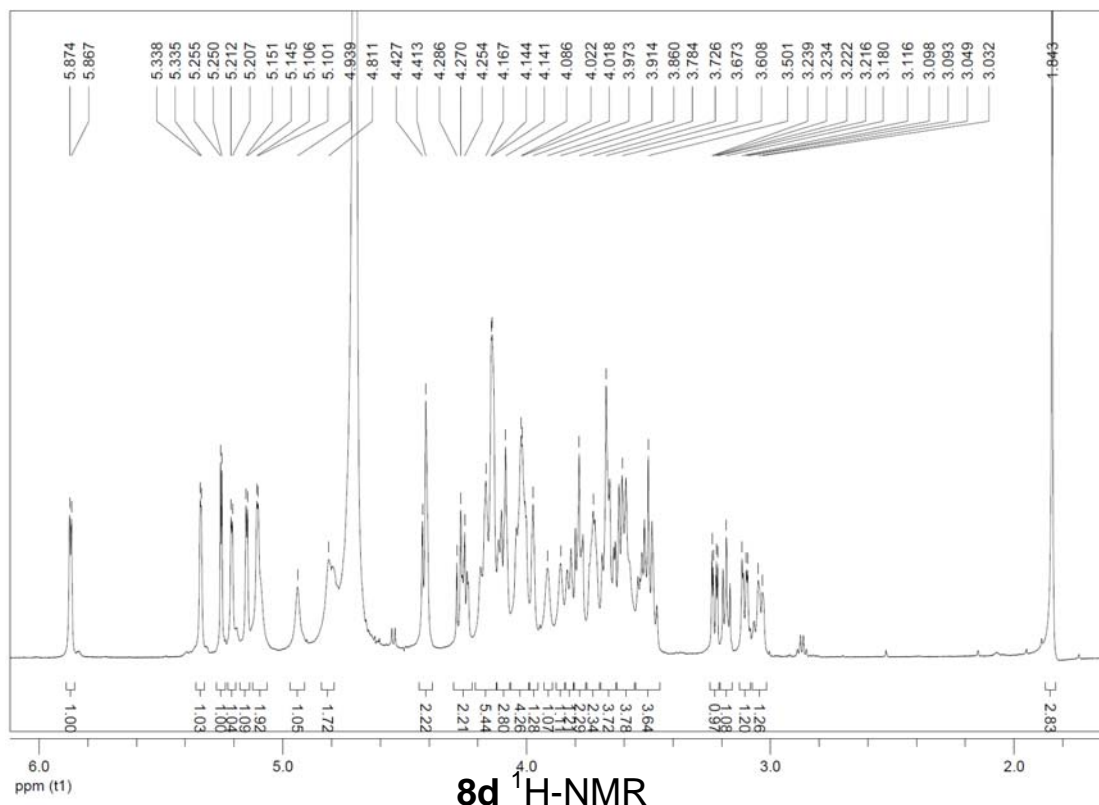

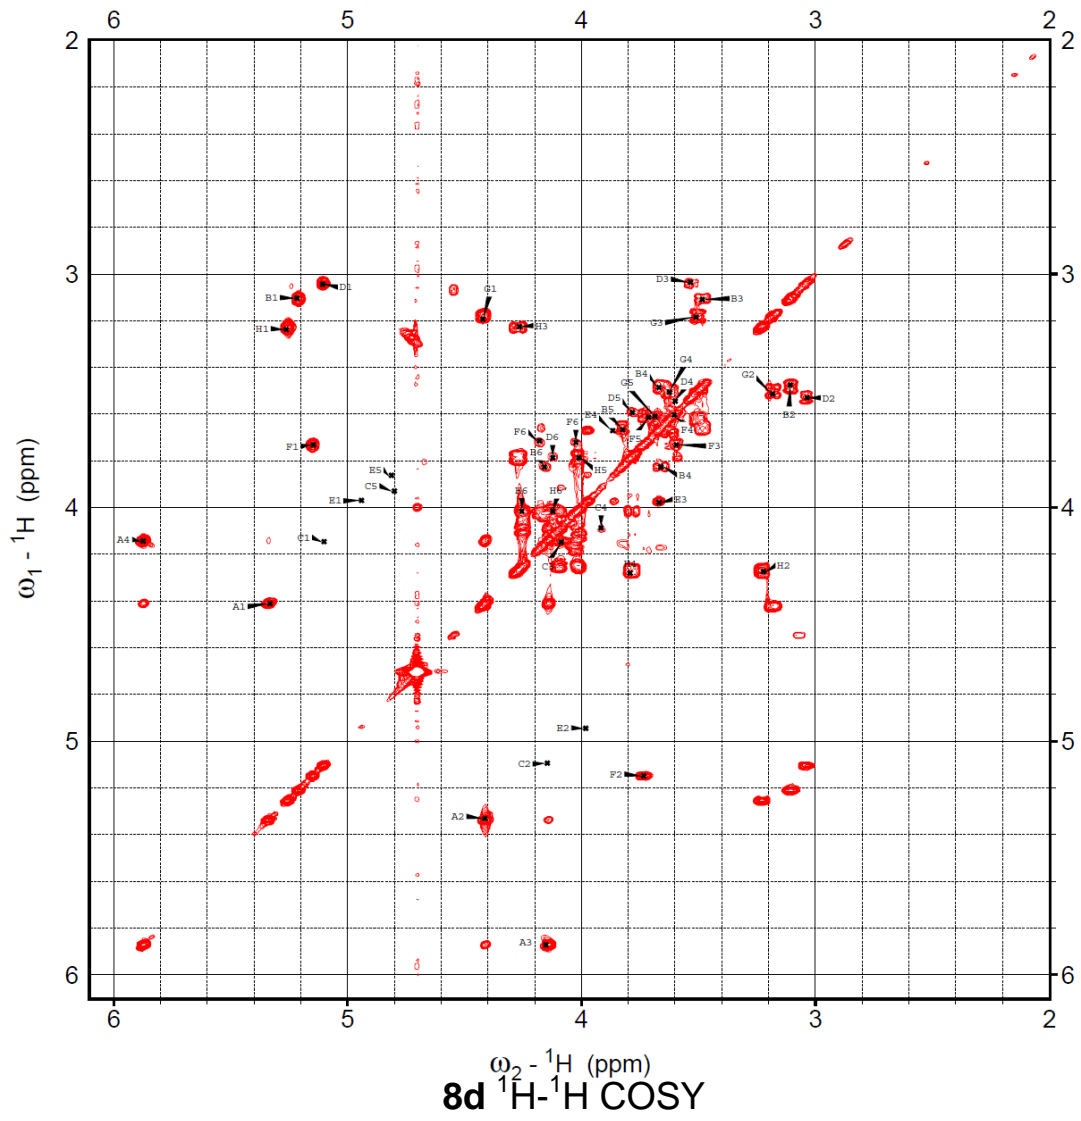

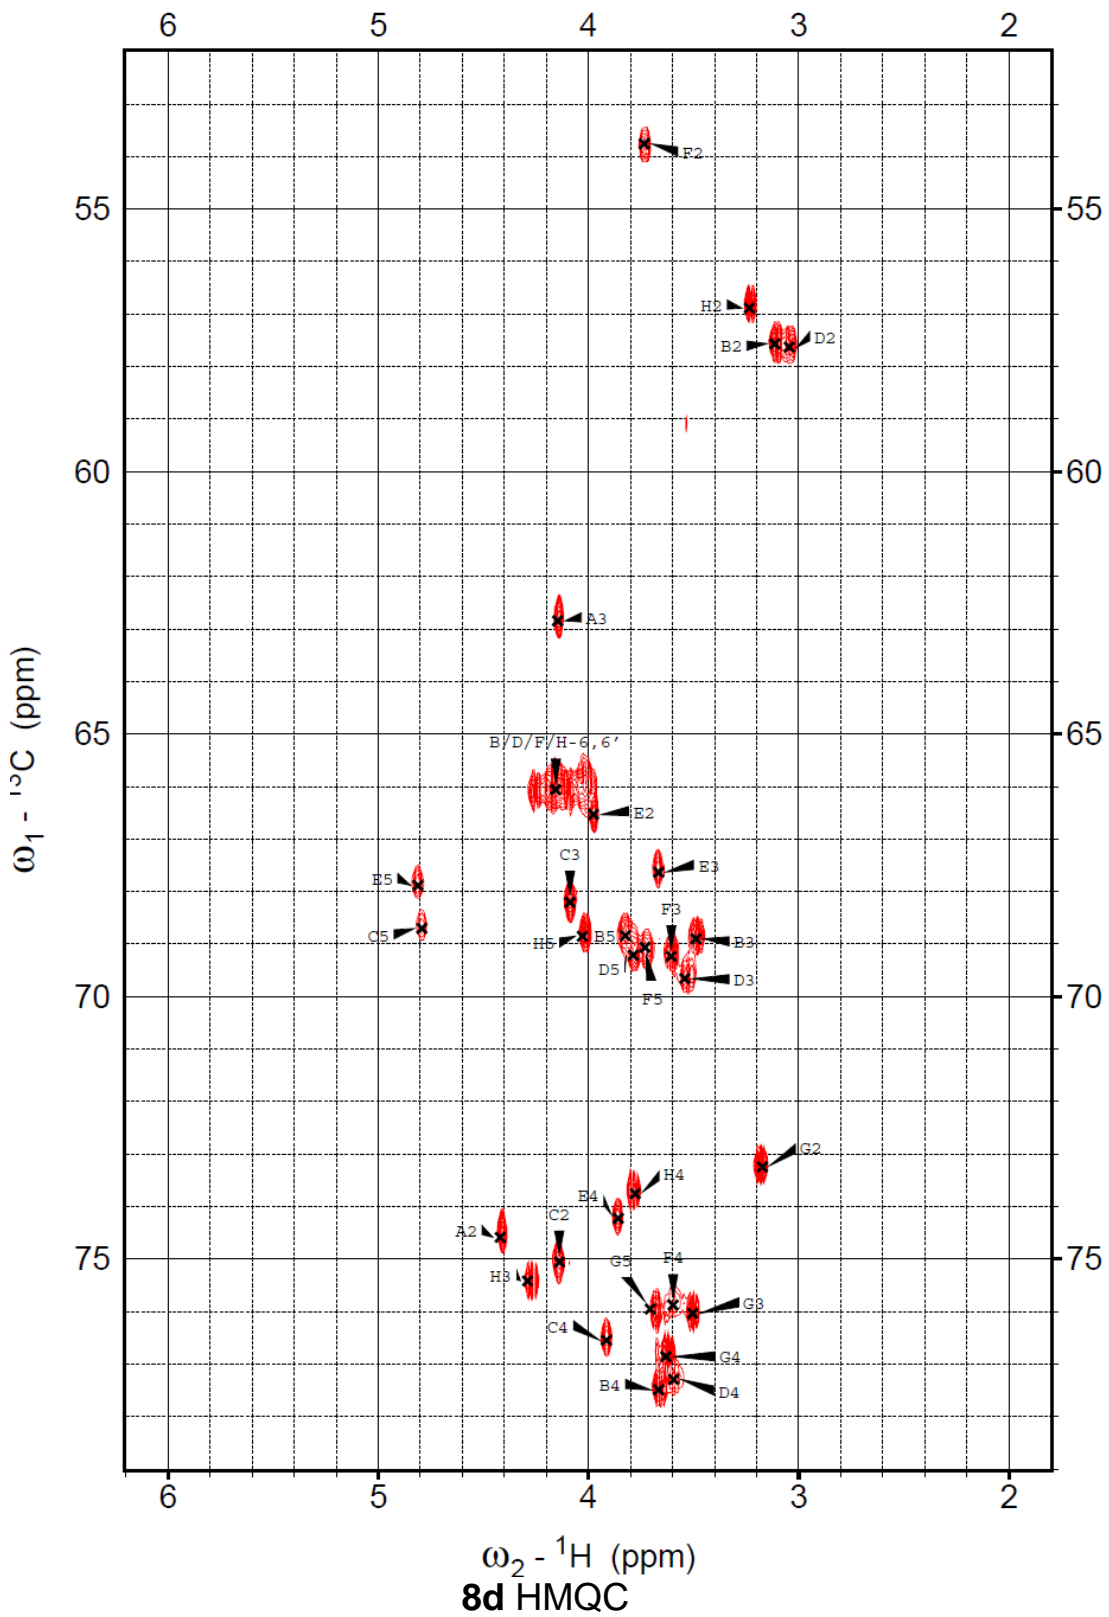



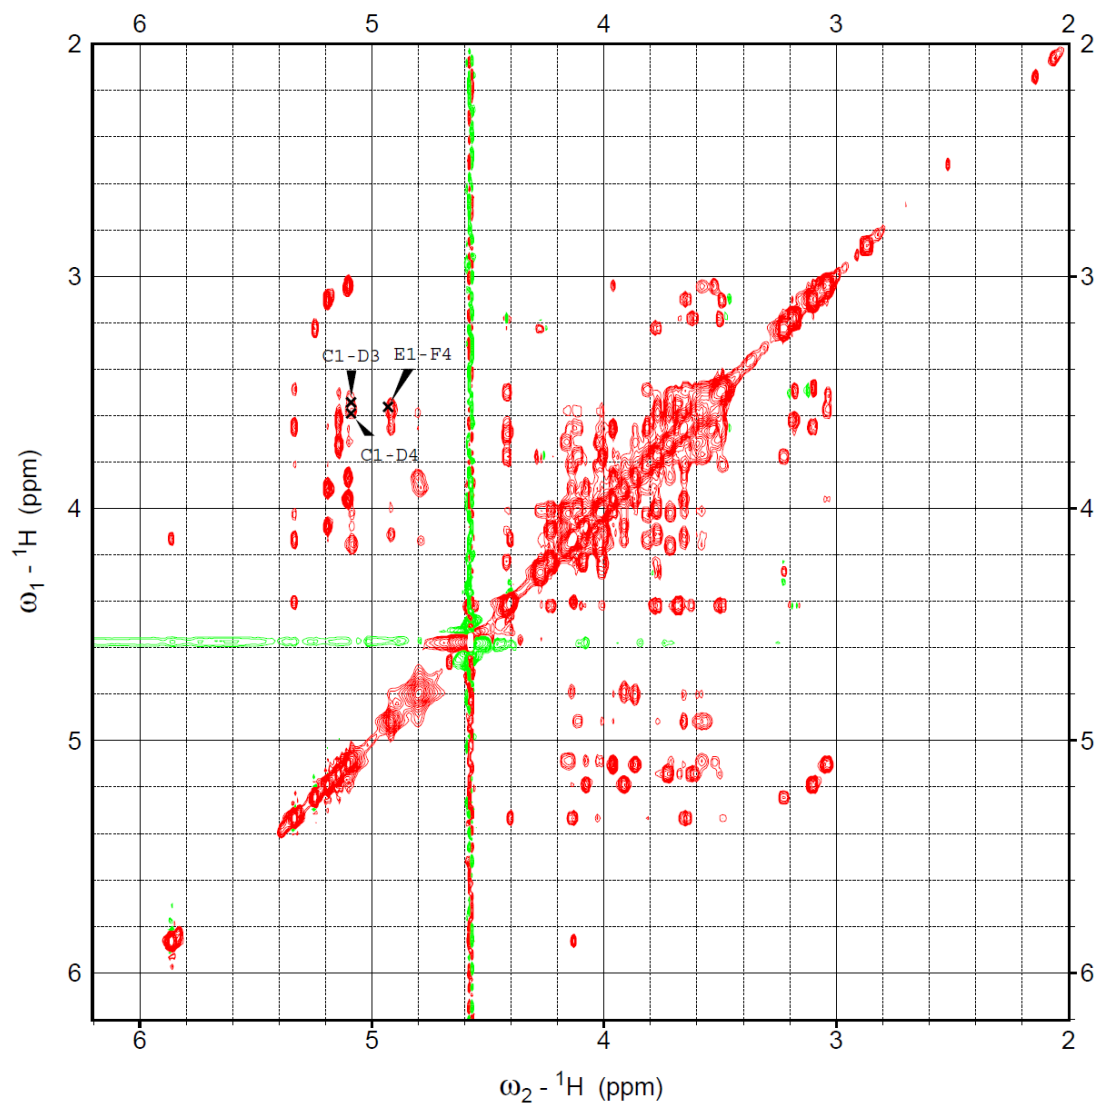

**8d NOESY**

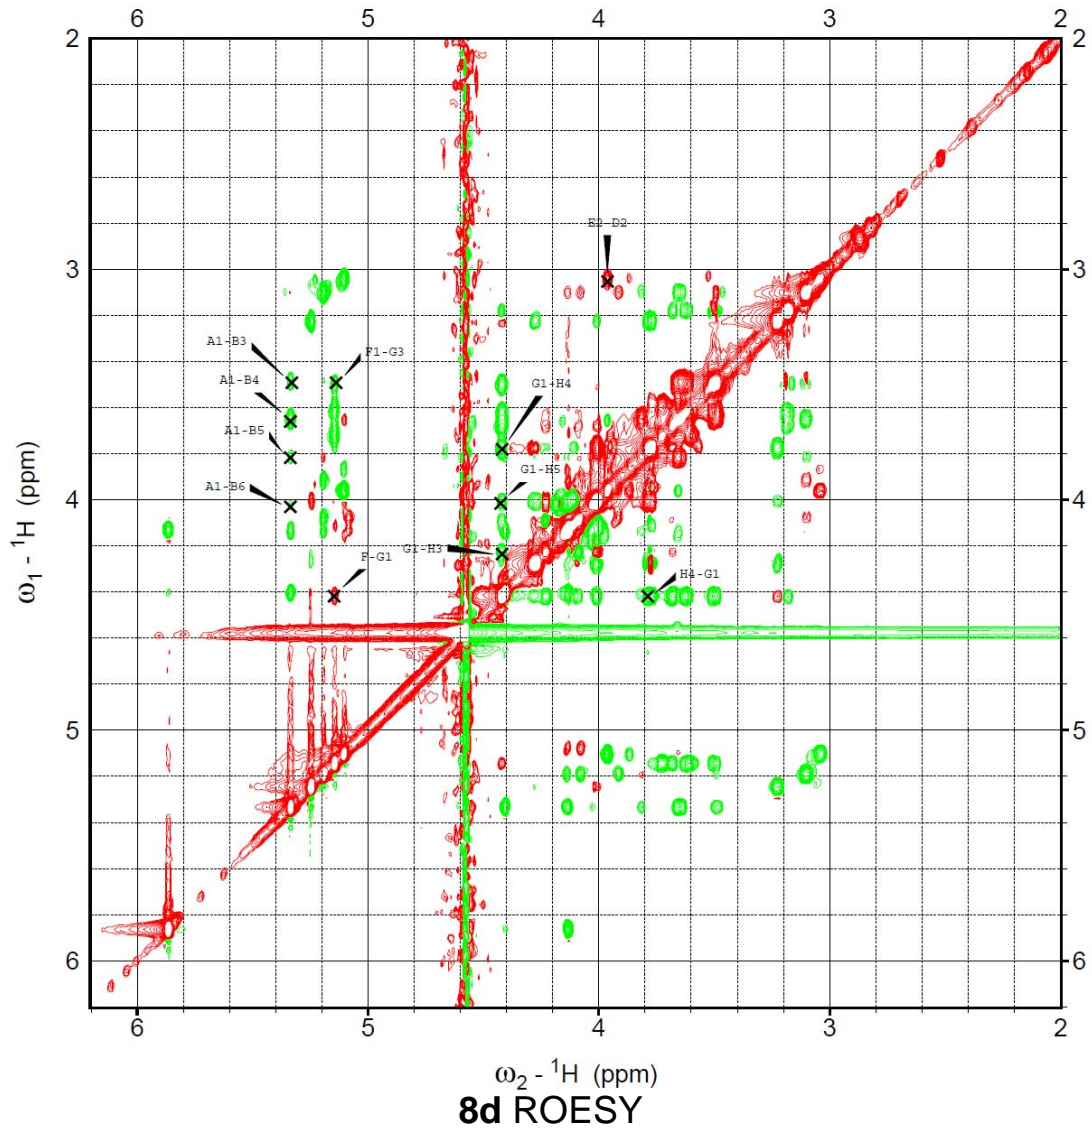

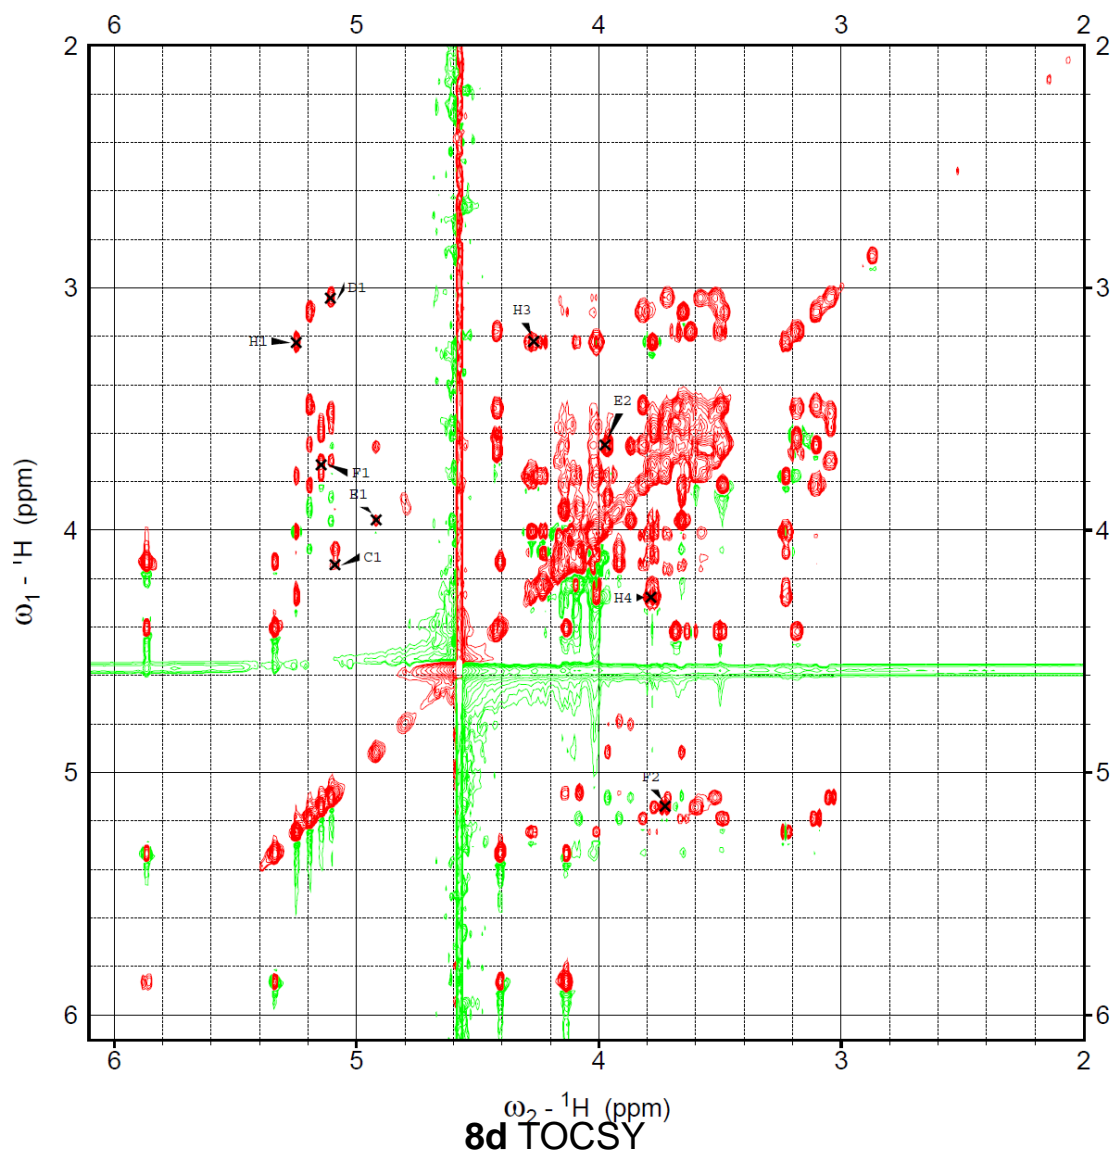

# 10a

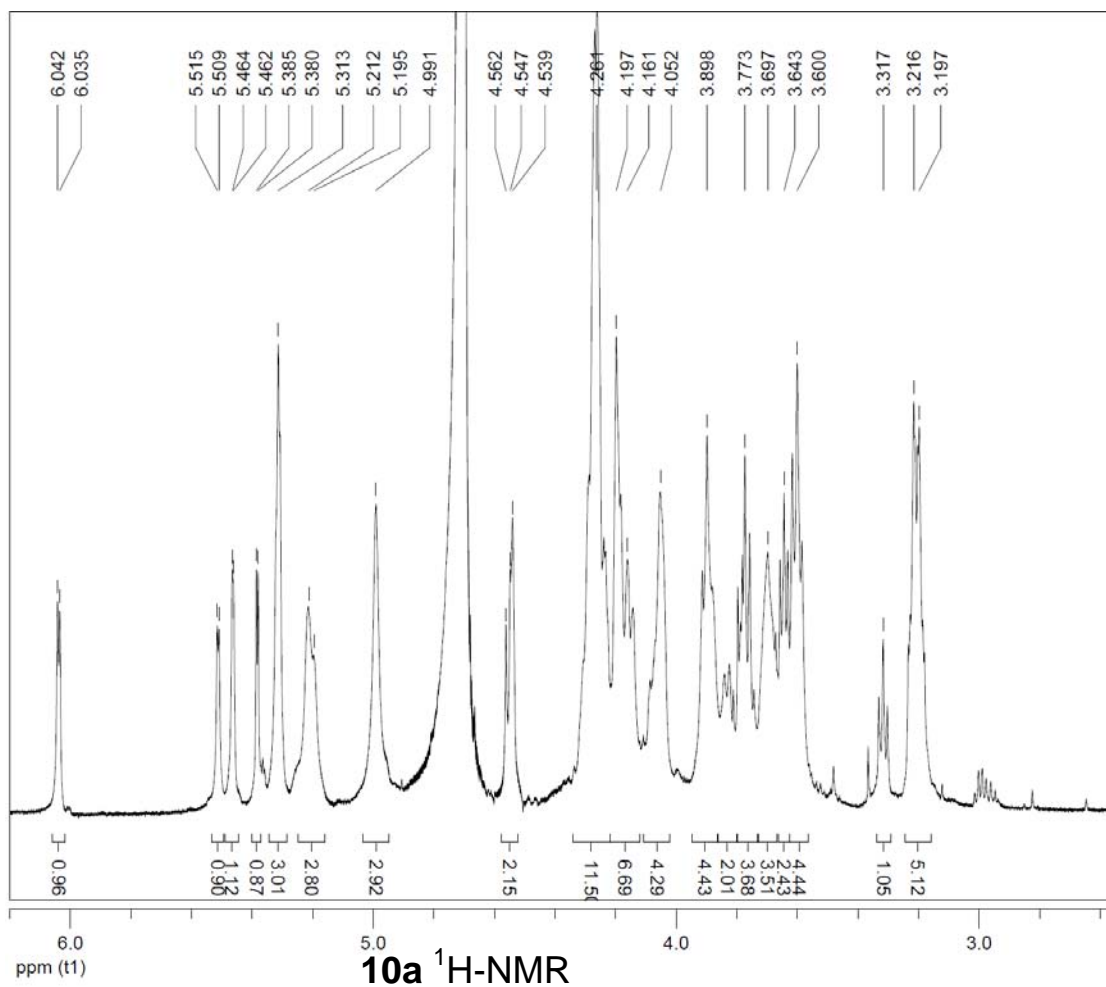

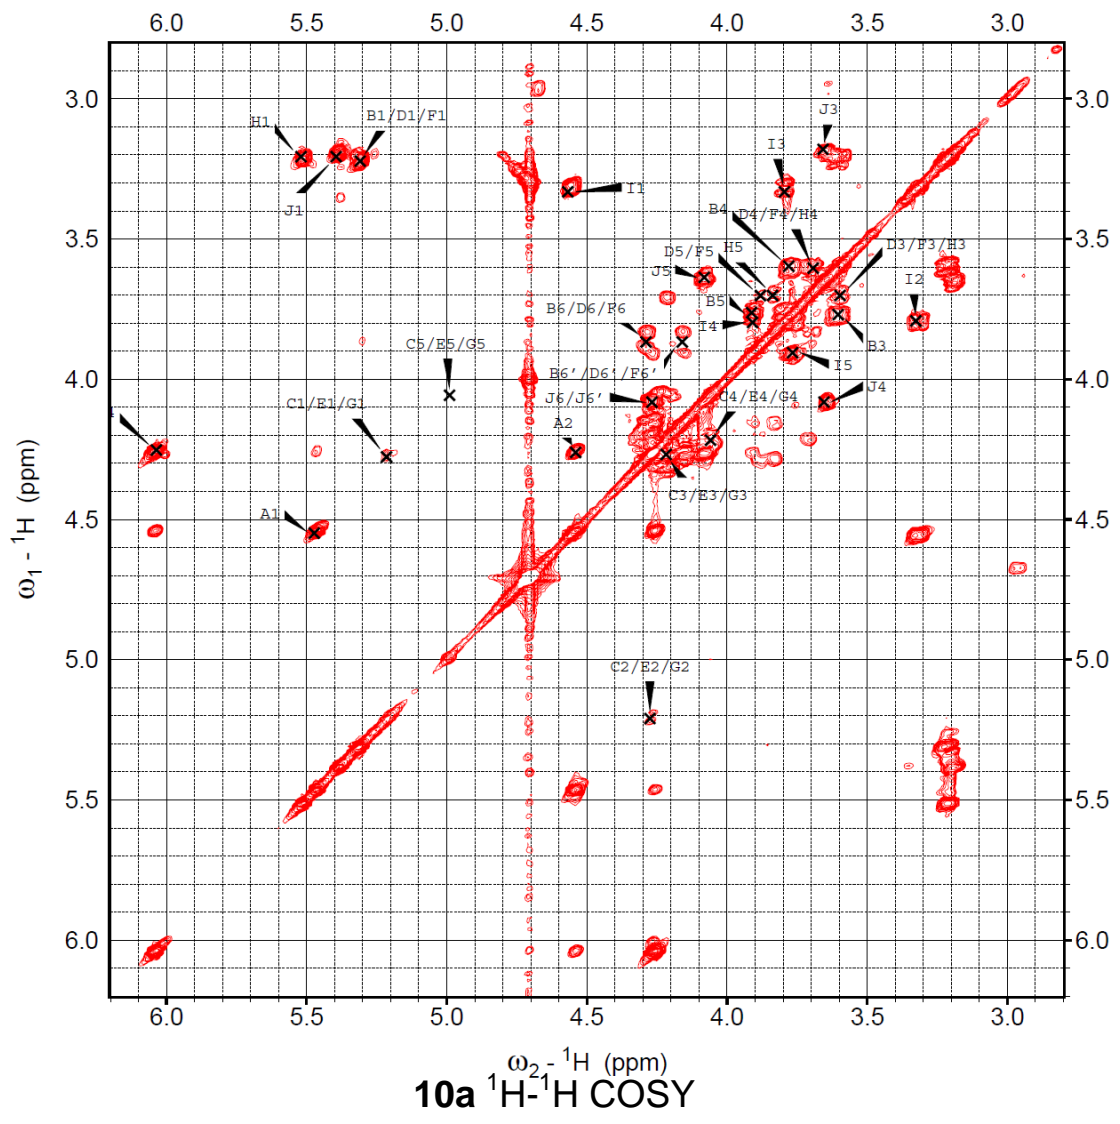

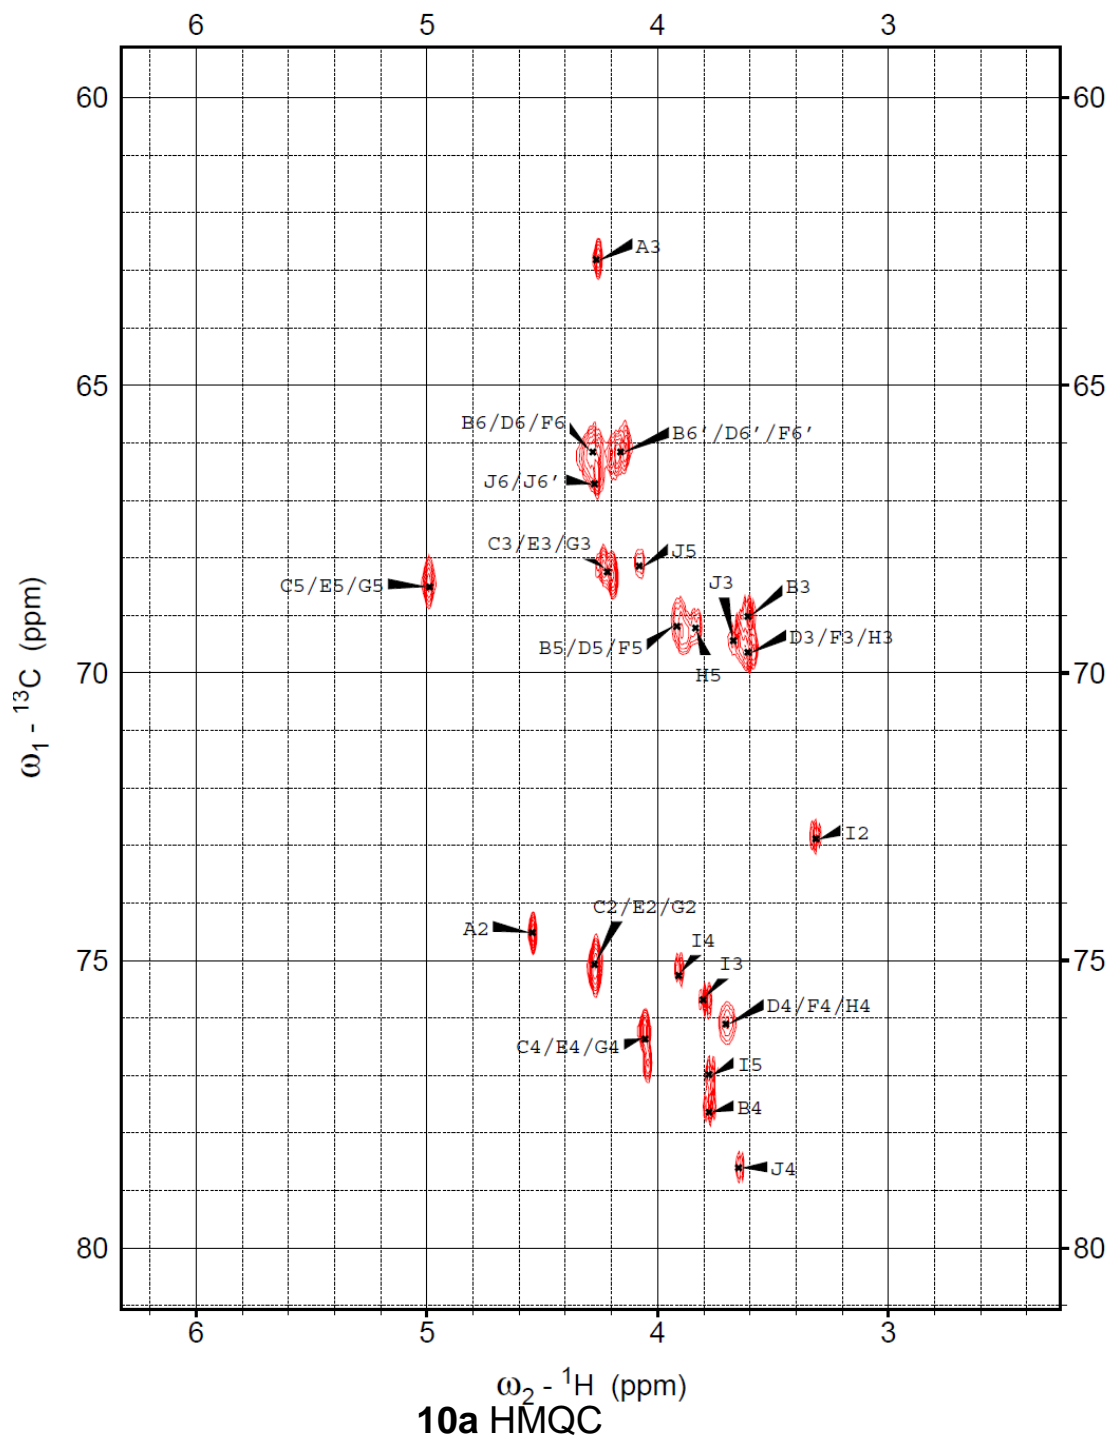

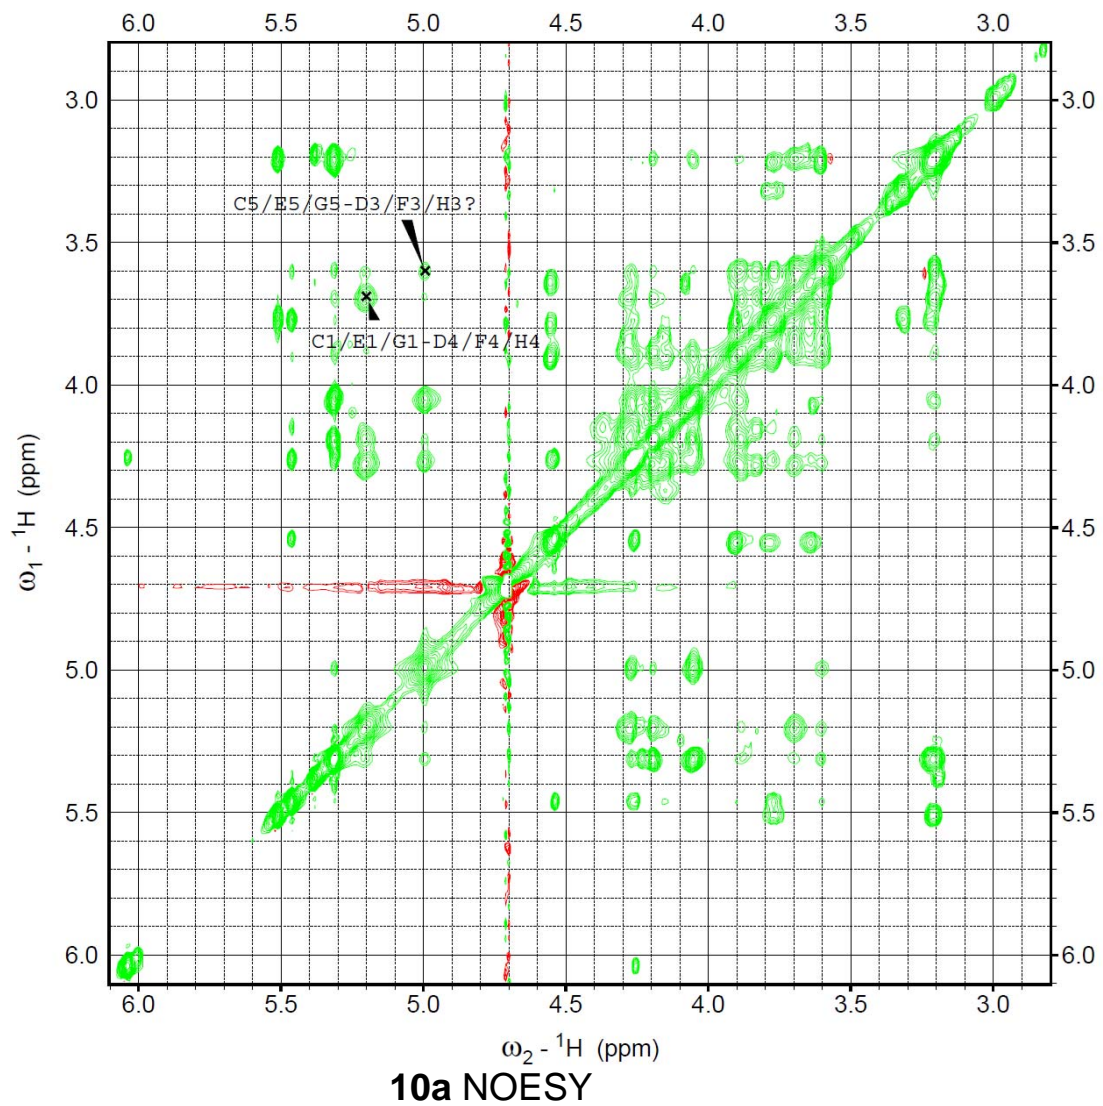

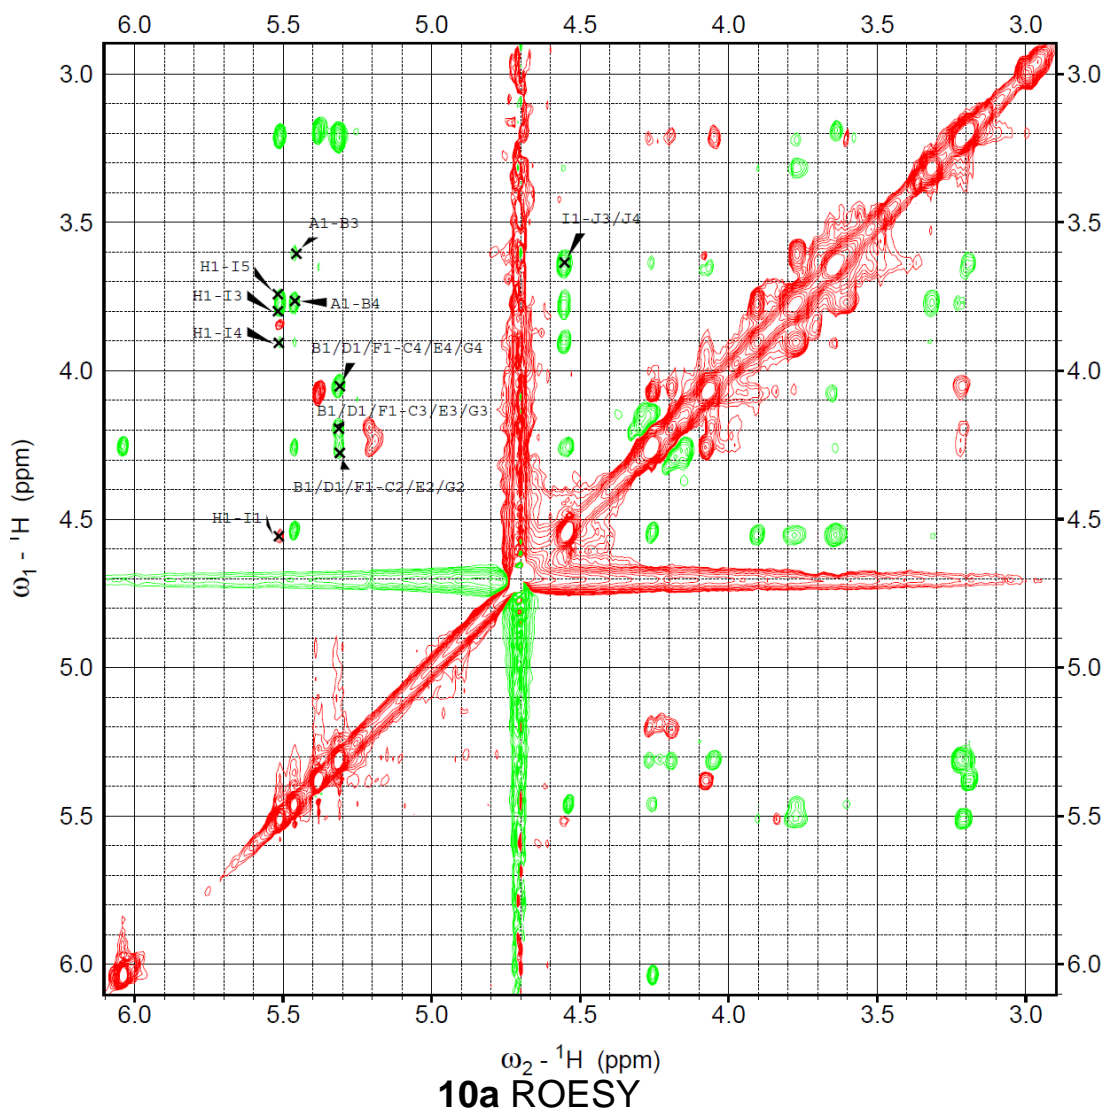



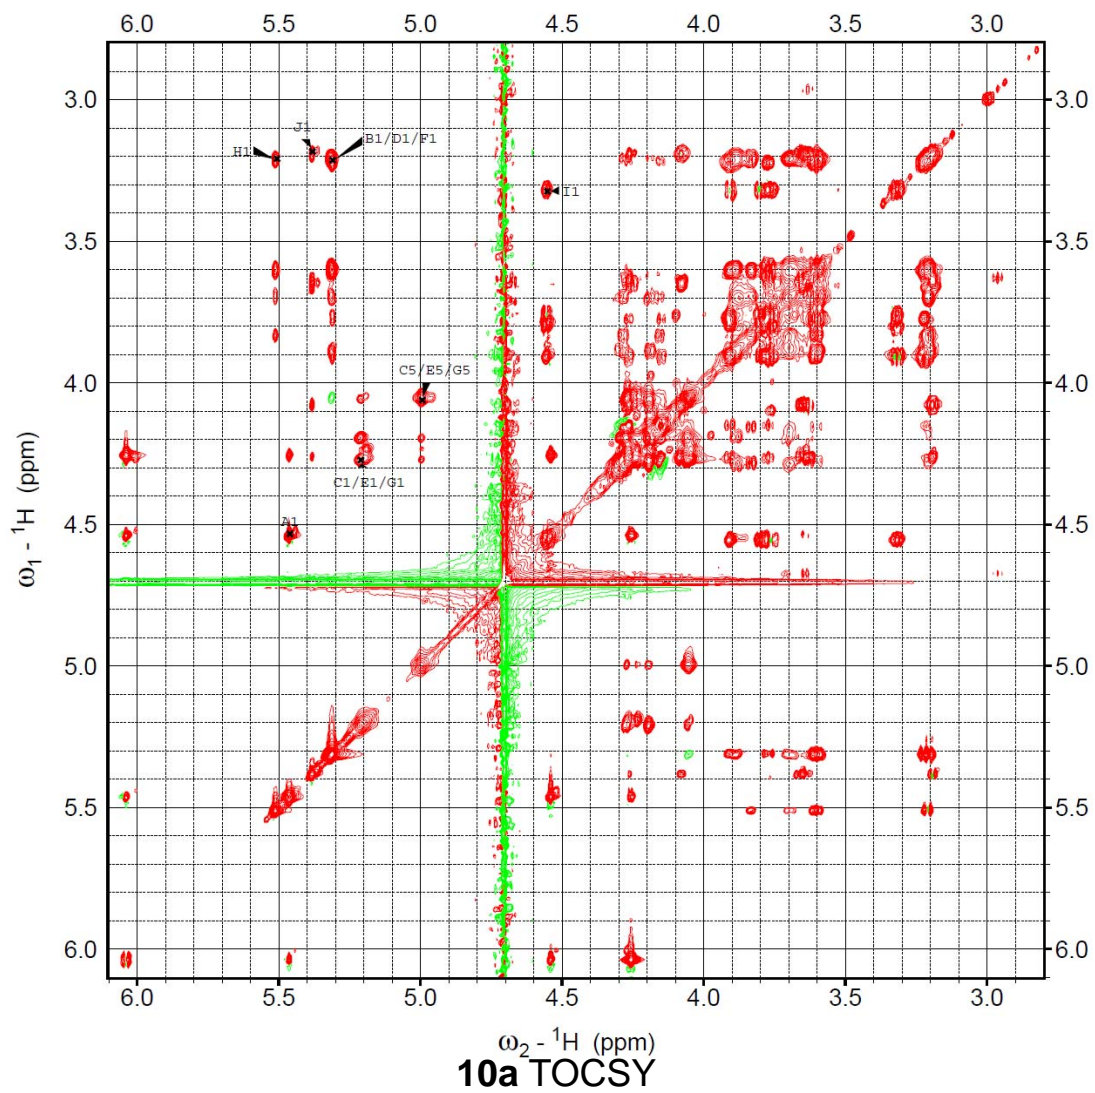

# 10b

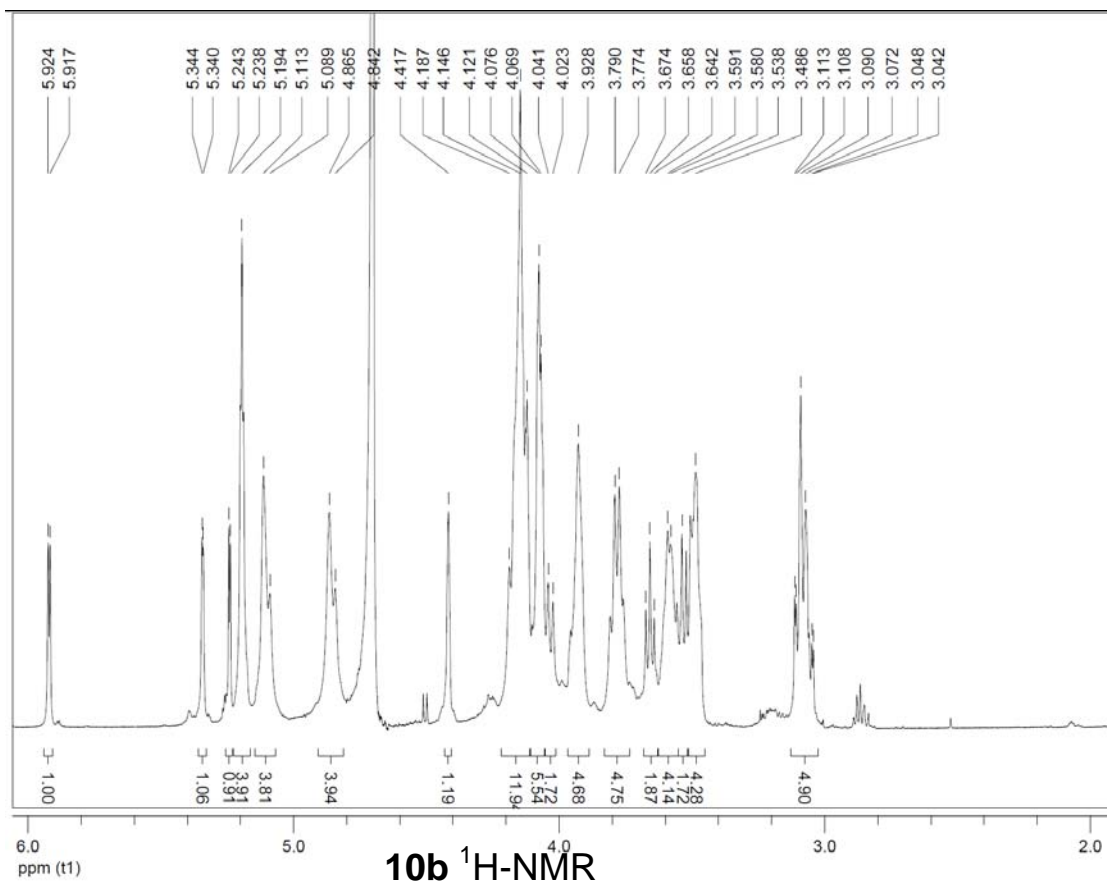



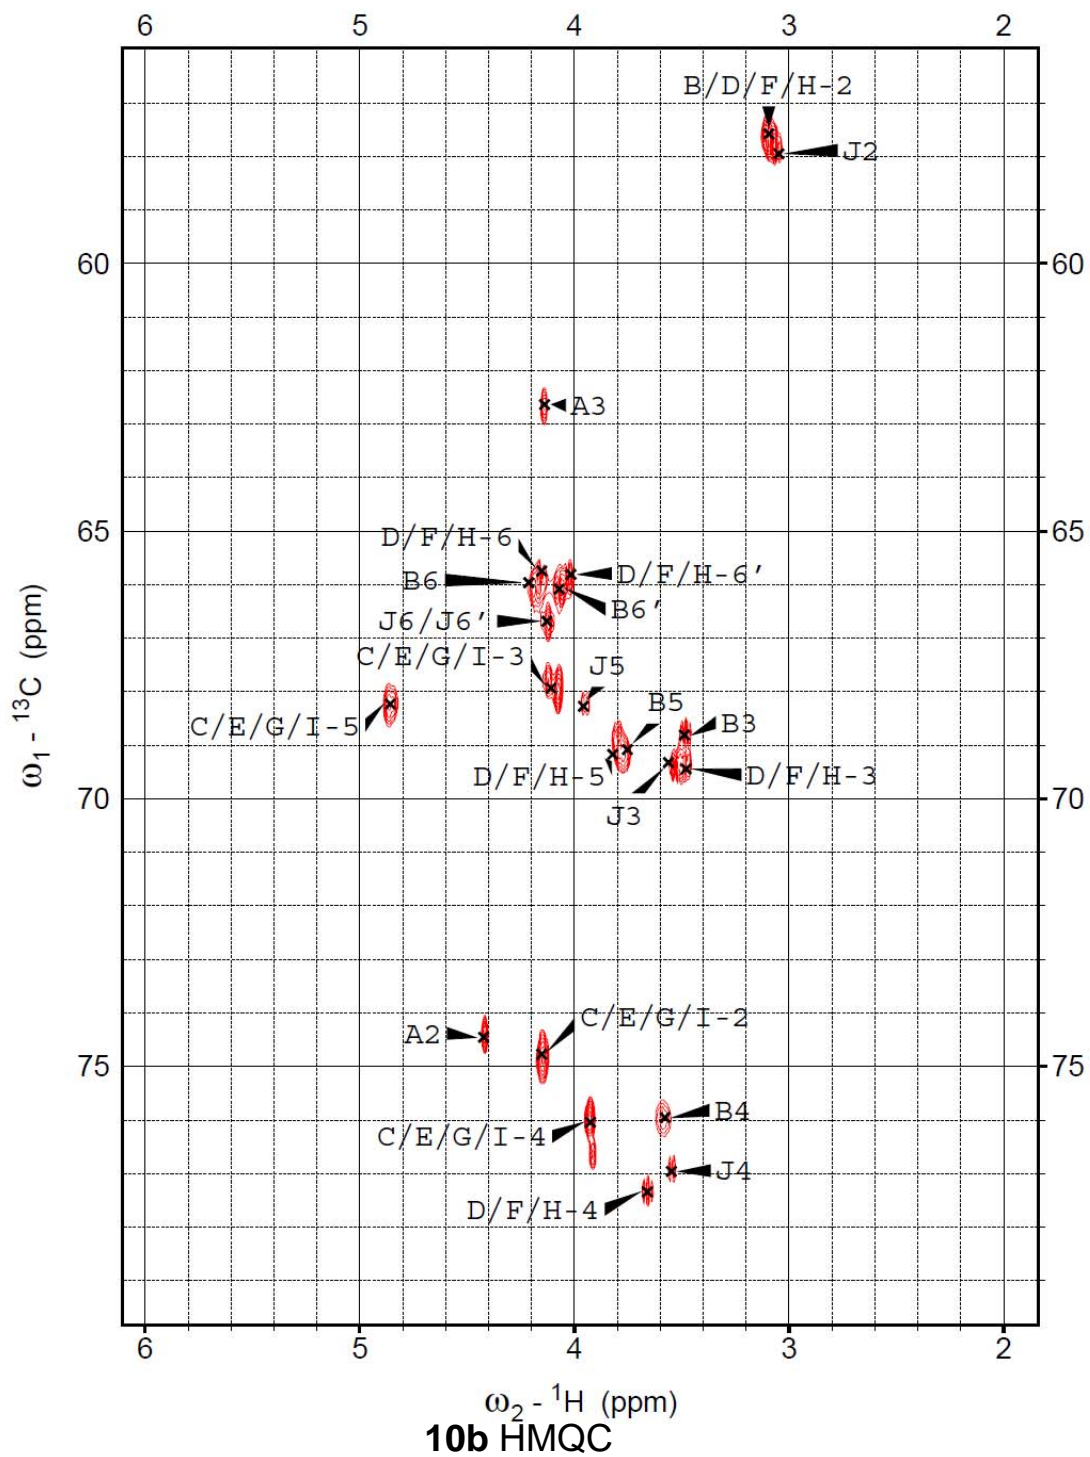

10c

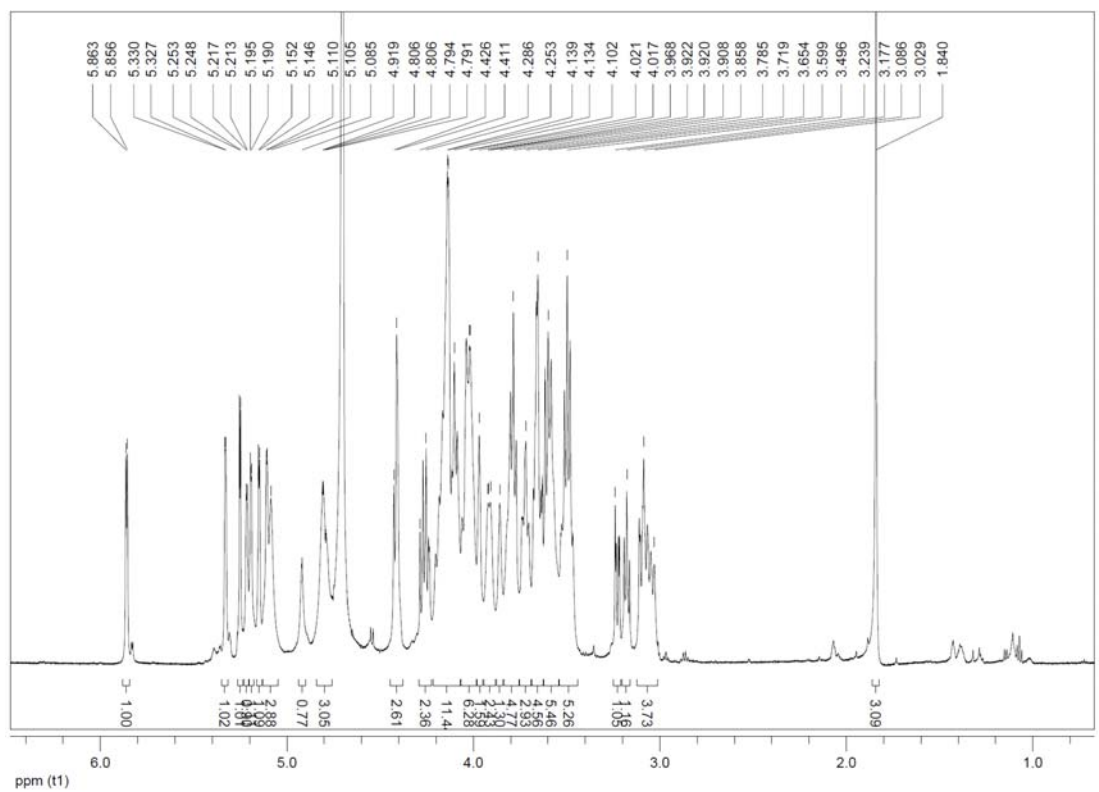

10c <sup>1</sup>H-NMR

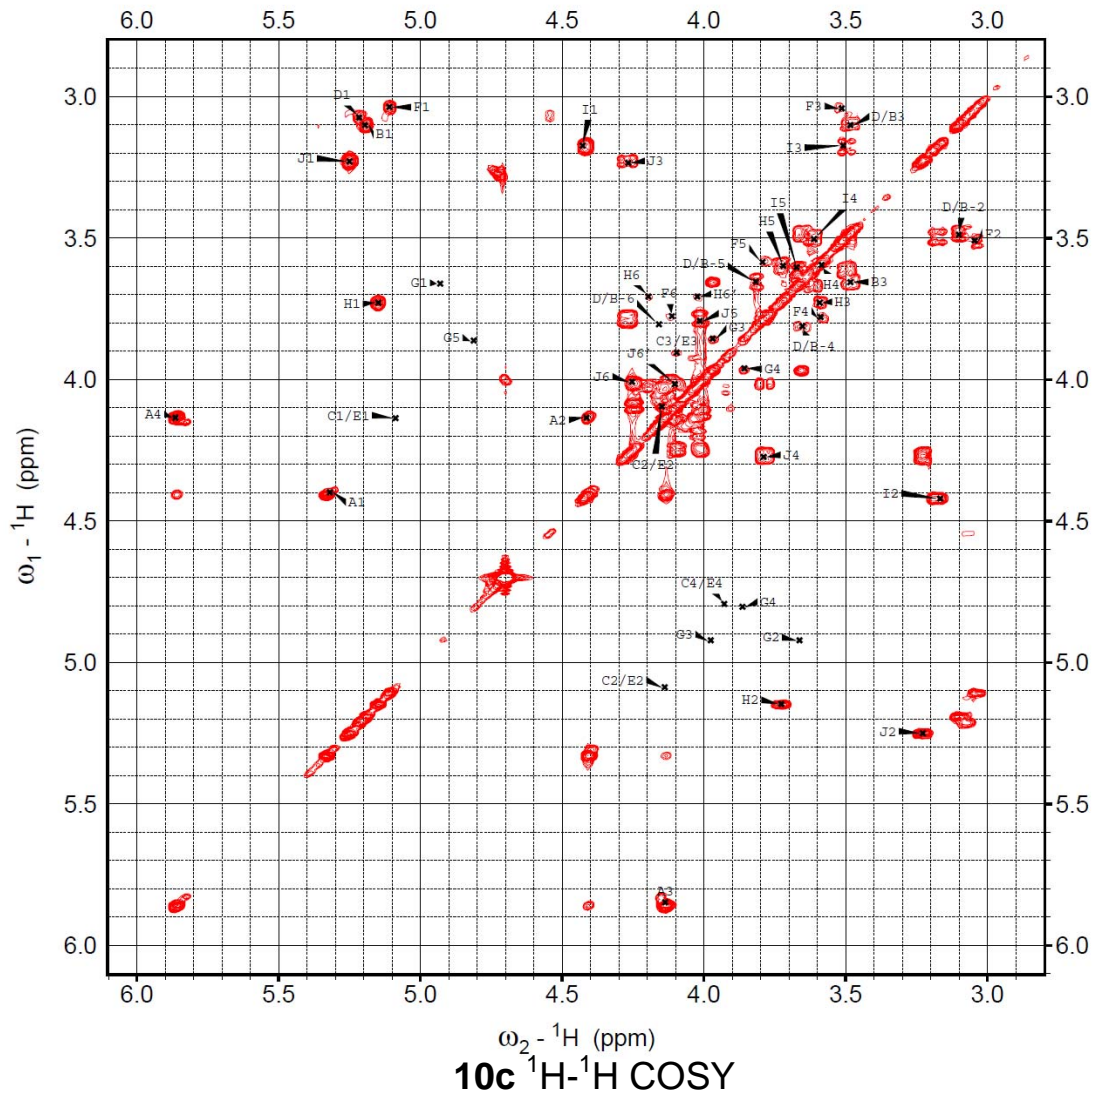

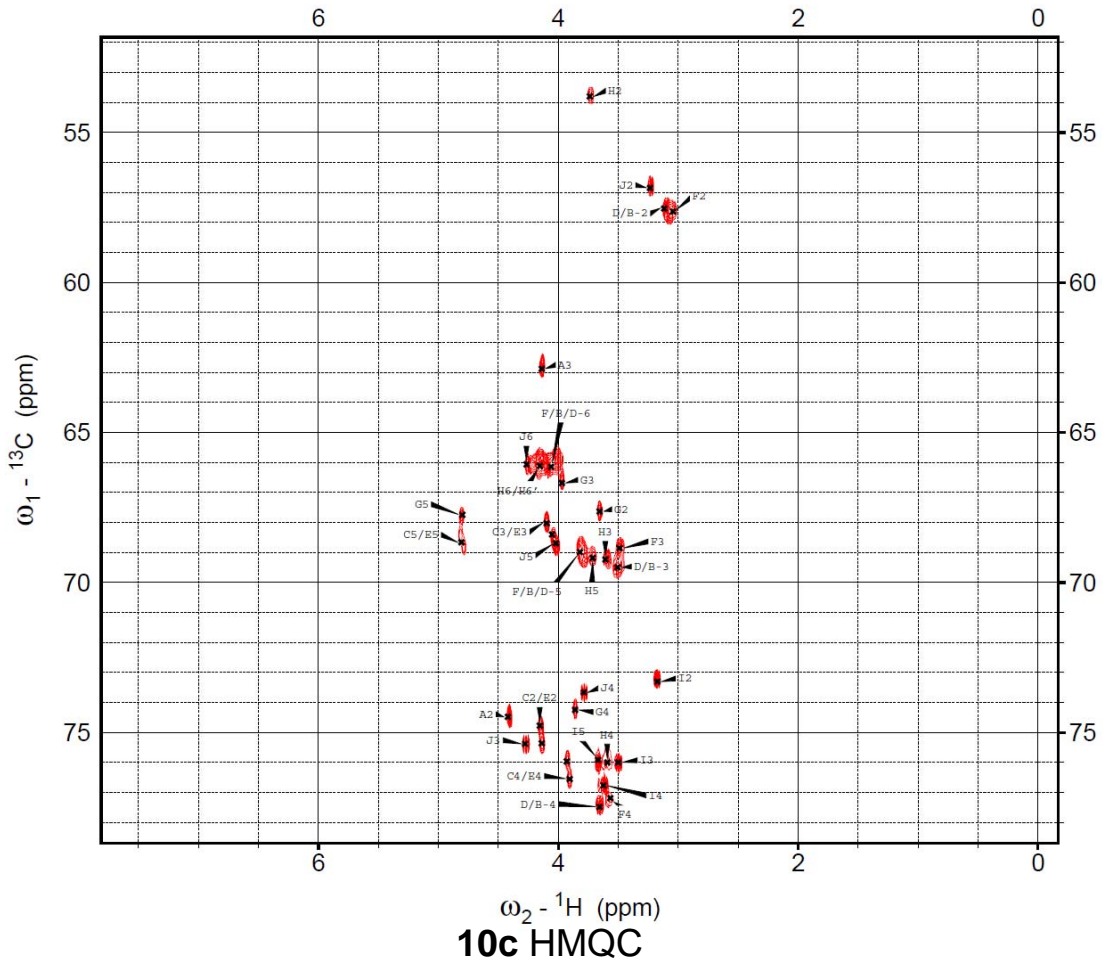

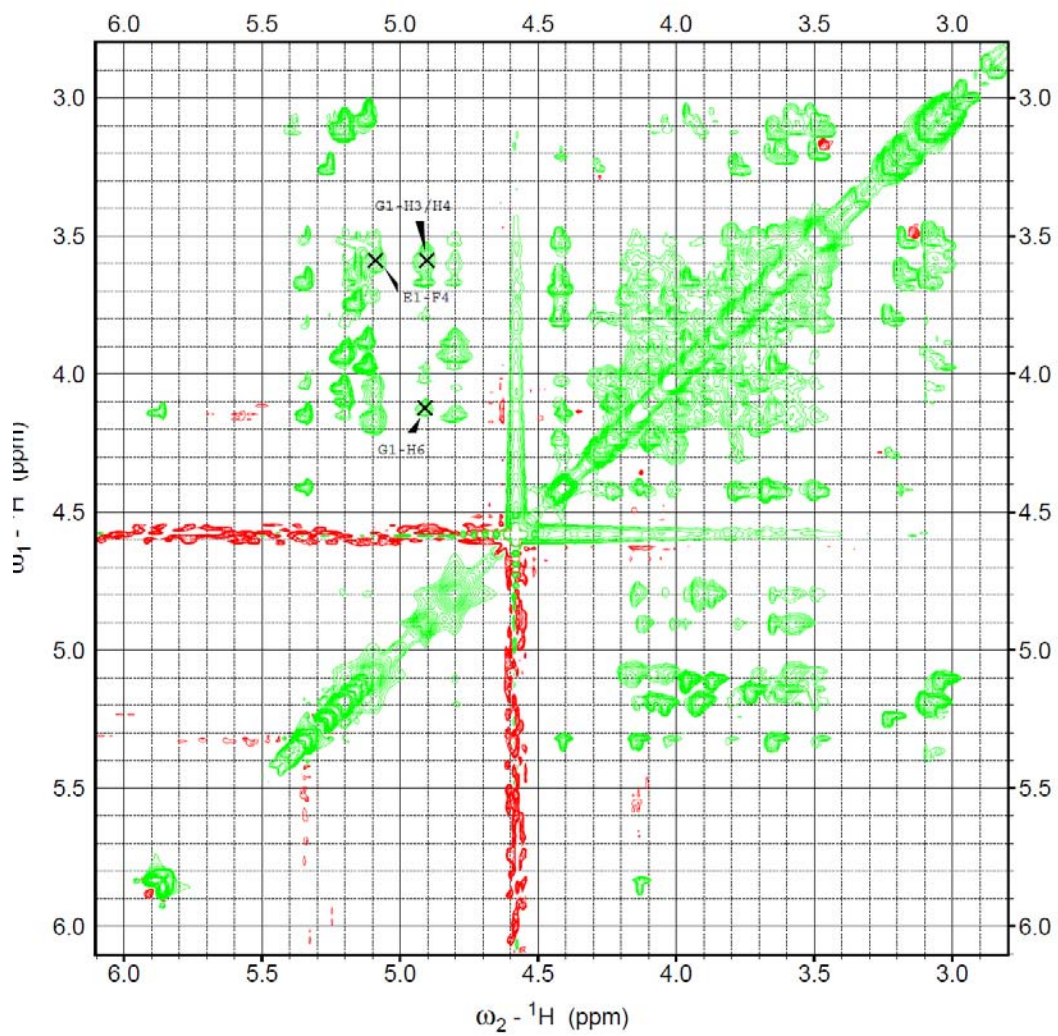

**10c NOESY**



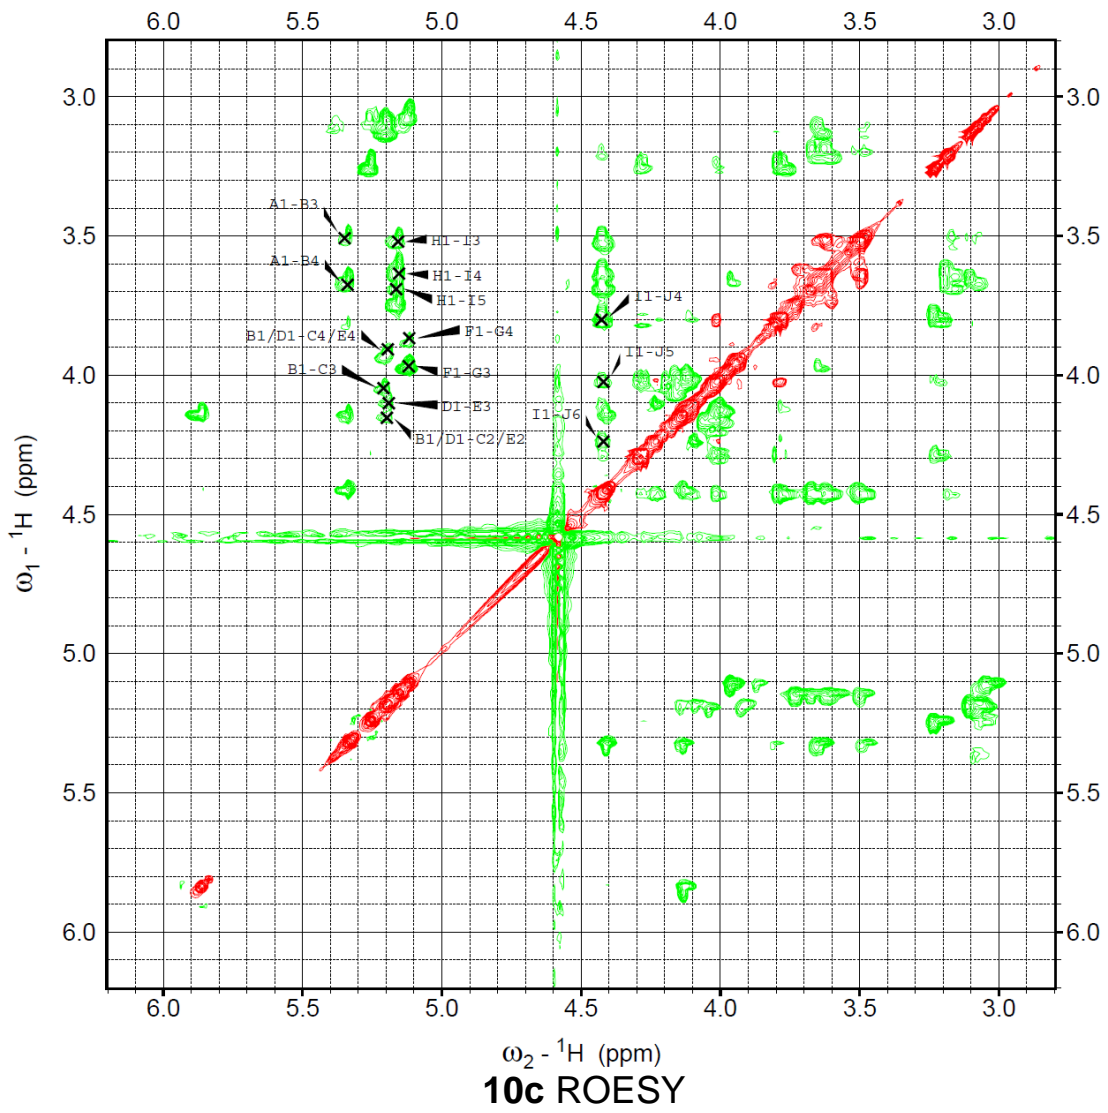

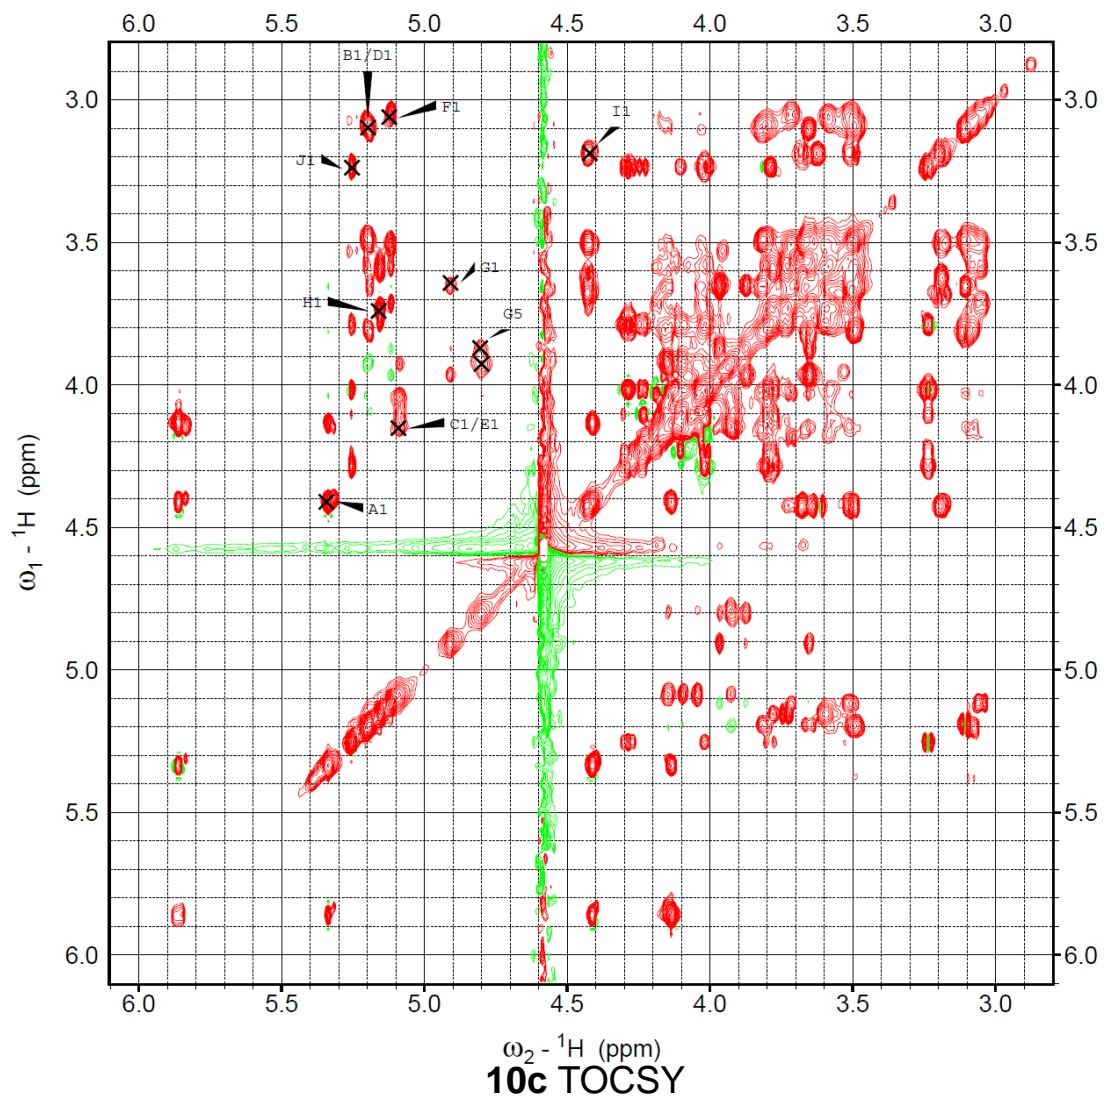

12a

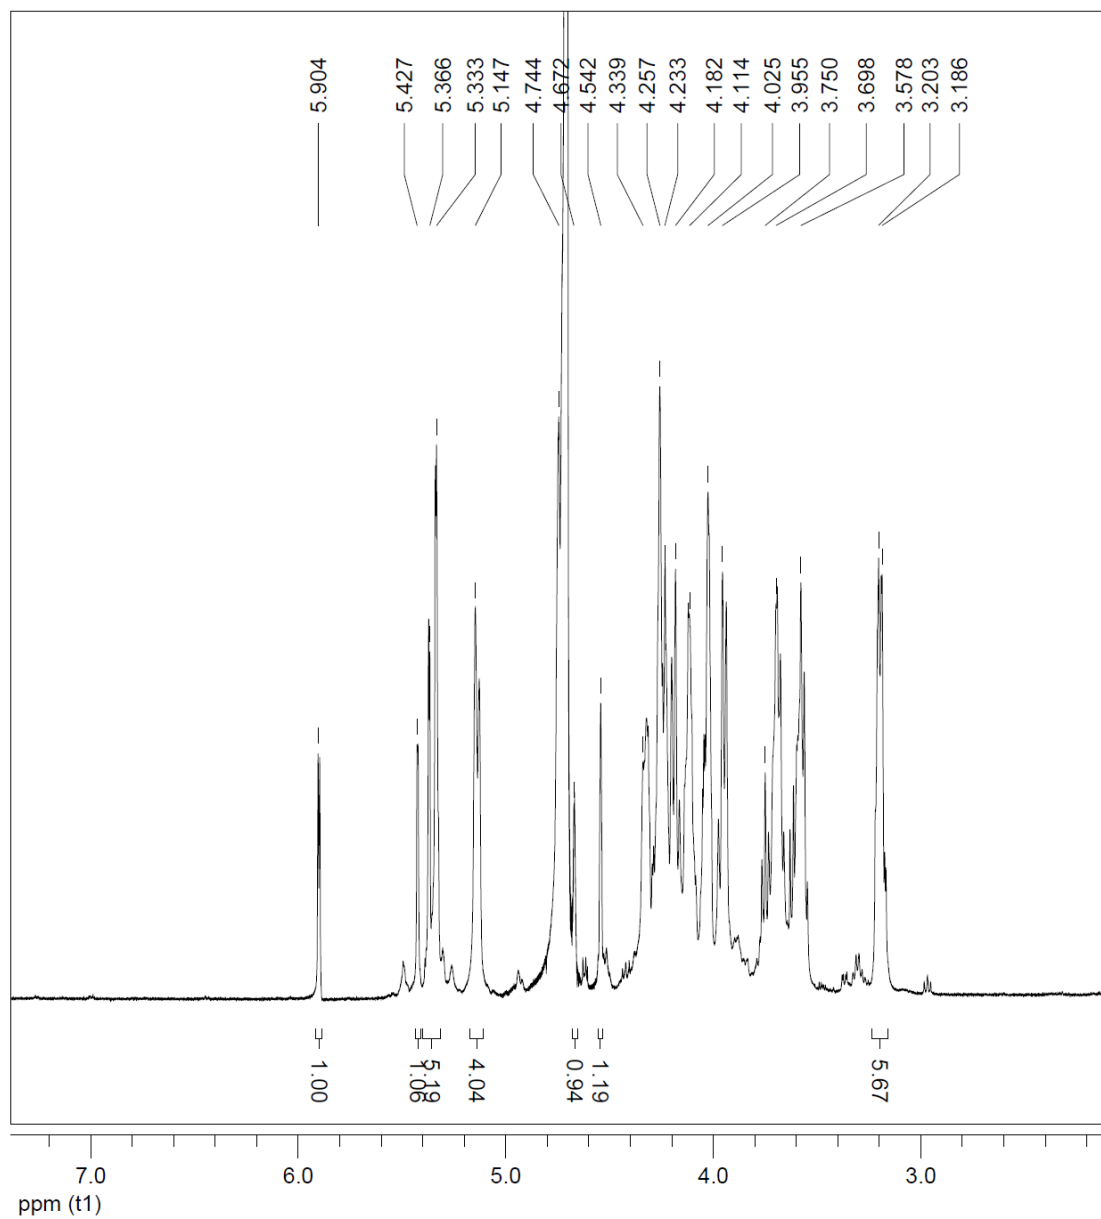

12a <sup>1</sup>H-NMR

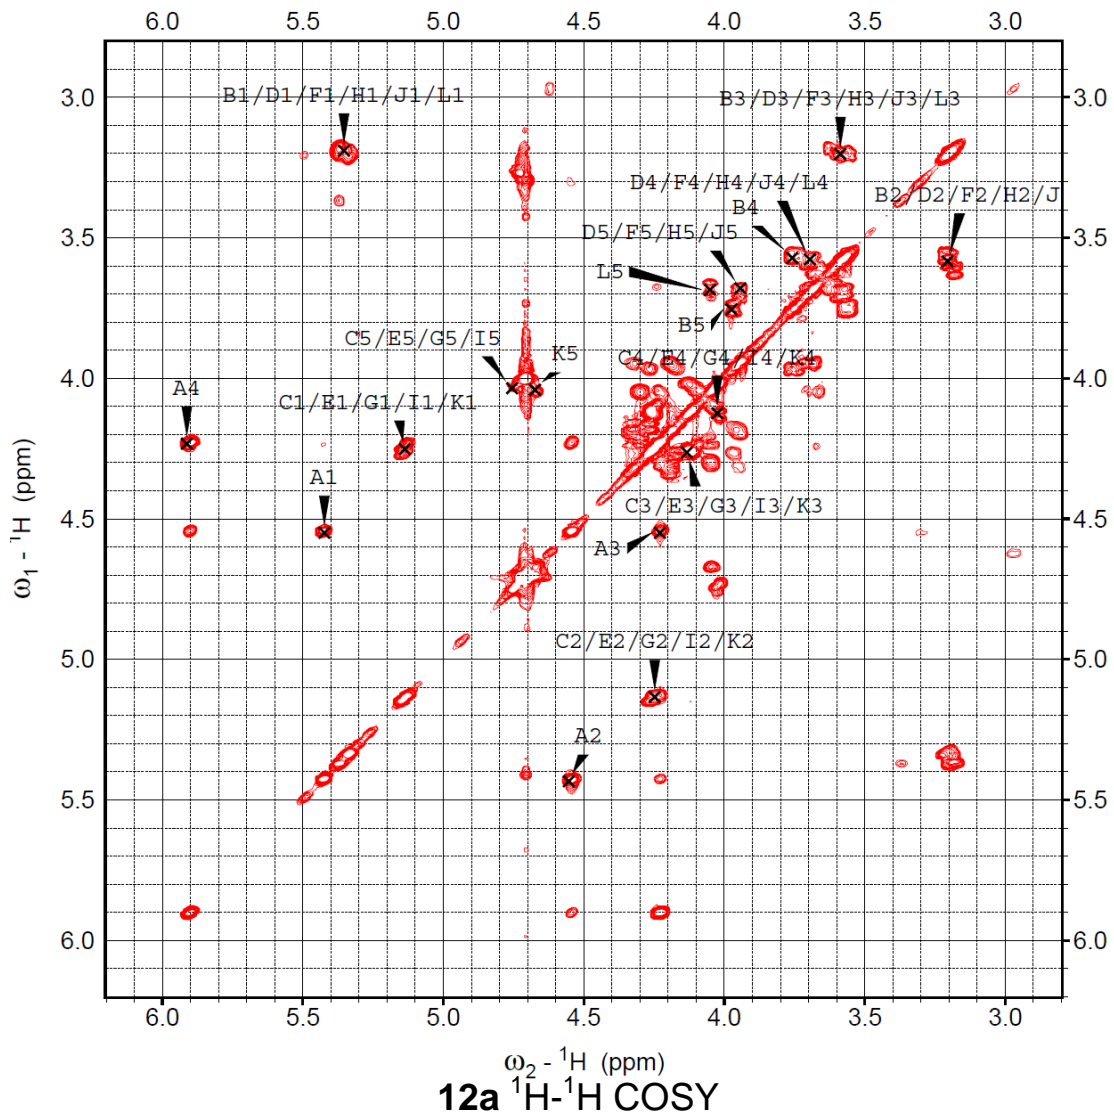

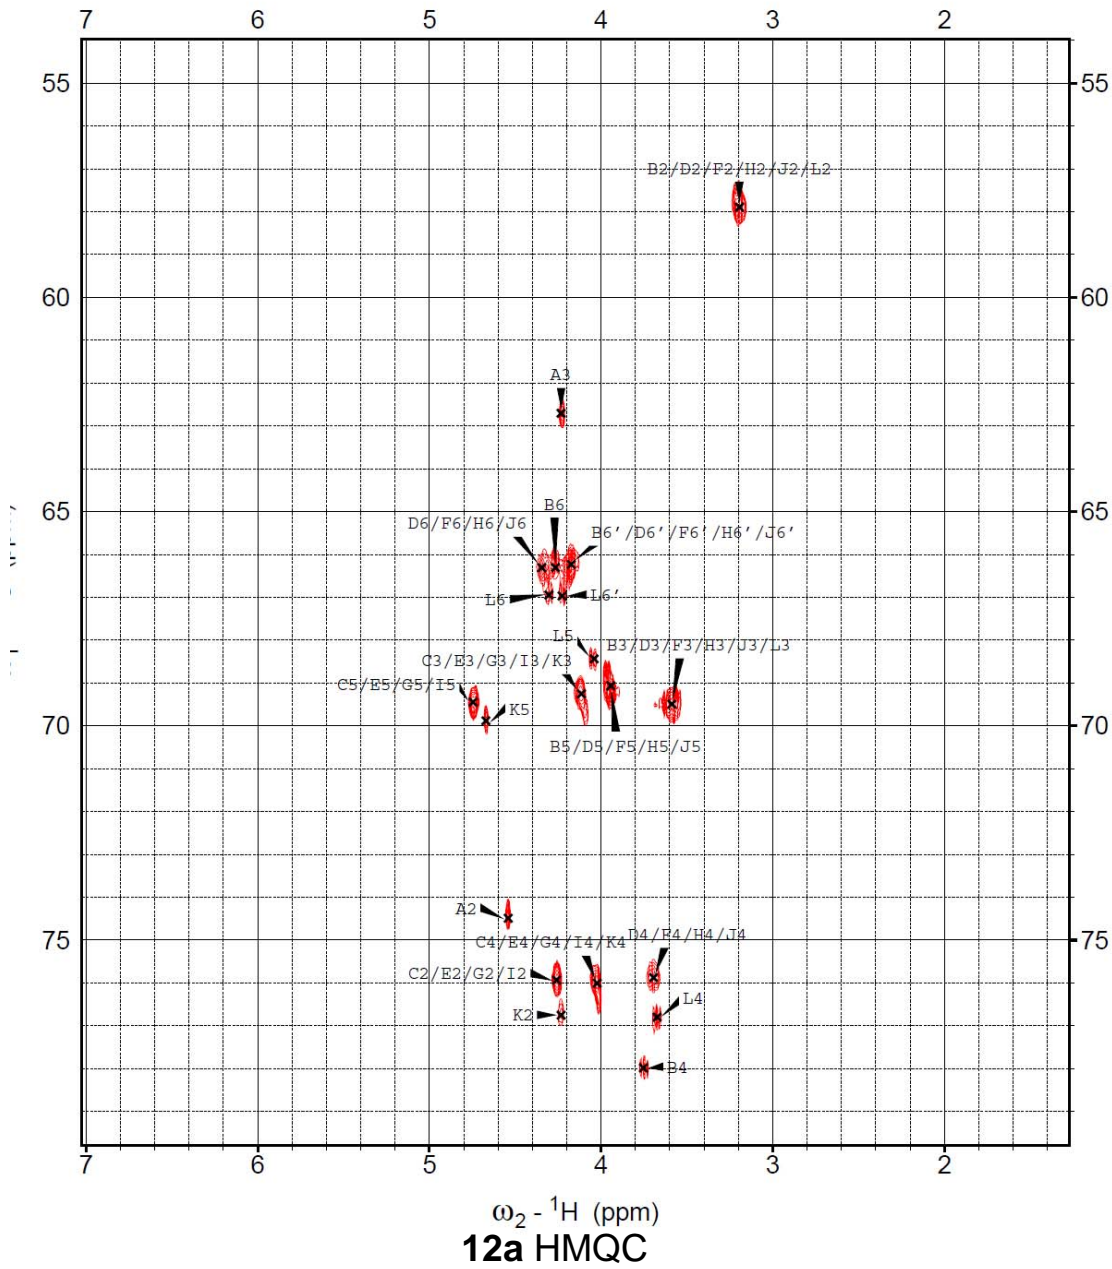

12b

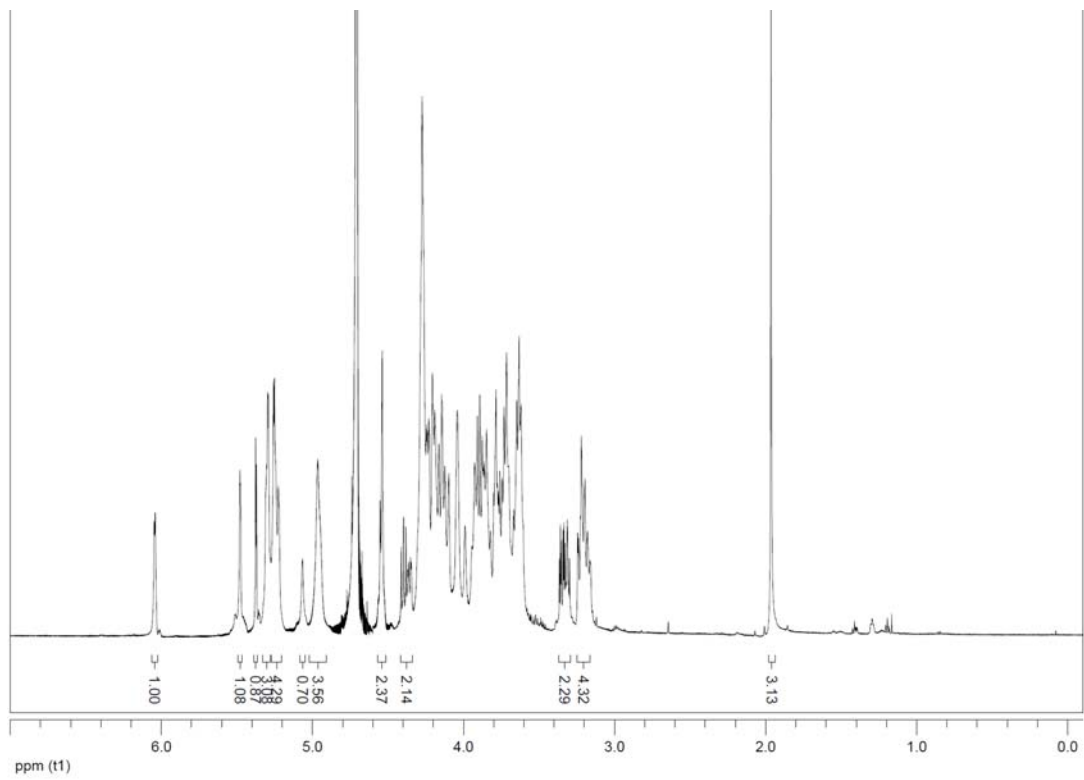

12b  $^1\text{H-NMR}$

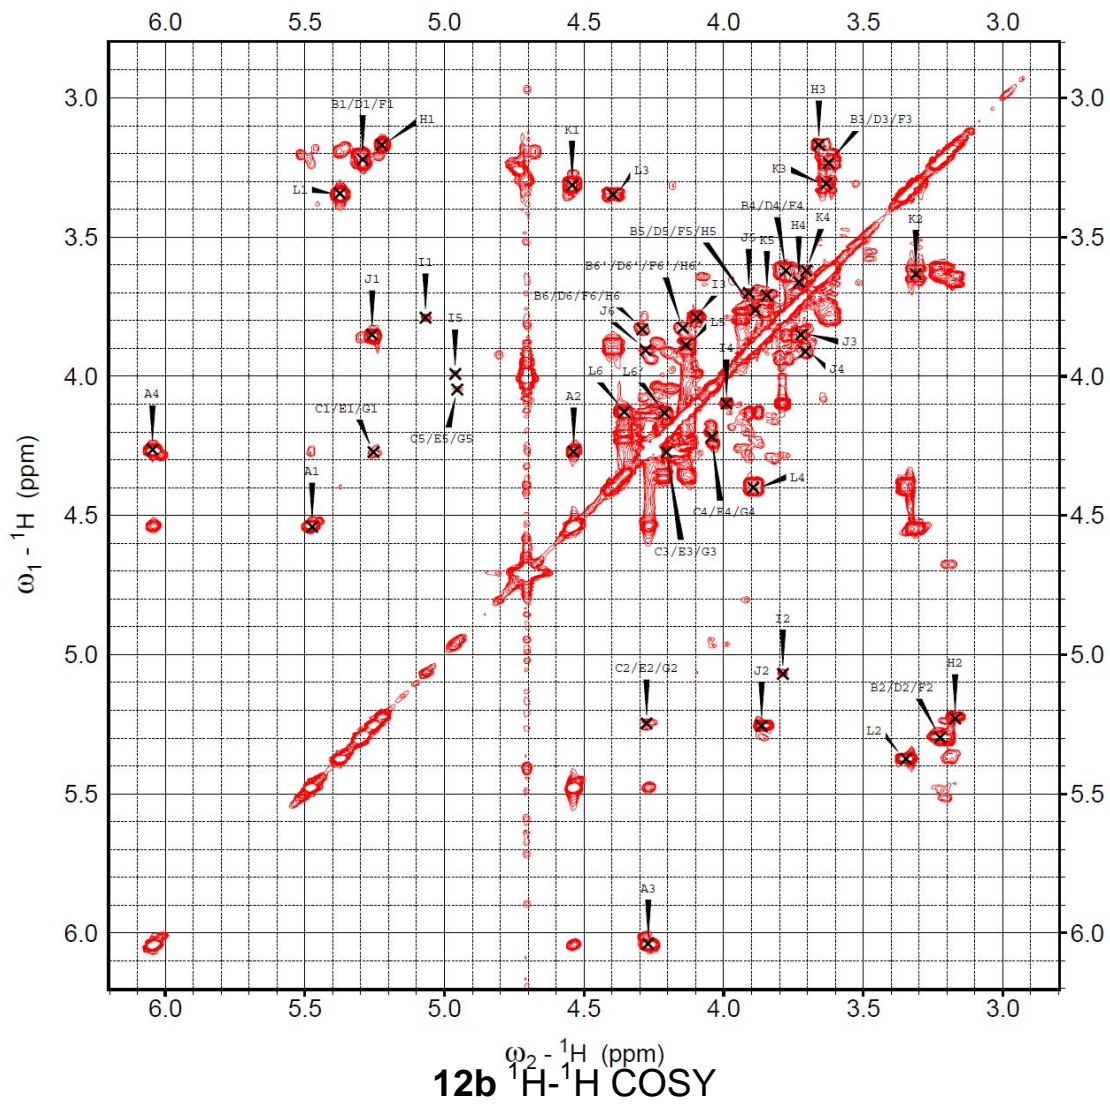

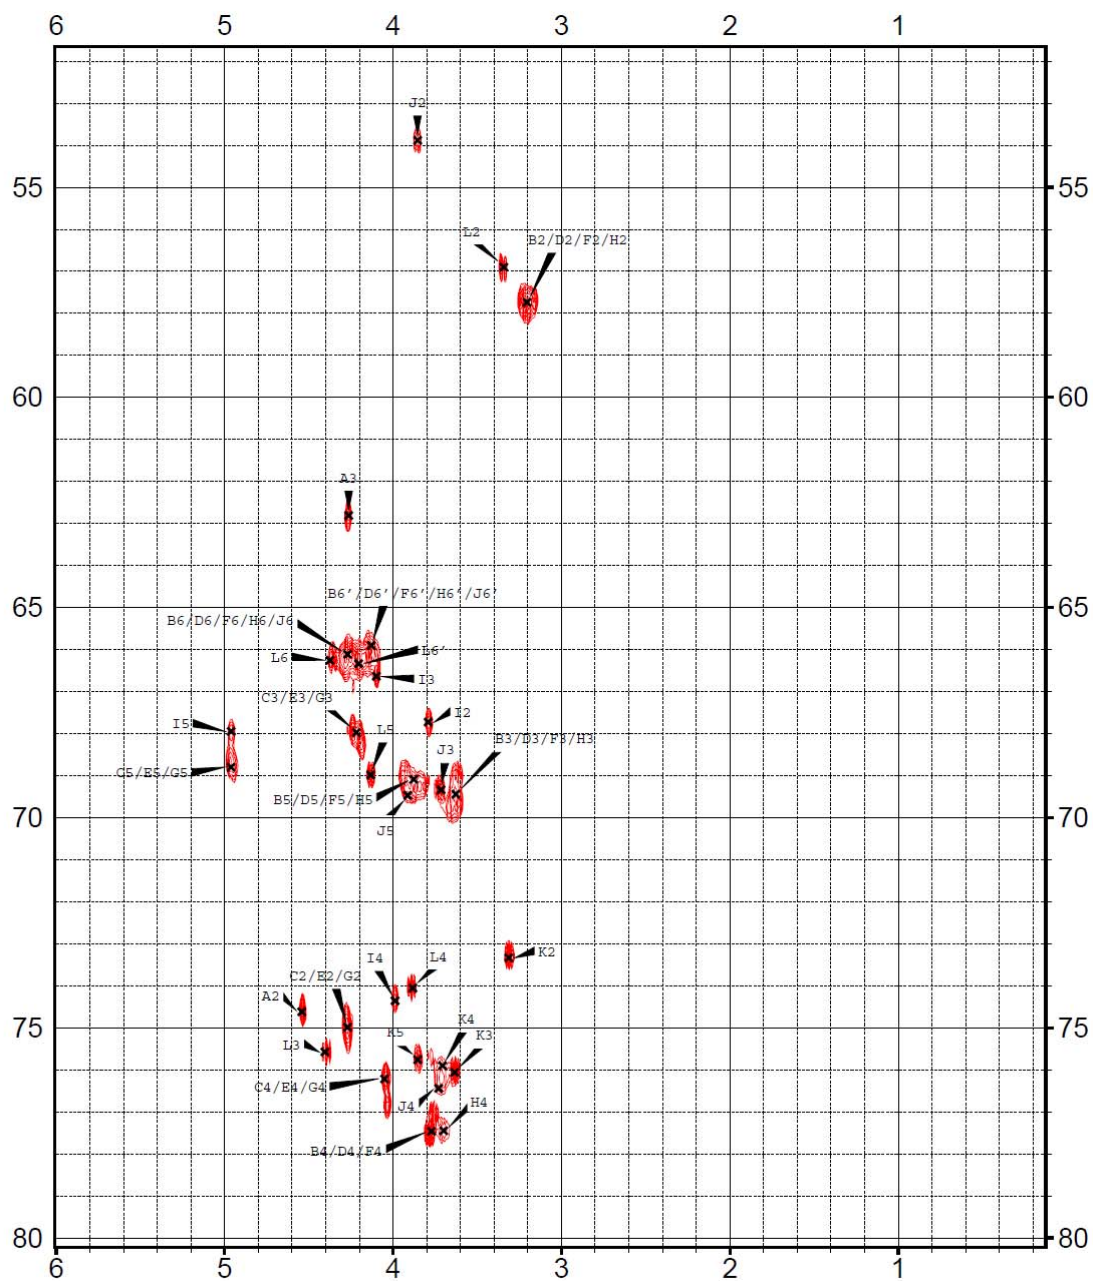



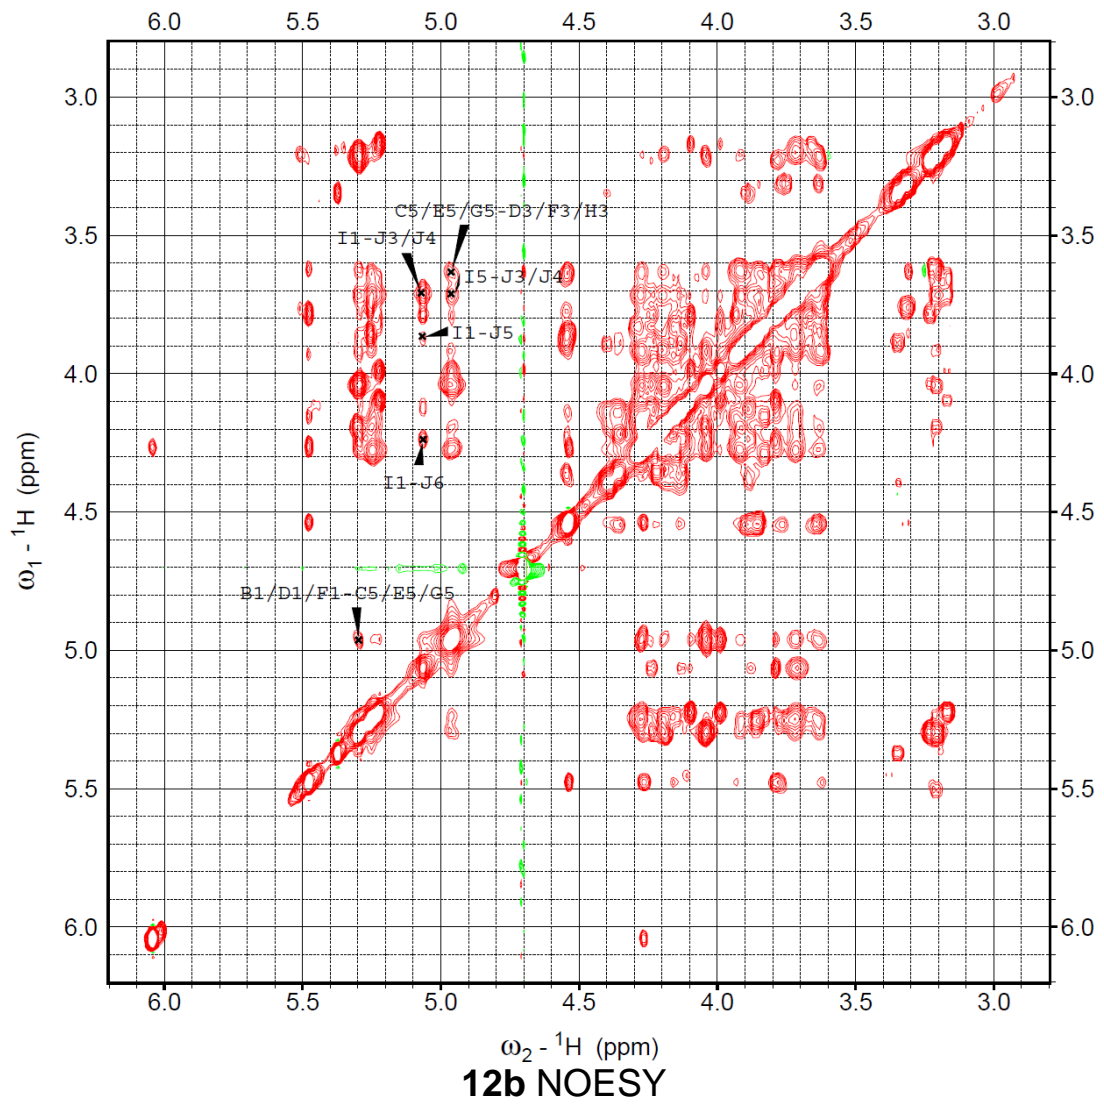

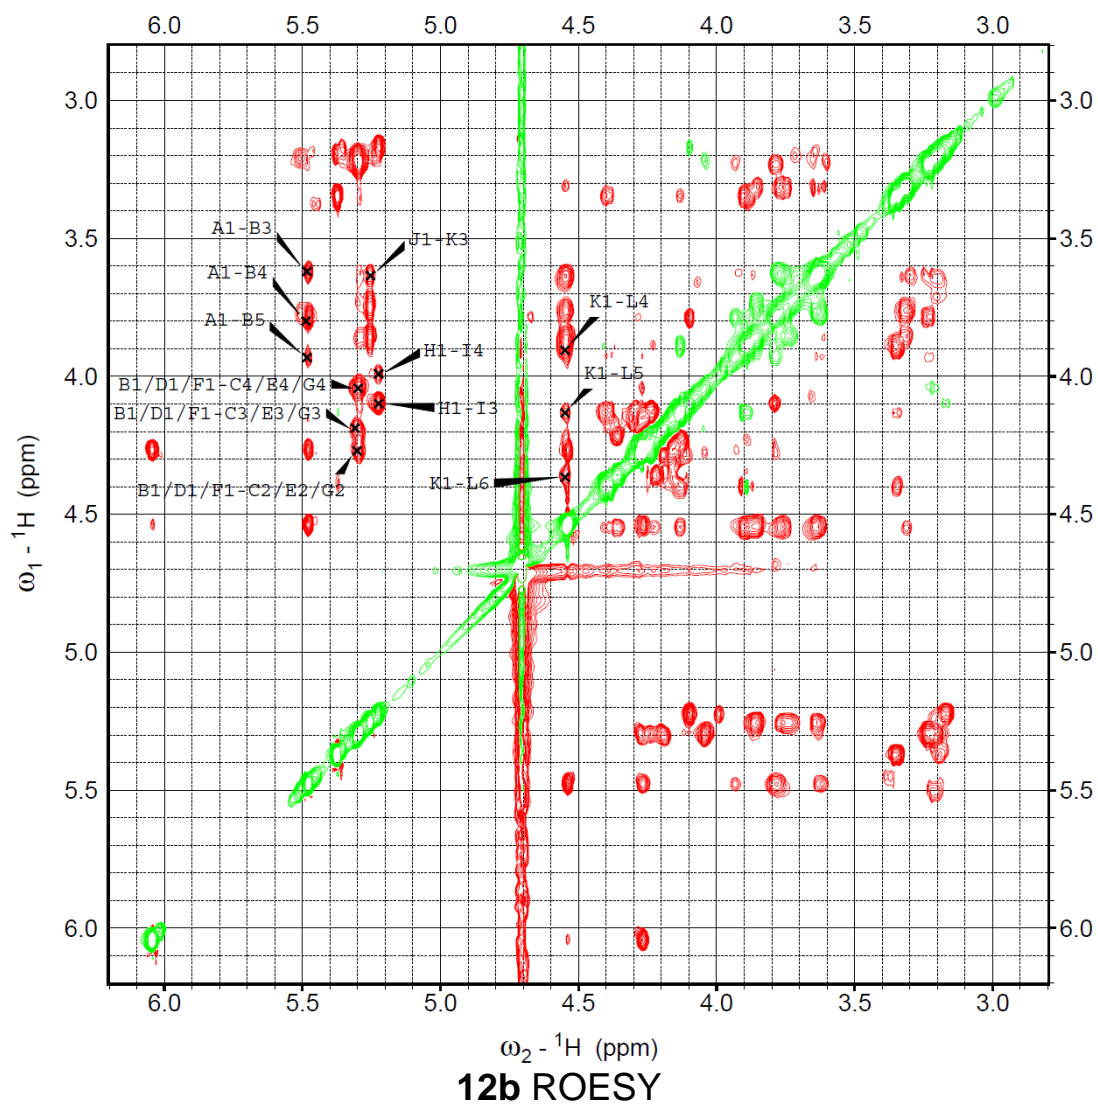

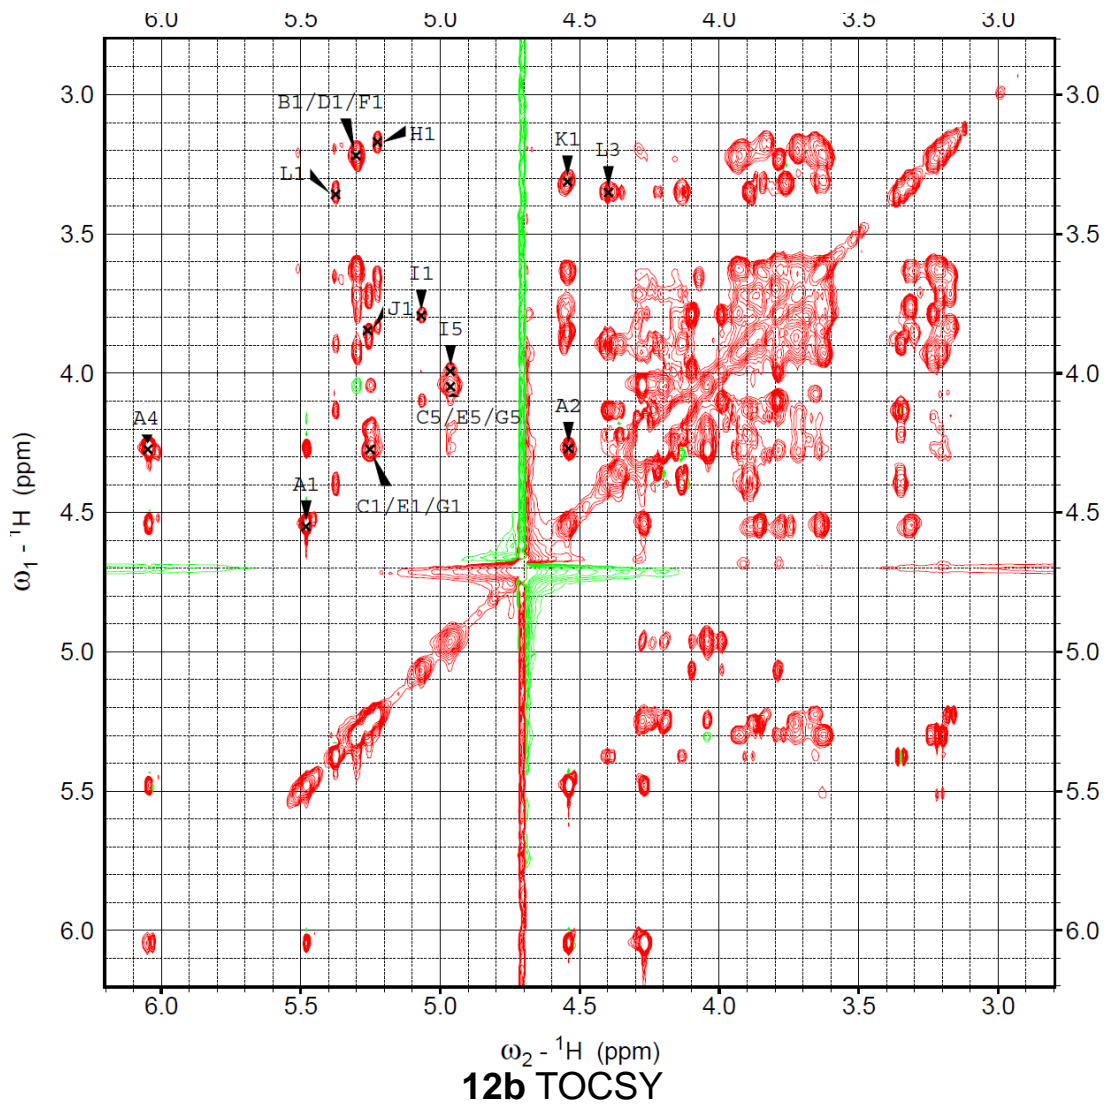

# 14a

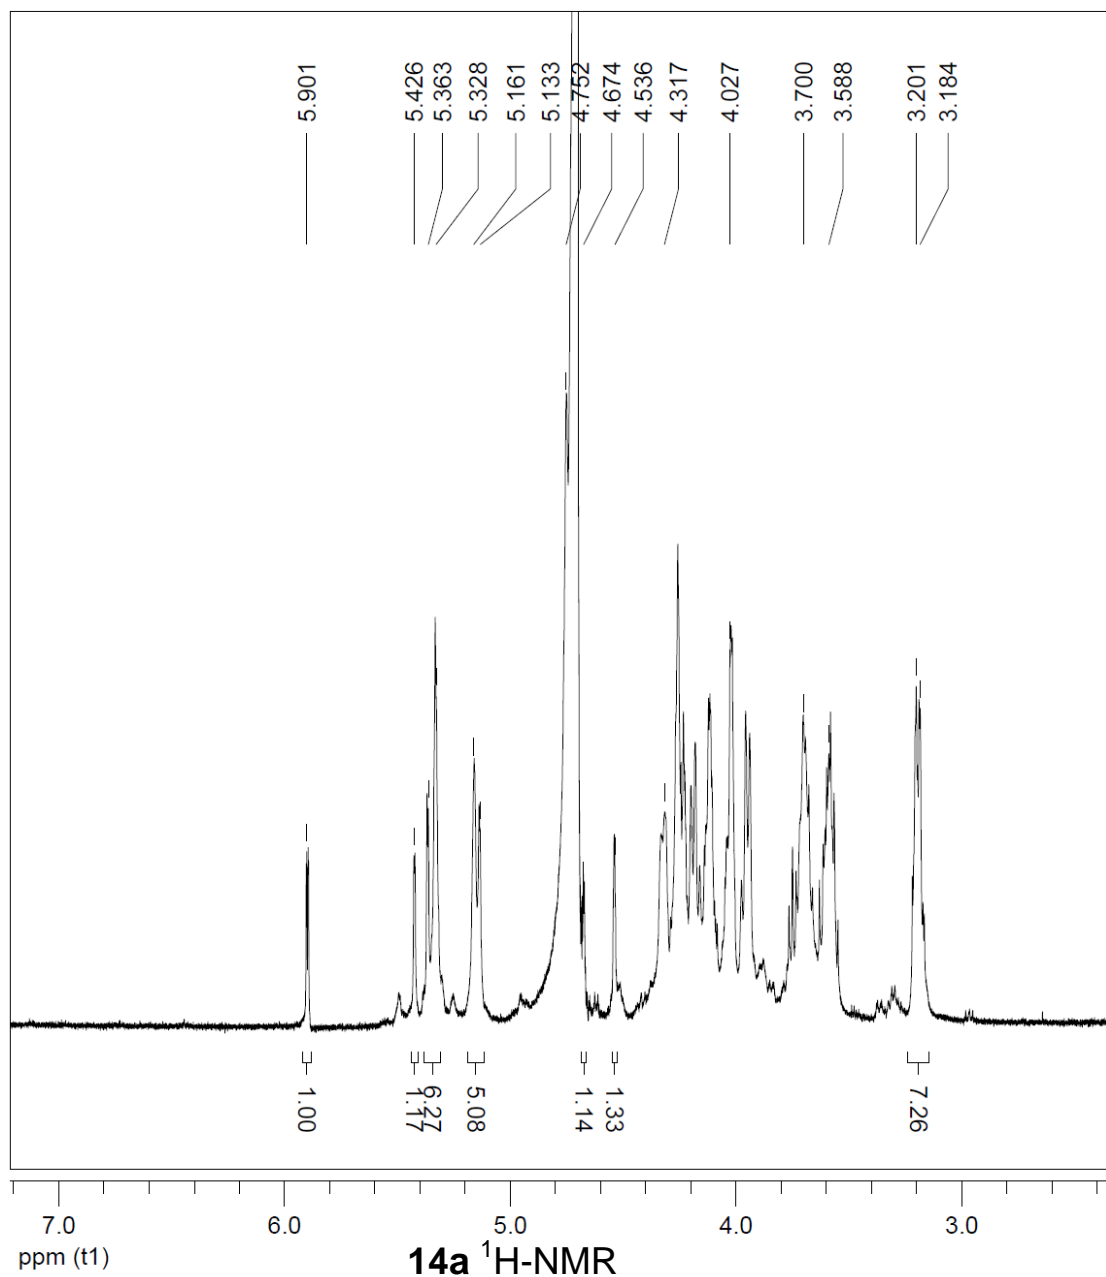

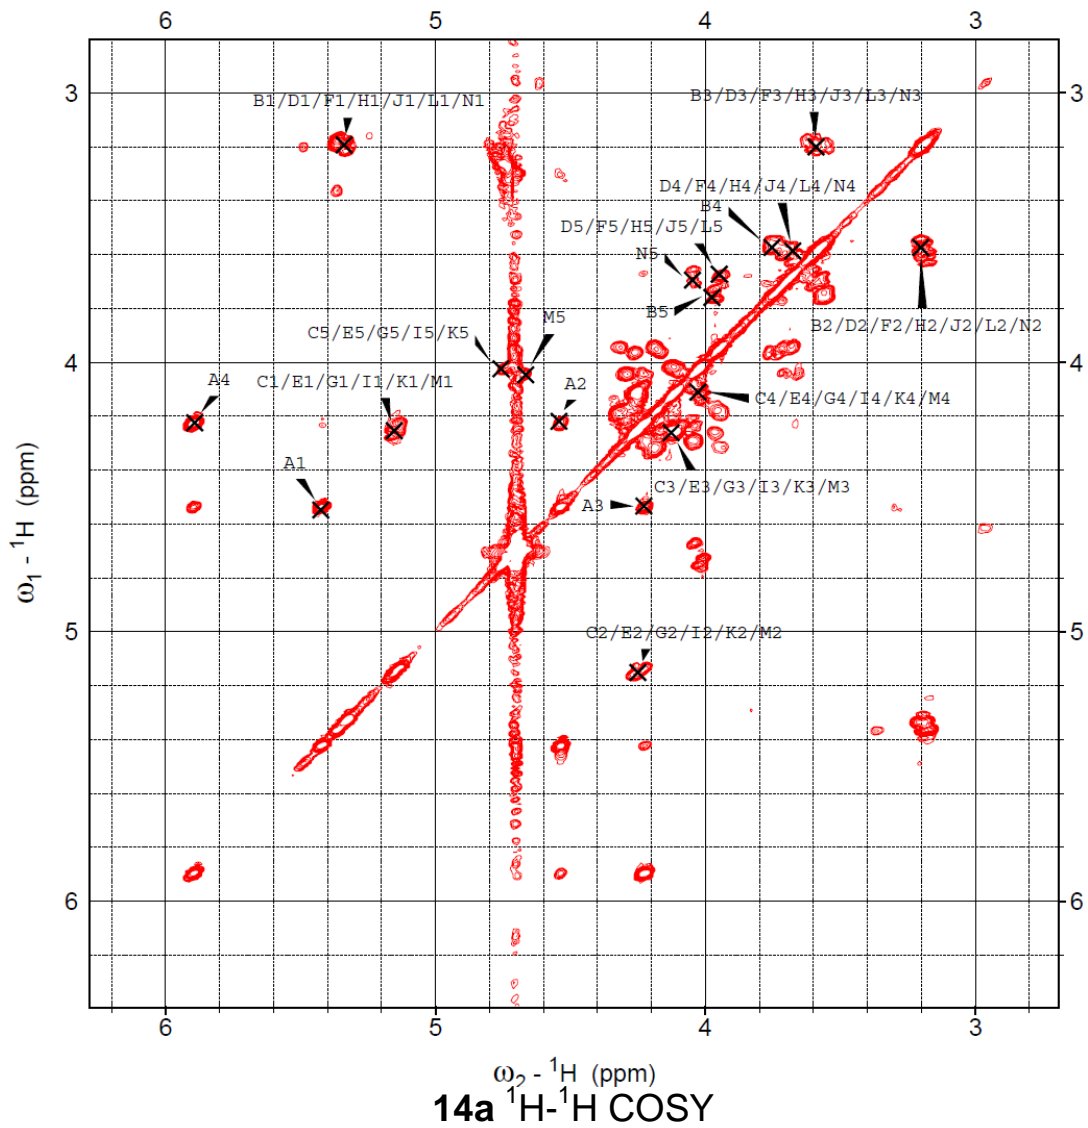

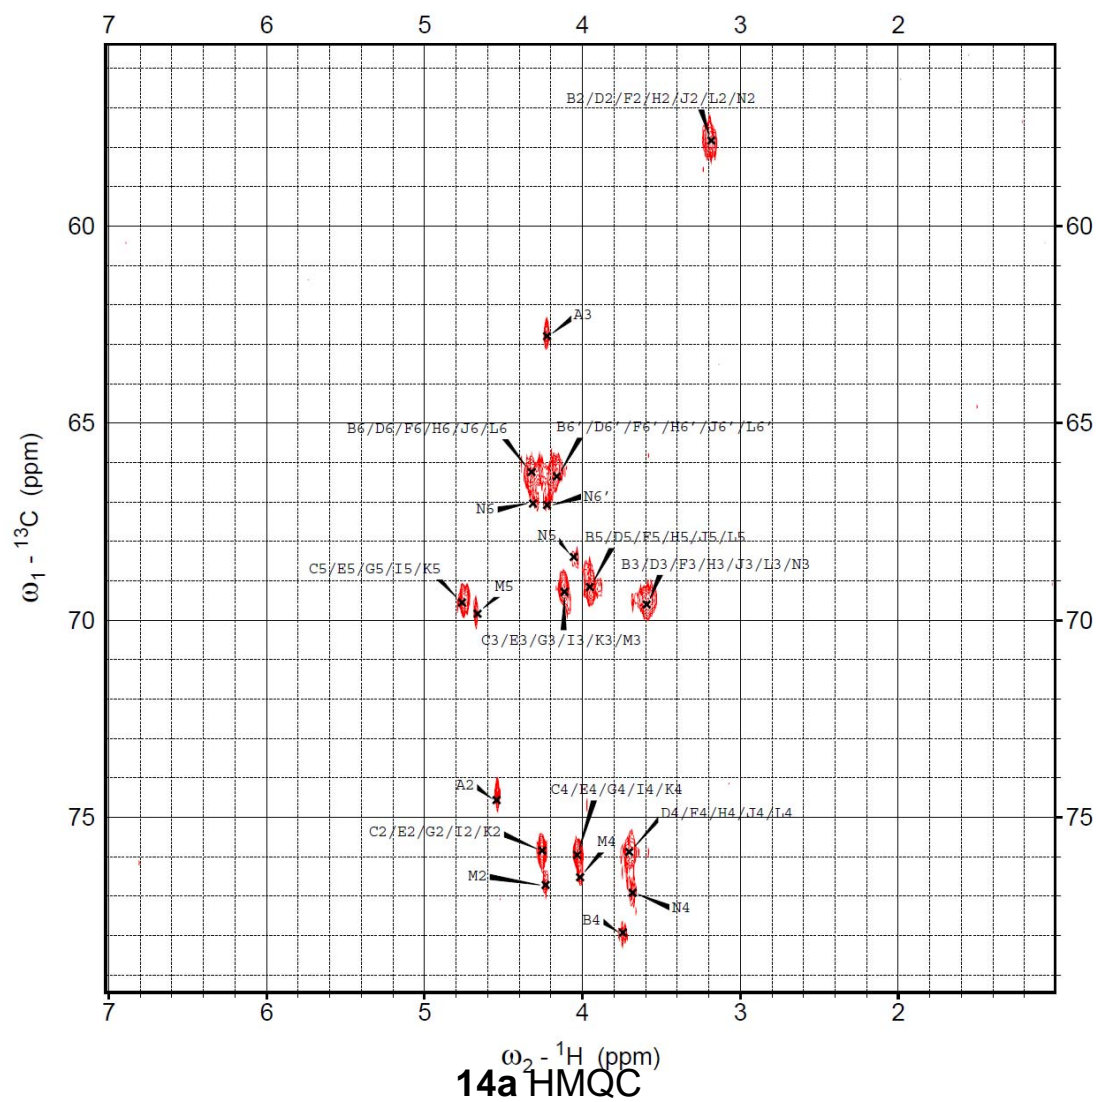

14b

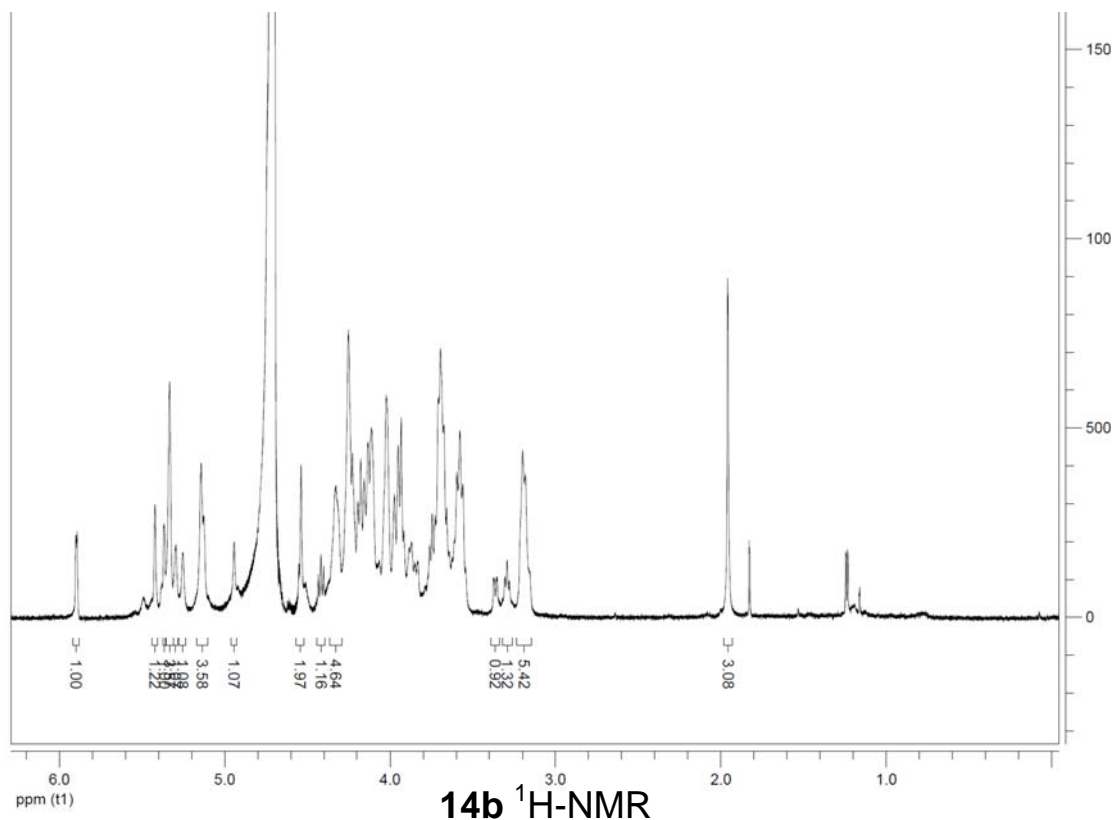

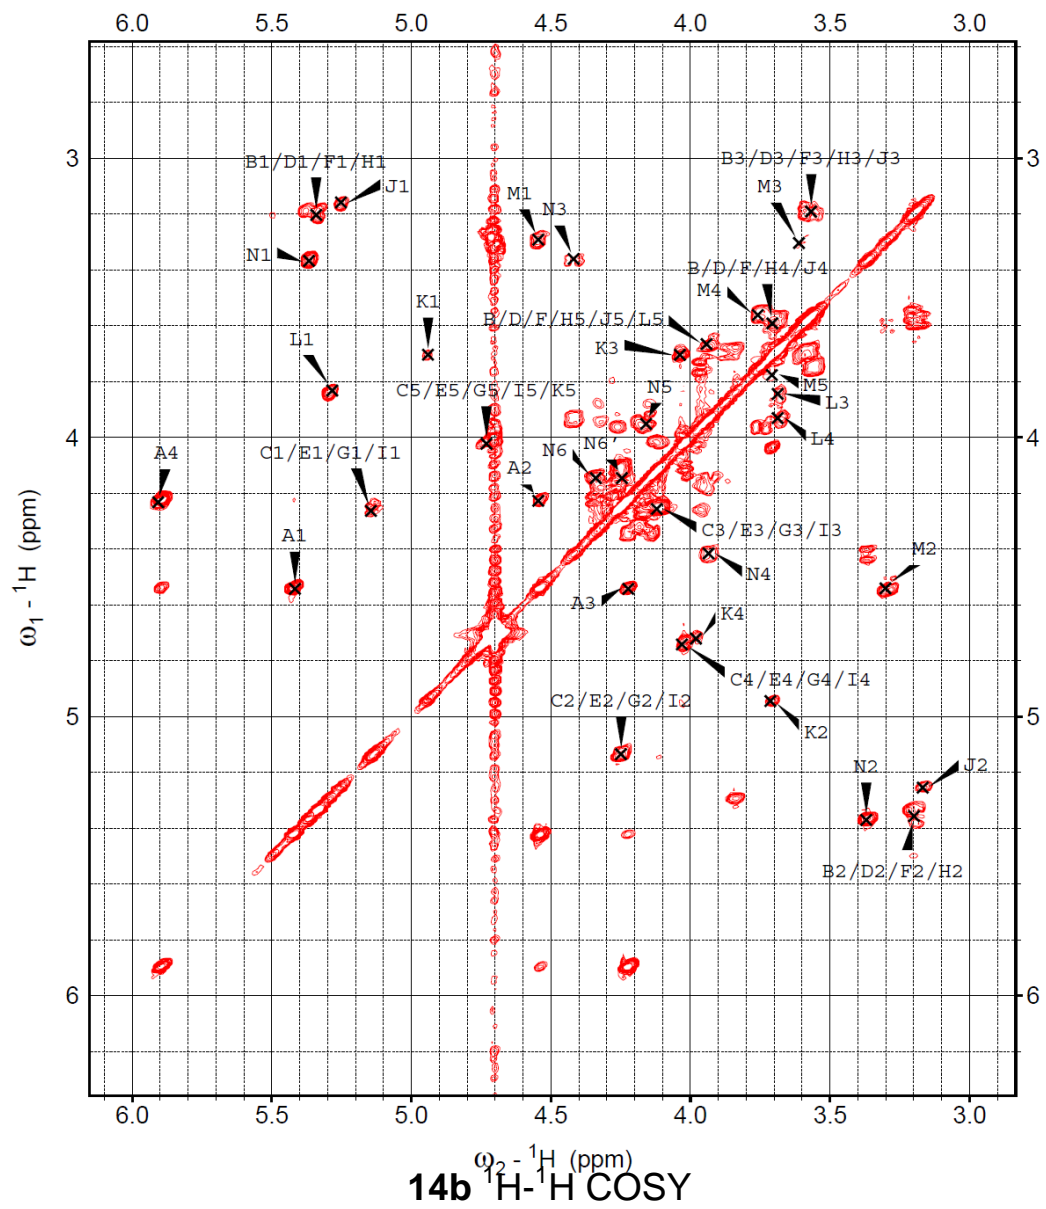



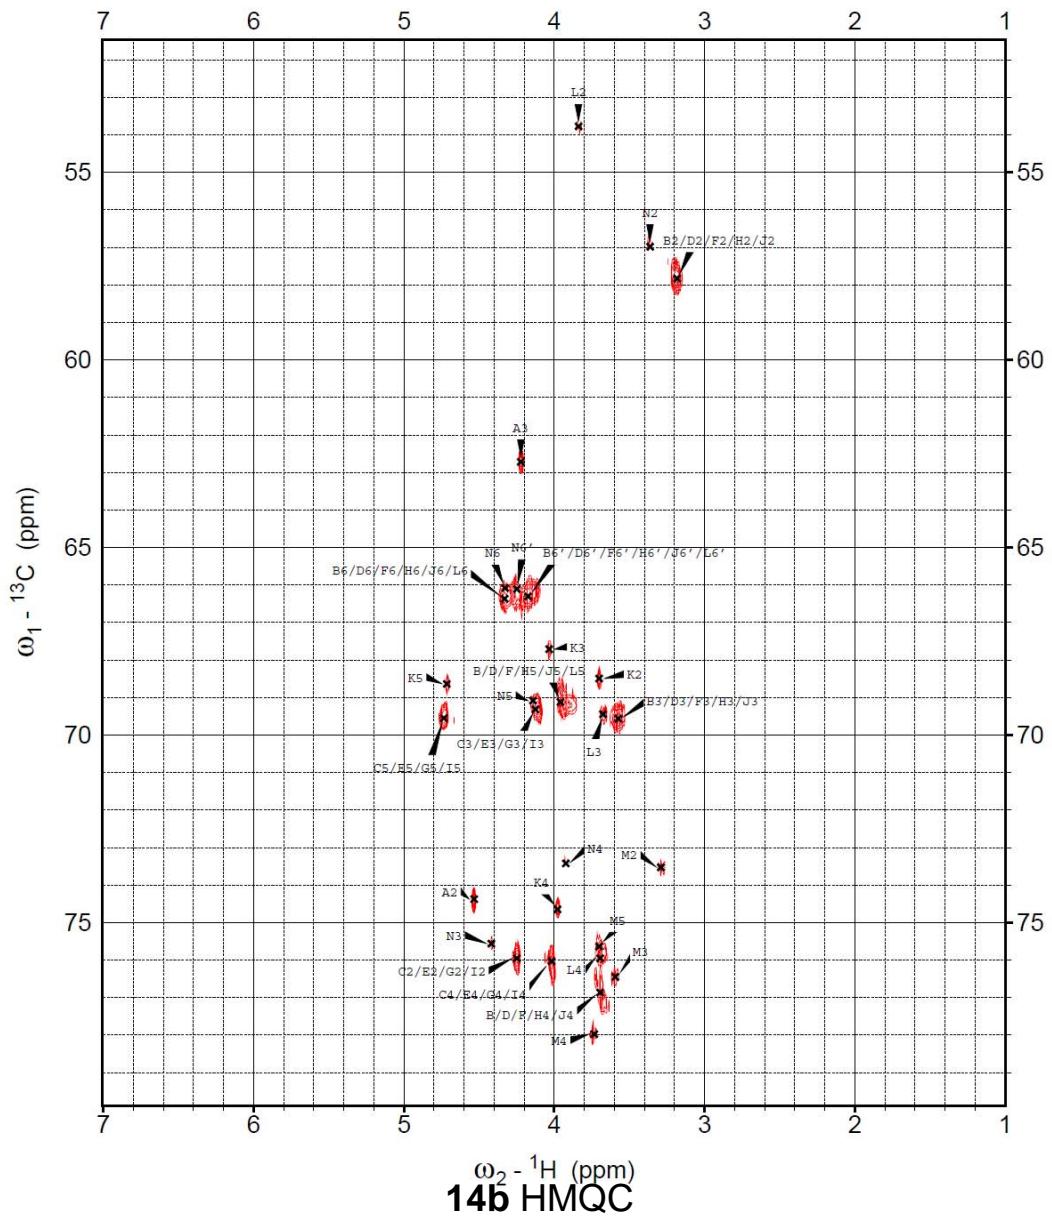

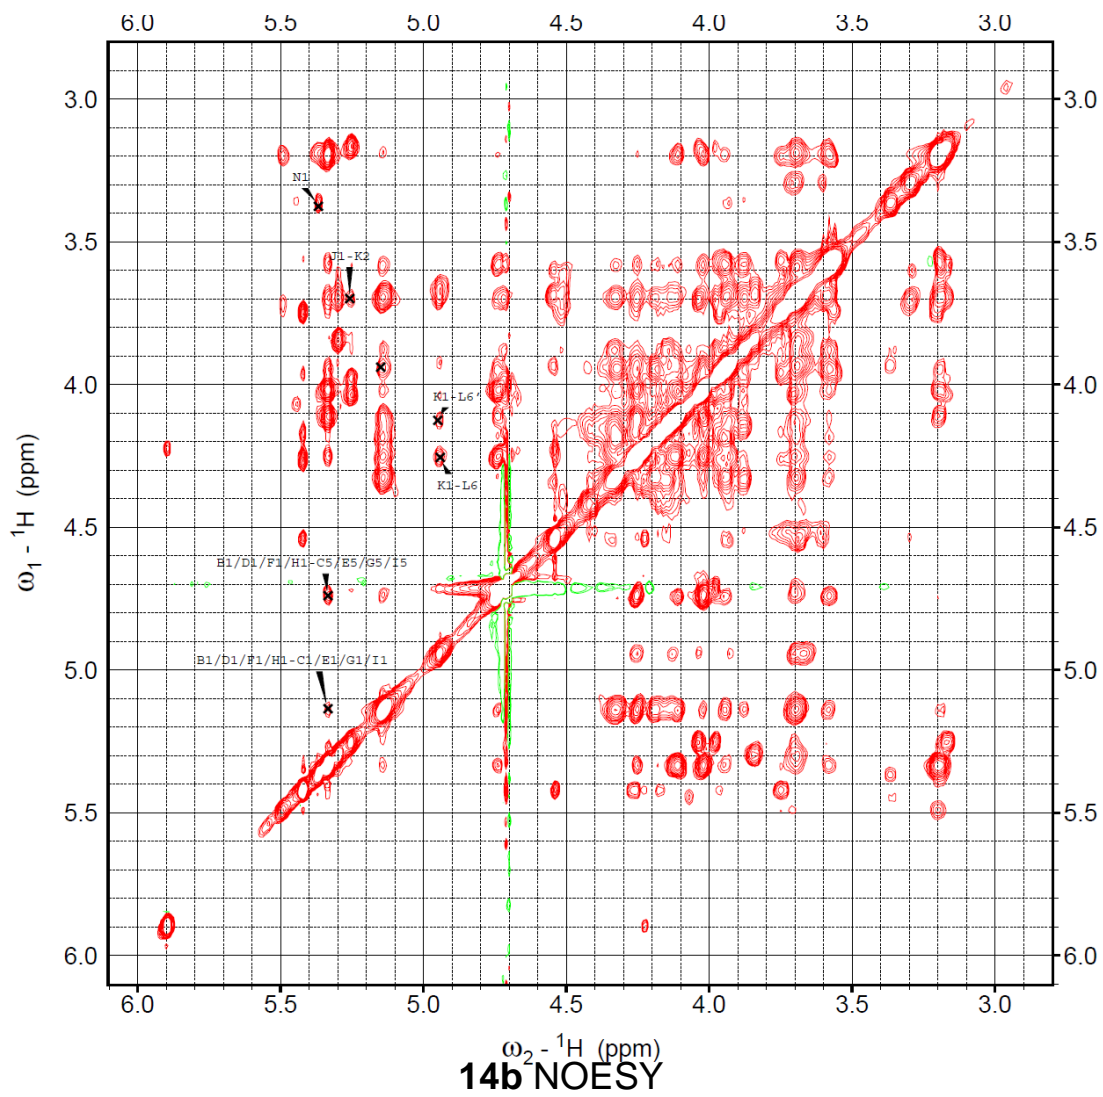

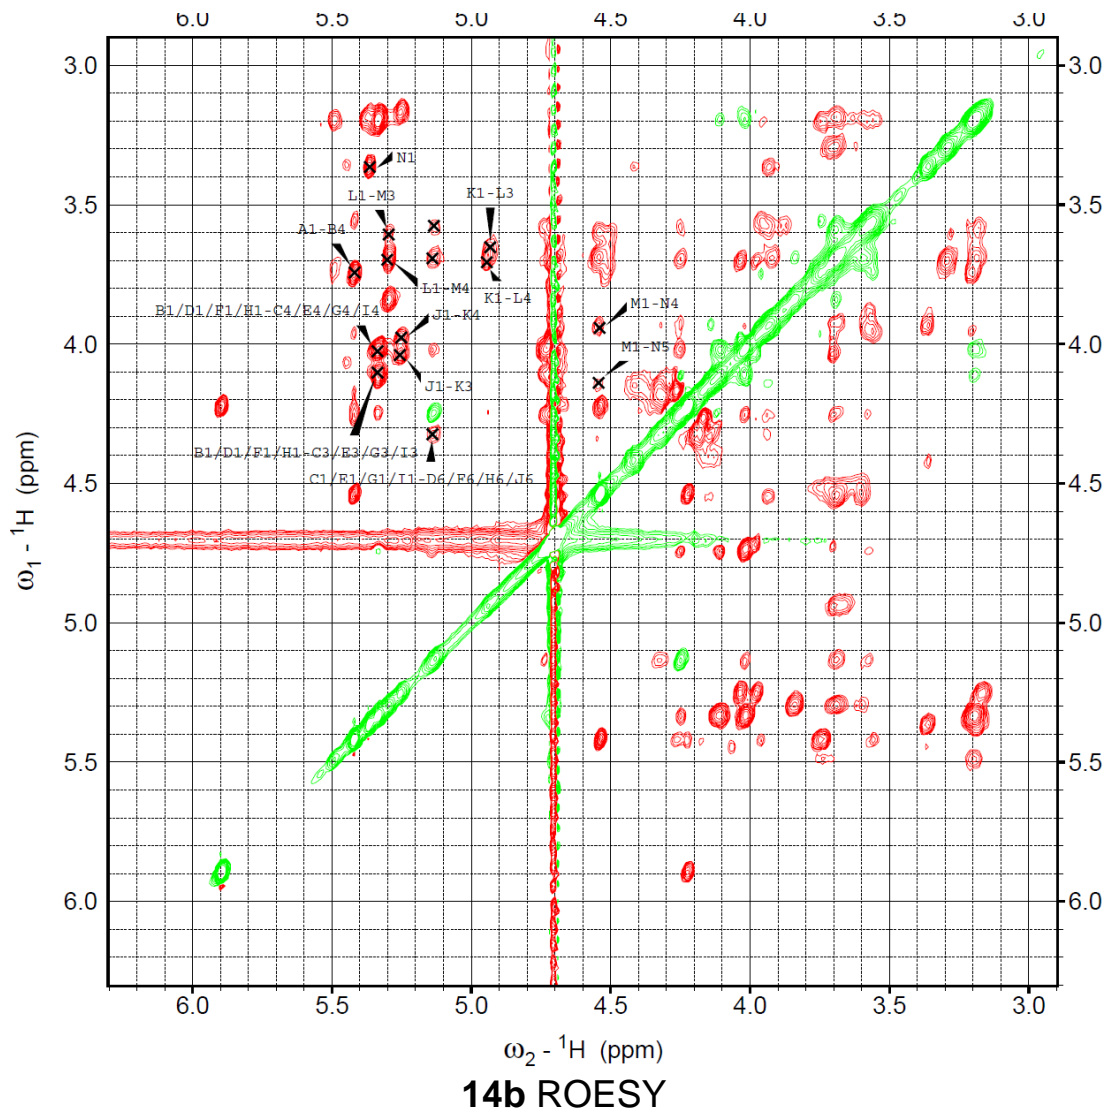

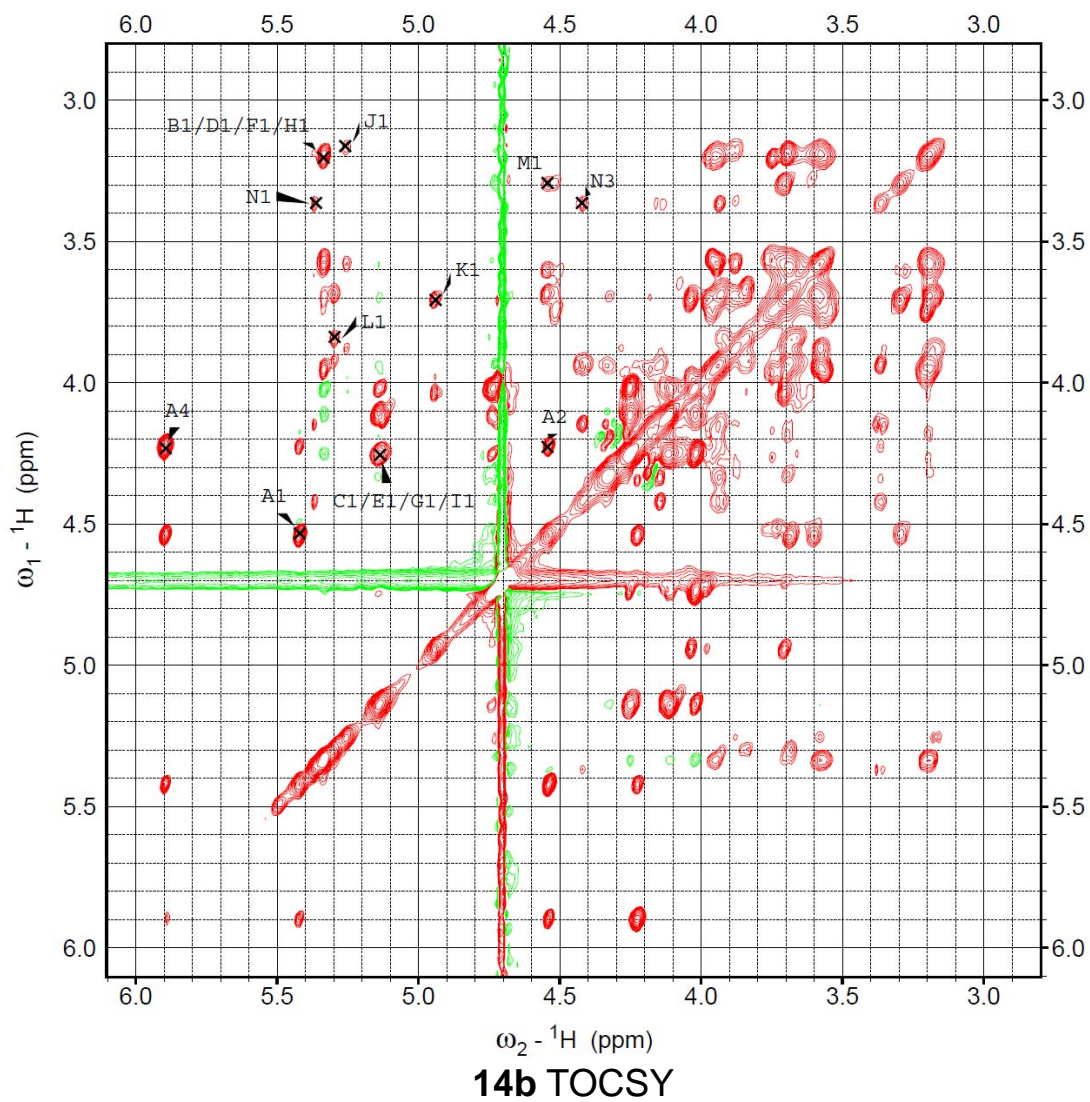

# 16a

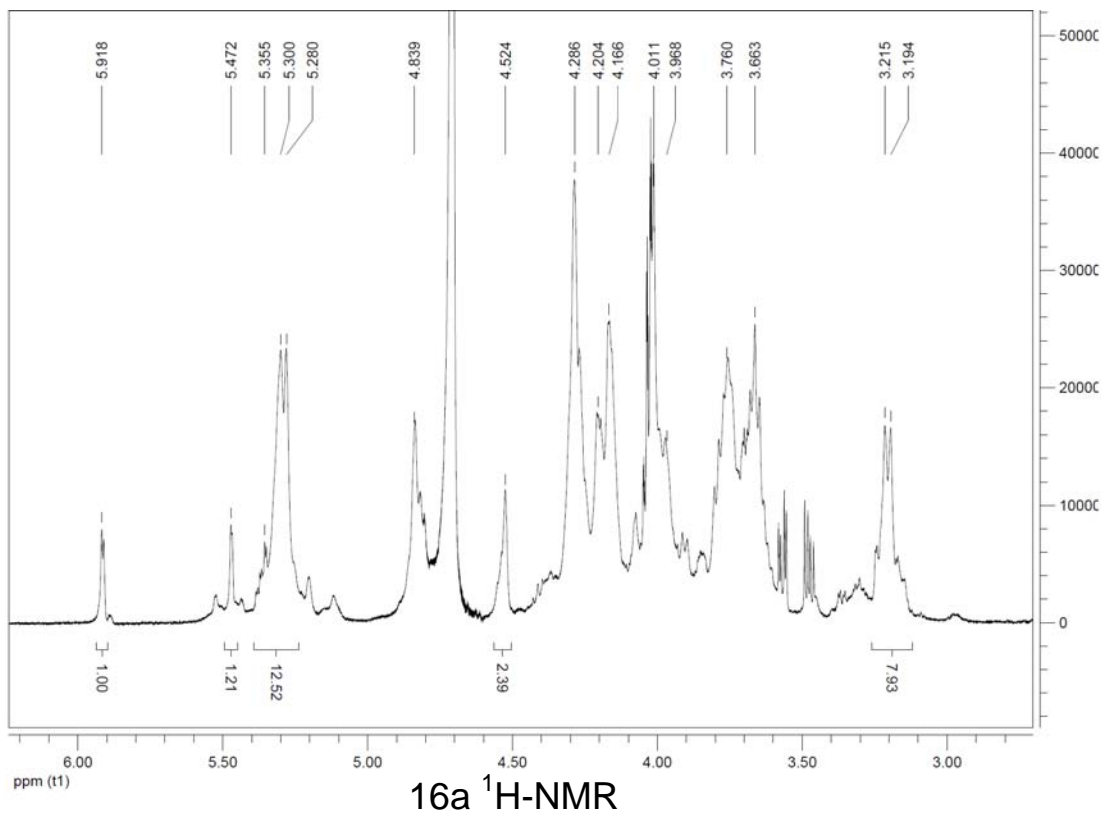

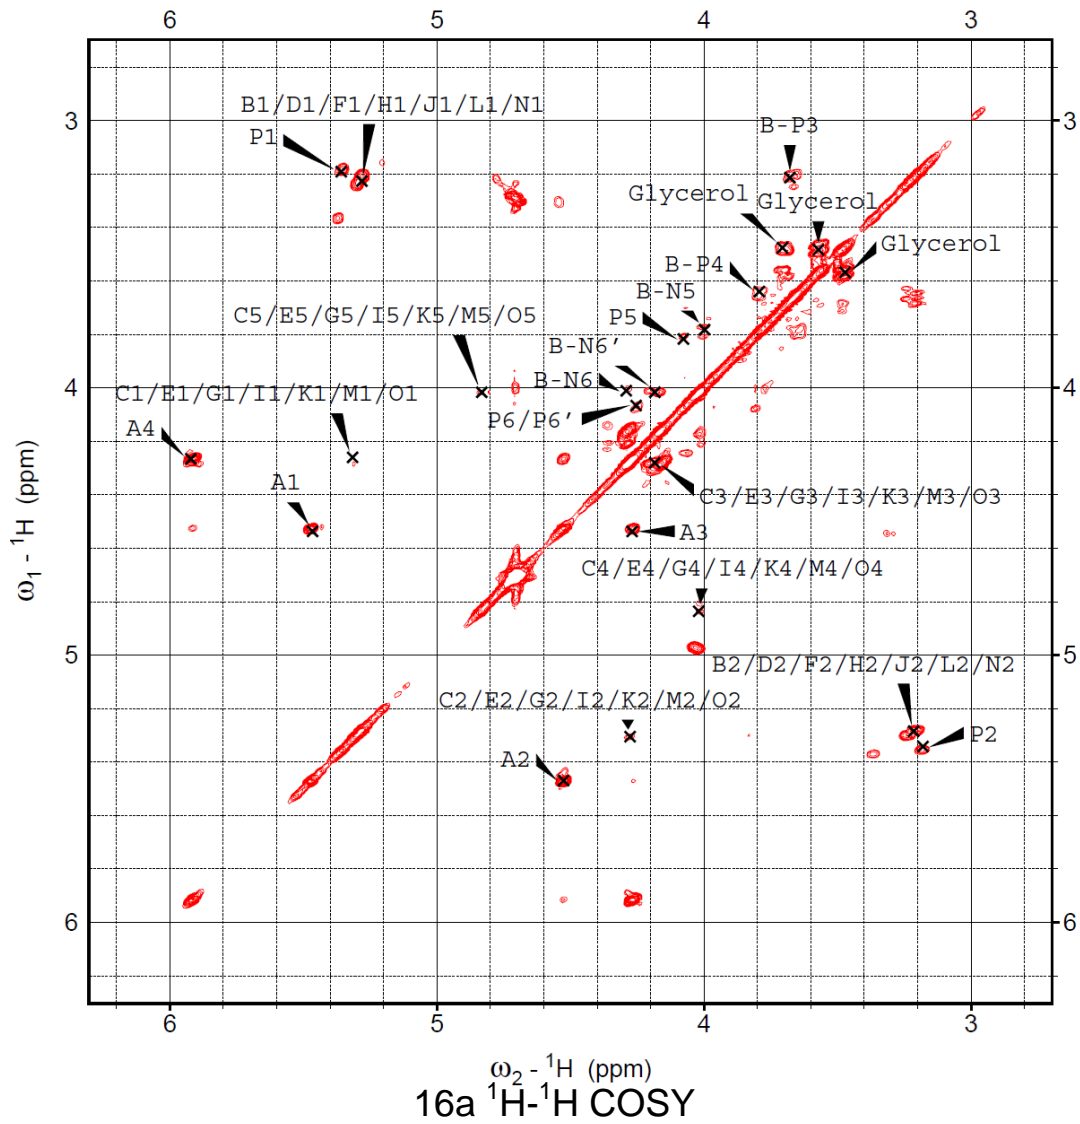

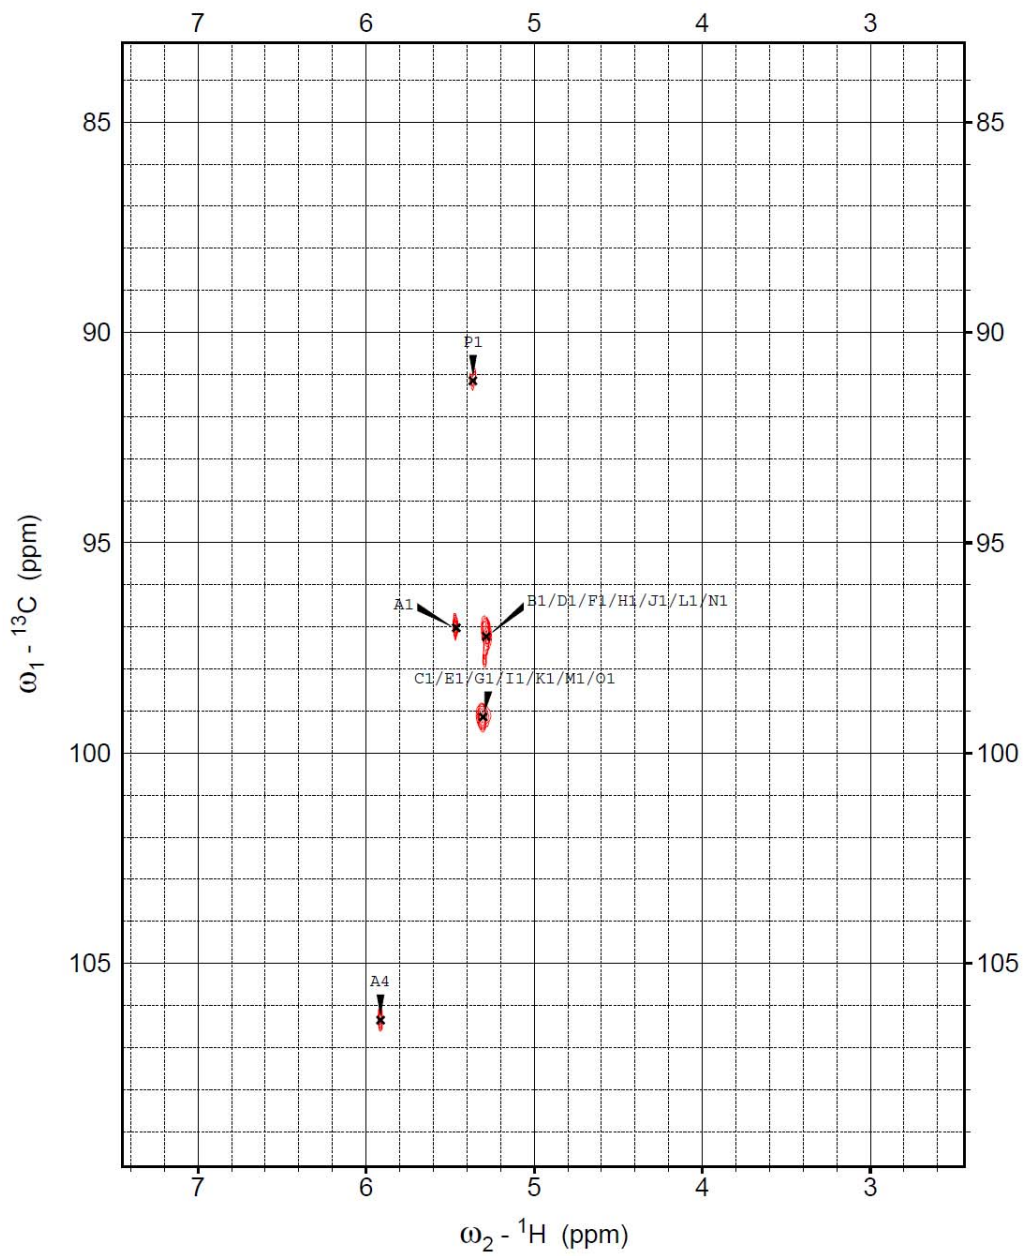

16a HMQC (part1)

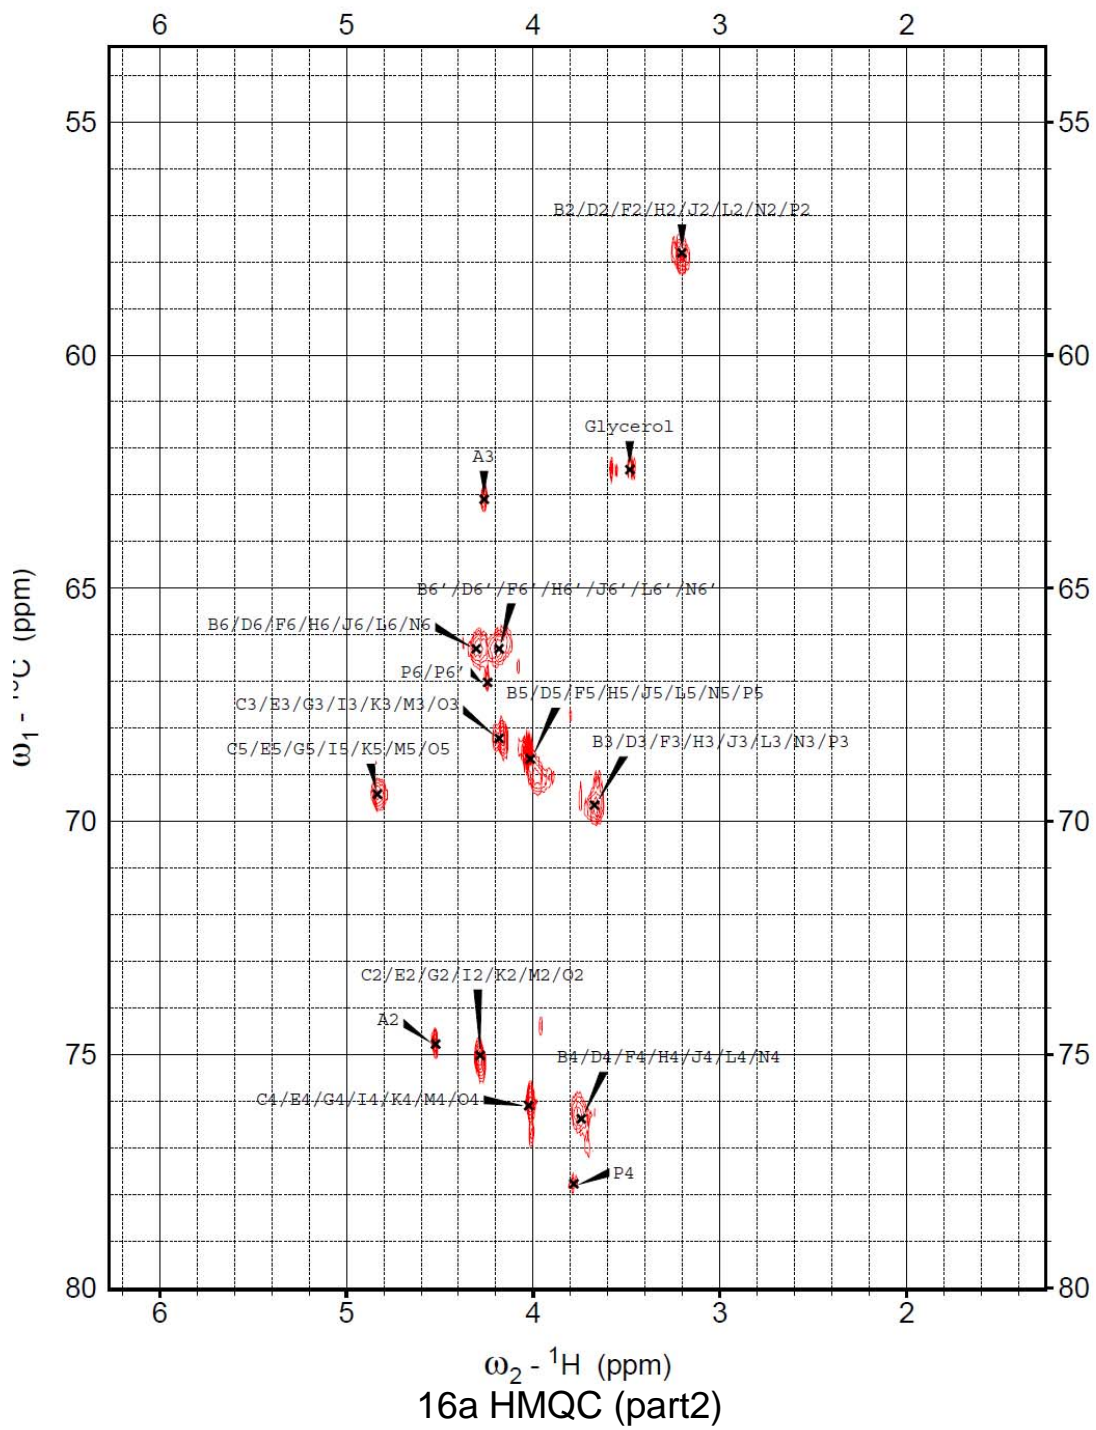

Supplement: supp_cwq123_cwq123supp.pdf [file supp_cwq123_cwq123supp.pdf]
